# Supplementary material for: Mxra8 is a receptor for multiple arthritogenic alphaviruses
Source: Springer Nature journal article supplement (doi:10.1038/s41586-018-0121-3), 2018-05-01
Supplement: MOESM4 [file 41586_2018_121_MOESM4_ESM%20(1).xlsx]

## Sheet: Library_A
id	sgrna num	pos|score	pos|p-value	pos|fdr	pos|rank	pos|goodsgrna
Mxra8	3	5.445e-14	2.1958e-07	0.00495	1	3
Ccnf	3	4.1917e-06	1.032e-05	0.116337	2	3
Fbxw7	3	3.078e-05	8.6296e-05	0.648515	3	3
Sytl4	3	5.1063e-05	0.000139	0.783416	4	2
Ormdl3	3	7.0163e-05	0.00019257	0.806106	5	2
Rfc2	3	7.9206e-05	0.00021453	0.806106	6	2
NonTargetingControlGuideForMouse_0963	1	0.00014403	0.00042182	0.868713	7	1
Sly	2	0.00015211	0.00044466	0.868713	8	2
Usp8	3	0.00015909	0.00046266	0.868713	9	2
mmu-mir-5623	4	0.00016537	0.00048462	0.868713	10	2
1700025F22Rik	3	0.00020466	0.00060012	0.868713	11	1
Olfr1057	3	0.00021083	0.00061505	0.868713	12	2
Echdc2	3	0.00021311	0.0006234	0.868713	13	2
Pabpc1l	3	0.0002178	0.00063745	0.868713	14	3
Nf2	3	0.00022314	0.00065238	0.868713	15	2
Elf5	3	0.00025013	0.00073011	0.868713	16	1
Col6a6	3	0.00025883	0.00075207	0.868713	17	3
Col6a4	3	0.00028398	0.00081531	0.868713	18	3
Ptger4	3	0.00028714	0.00082366	0.868713	19	3
Vmn1r215	3	0.00029561	0.00084166	0.868713	20	1
Atxn7l3	3	0.00029756	0.00084825	0.868713	21	3
Rsf1	3	0.00031365	0.00088777	0.868713	22	3
Col6a3	3	0.00032923	0.00092642	0.868713	23	3
Havcr1	3	0.00033997	0.00096111	0.868713	24	3
Tmem199	3	0.00034108	0.00096331	0.868713	25	2
Olfr777	3	0.00038655	0.0010937	0.940644	26	2
Ppp1cc	3	0.00046038	0.0012988	0.940644	27	2
Syt11	3	0.00047749	0.0013502	0.940644	28	1
1810037I17Rik	3	0.00047843	0.0013533	0.940644	29	2
Cand1	3	0.00048506	0.0013735	0.940644	30	3
Ythdf3	3	0.00051194	0.0014407	0.940644	31	3
Tspo	3	0.00056843	0.0015909	0.940644	32	1
Usp27x	3	0.00060659	0.0016743	0.940644	33	3
Rab39	3	0.00061389	0.0016963	0.940644	34	2
4933409G03Rik	3	0.00065936	0.0018307	0.940644	35	1
Mnt	3	0.00067649	0.0018724	0.940644	36	2
mmu-mir-692-1	4	0.00069722	0.001926	0.940644	37	1
Zar1	3	0.00070482	0.0019431	0.940644	38	1
Tas2r121	3	0.00071698	0.0019787	0.940644	39	3
Ash1l	3	0.00072604	0.0020019	0.940644	40	2
1700037C18Rik	3	0.00075027	0.0020696	0.940644	41	3
Npm1	3	0.00075028	0.0020696	0.940644	42	1
Defb20	3	0.00075574	0.0020854	0.940644	43	2
Nhlrc3	3	0.00076311	0.0021034	0.940644	44	3
1700019O17Rik	3	0.00079187	0.0021838	0.940644	45	2
2810417H13Rik	3	0.00079574	0.0021956	0.940644	46	2
Rffl	3	0.00081158	0.00224	0.940644	47	3
Top1	3	0.00082137	0.0022685	0.940644	48	2
Htr5a	3	0.00082883	0.0022883	0.940644	49	2
AU022252	3	0.00083932	0.0023173	0.940644	50	2
H1fx	3	0.0008412	0.0023221	0.940644	51	1
Sema3f	3	0.00084163	0.0023243	0.940644	52	3
Notch4	3	0.00085918	0.0023686	0.940644	53	3
Dusp28	3	0.00088665	0.0024415	0.940644	54	1
Rnf113a1	3	0.00091416	0.0025039	0.940644	55	3
Olfr303	3	0.00091845	0.0025188	0.940644	56	3
Nrn1	3	0.00093211	0.0025548	0.940644	57	1
Nploc4	3	0.0009447	0.0025878	0.940644	58	2
A330070K13Rik	3	0.00095269	0.0026111	0.940644	59	2
Nkx2-9	3	0.00096716	0.0026493	0.940644	60	2
Slc16a2	3	0.00097756	0.0026743	0.940644	61	1
Cd151	3	0.00098825	0.0027024	0.940644	62	2
Gata4	3	0.00098988	0.002705	0.940644	63	2
Recql	3	0.001023	0.0027968	0.940644	64	1
Gm16390	3	0.0010232	0.0027986	0.940644	65	3
Keg1	3	0.0010261	0.0028052	0.940644	66	2
Mettl13	3	0.0010278	0.0028091	0.940644	67	2
Olfr1436	3	0.0010685	0.0028921	0.940644	68	1
Adamts2	3	0.0011139	0.0029839	0.940644	69	1
Tnnc2	3	0.0011299	0.0030116	0.940644	70	2
Maoa	3	0.0011594	0.003066	0.940644	71	1
Cxcl10	3	0.0011971	0.0031394	0.940644	72	2
Gm5531	3	0.0012025	0.0031521	0.940644	73	2
Camkmt	3	0.0012048	0.0031565	0.940644	74	2
Tcf12	3	0.0012332	0.0032088	0.940644	75	2
Olfr642	3	0.0012503	0.0032421	0.940644	76	2
Olfr963	3	0.0012957	0.0033203	0.940644	77	1
Olfr1313	3	0.0013296	0.0033765	0.940644	78	2
Txndc17	3	0.0013411	0.0033932	0.940644	79	1
Plac1	3	0.0013561	0.0034213	0.940644	80	2
Clgn	3	0.00136	0.0034297	0.940644	81	2
Emc2	3	0.0013866	0.0034688	0.940644	82	1
Cxcr5	3	0.001432	0.0035583	0.940644	83	1
mmu-let-7g	4	0.001445	0.0035821	0.940644	84	3
mmu-mir-7013	4	0.0014452	0.0035825	0.940644	85	2
Itgb3	3	0.0014775	0.00364	0.940644	86	1
Mrap	3	0.0015229	0.0037248	0.940644	87	1
Ntrk3	3	0.0015656	0.003792	0.940644	88	2
Nop2	3	0.0015683	0.0037968	0.940644	89	1
Emc6	3	0.0015759	0.0038117	0.940644	90	2
Gm19345	3	0.0015841	0.0038258	0.940644	91	2
Unc80	3	0.0016138	0.0038855	0.940644	92	2
Pcyt2	3	0.001638	0.0039321	0.940644	93	2
Hdac5	3	0.0016611	0.003976	0.940644	94	2
Ccdc40	3	0.0017046	0.0040484	0.940644	95	2
Morn4	3	0.0017121	0.0040625	0.940644	96	2
Eif4a1	3	0.0017249	0.0040792	0.940644	97	2
Emc1	3	0.0017501	0.0041227	0.940644	98	2
Uqcrfs1	3	0.0017529	0.0041306	0.940644	99	2
Arhgef5	3	0.0017955	0.0042123	0.949653	100	1
Kcnk9	3	0.0018409	0.0042922	0.949947	101	2
Olfr834	3	0.0018863	0.0043743	0.949947	102	1
Snx7	3	0.0019233	0.0044393	0.949947	103	2
Polr1d	3	0.0019301	0.0044507	0.949947	104	2
Mtss1l	3	0.0019318	0.0044542	0.949947	105	2
Nceh1	3	0.0019772	0.004535	0.949947	106	2
Myom3	3	0.0020034	0.0045785	0.949947	107	2
Necab3	3	0.0020452	0.0046532	0.949947	108	2
mmu-mir-365-1	4	0.0020484	0.0046598	0.949947	109	3
Mitf	3	0.0020709	0.0046958	0.949947	110	2
Chpf	3	0.0020803	0.004716	0.949947	111	2
mmu-mir-3102	4	0.0020854	0.0047252	0.949947	112	3
Adcy6	3	0.0021371	0.0048157	0.949947	113	2
Emc4	3	0.0021467	0.0048346	0.949947	114	2
Dmrtc1c2	3	0.0021589	0.0048574	0.949947	115	1
Speer4c	1	0.0022211	0.0049777	0.949947	116	1
Avpr1b	3	0.0022409	0.0050159	0.949947	117	2
Gls2	3	0.0022604	0.0050506	0.949947	118	2
Krtap4-6	3	0.0023296	0.0051771	0.949947	119	2
Rhpn1	3	0.0023405	0.0051991	0.949947	120	1
Prpsap2	3	0.0023859	0.0052755	0.949947	121	1
Tmem56	3	0.0024768	0.0054437	0.949947	122	1
Ambra1	3	0.0025222	0.0055324	0.949947	123	2
Olfr954	3	0.002556	0.005593	0.949947	124	2
Itgb1bp1	3	0.0025676	0.0056136	0.949947	125	1
Ncaph2	3	0.0025874	0.0056523	0.949947	126	2
Bscl2	3	0.002613	0.0056988	0.949947	127	1
Klk1b24	3	0.0026584	0.0057823	0.949947	128	2
Zfp53	3	0.0026665	0.0057994	0.949947	129	2
Tpo	3	0.0027038	0.0058684	0.949947	130	1
Pla2g2d	3	0.0027414	0.005943	0.949947	131	2
Olfr922	3	0.0027492	0.0059584	0.949947	132	1
mmu-mir-6420	4	0.0027564	0.0059698	0.949947	133	1
Stac2	3	0.002763	0.0059803	0.949947	134	2
Emc8	3	0.0027765	0.0060071	0.949947	135	2
Samd14	3	0.0027946	0.0060423	0.949947	136	1
mmu-mir-378a	4	0.002817	0.0060827	0.949947	137	1
Camkk1	3	0.0028337	0.0061143	0.949947	138	2
Dstn	3	0.00284	0.0061235	0.949947	139	1
Olfr1281	3	0.0028502	0.0061406	0.949947	140	2
Znhit3	3	0.0028667	0.0061709	0.949947	141	2
Psg22	3	0.0028832	0.0061968	0.949947	142	2
Cblc	3	0.0028854	0.006199	0.949947	143	2
Stk31	3	0.002886	0.0062008	0.949947	144	2
Acan	3	0.0029308	0.0062816	0.949947	145	1
mmu-mir-7072	4	0.002938	0.0062913	0.949947	146	1
Gm7030	3	0.0029762	0.0063708	0.949947	147	1
mmu-mir-7670	4	0.0029985	0.0064103	0.949947	148	1
Il6st	3	0.0030216	0.006448	0.949947	149	1
Cntn4	3	0.003054	0.0065087	0.949947	150	2
Pabpn1l	3	0.0031123	0.0066132	0.949947	151	2
Larp1b	3	0.0031484	0.0066878	0.949947	152	2
Fam83a	3	0.0031577	0.006705	0.949947	153	1
Rest	3	0.0031773	0.0067366	0.949947	154	2
Ly9	3	0.0031831	0.0067493	0.949947	155	2
Mtmr10	3	0.0032355	0.0068464	0.949947	156	2
mmu-mir-7119	4	0.0032405	0.0068574	0.949947	157	1
Olfr837	3	0.0032485	0.006871	0.949947	158	2
Gp1bb	3	0.0032501	0.006874	0.949947	159	2
Gcnt1	3	0.0032939	0.006961	0.949947	160	2
Gclm	3	0.0033393	0.0070436	0.949947	161	1
Grik4	3	0.0033622	0.00708	0.949947	162	2
Cadm4	3	0.0033846	0.0071209	0.949947	163	1
Olfr263	3	0.00343	0.0071942	0.949947	164	1
Inip	3	0.0034754	0.0072759	0.949947	165	1
Dirc2	3	0.0035208	0.007362	0.949947	166	1
Leprot	3	0.003534	0.0073879	0.949947	167	2
Gtf2a1l	3	0.0035401	0.0073958	0.949947	168	2
BC004004	3	0.0035462	0.0074089	0.949947	169	2
Ccdc82	3	0.0035662	0.0074366	0.949947	170	1
Krtap13-1	3	0.0036106	0.0075117	0.949947	171	2
Tnc	3	0.0036115	0.0075143	0.949947	172	1
Tm9sf4	3	0.0036569	0.0075982	0.949947	173	1
Tmem138	3	0.0037023	0.0076746	0.949947	174	1
Vmn2r102	3	0.0037067	0.0076799	0.949947	175	2
NonTargetingControlGuideForMouse_0401	1	0.0037372	0.0077344	0.949947	176	1
Fut11	3	0.0037476	0.0077572	0.949947	177	1
4933426M11Rik	3	0.0037851	0.0078354	0.949947	178	2
Gm1564	3	0.003793	0.0078507	0.949947	179	1
mmu-mir-377	4	0.0038234	0.0079087	0.949947	180	2
Gab1	3	0.0038837	0.0080264	0.949947	181	1
Zak	3	0.0038899	0.0080378	0.949947	182	2
Glmn	3	0.0038931	0.0080418	0.949947	183	2
Zfp324	3	0.0039291	0.0080971	0.949947	184	1
Slc25a4	3	0.0039745	0.008188	0.949947	185	1
Tbcb	3	0.0039993	0.0082324	0.949947	186	2
Tm2d1	3	0.0040198	0.008268	0.949947	187	1
Btbd3	3	0.004048	0.0083202	0.949947	188	2
mmu-mir-7675	2	0.0040517	0.0083286	0.949947	189	2
Sparcl1	3	0.0040652	0.0083488	0.949947	190	1
Timm13	3	0.0040806	0.0083734	0.949947	191	2
Klhl24	3	0.0041105	0.008423	0.949947	192	2
Zfp365	3	0.0041298	0.0084476	0.949947	193	2
Amdhd2	3	0.0041595	0.0085029	0.949947	194	2
Mreg	3	0.0042013	0.008571	0.949947	195	1
Olfr1029	3	0.0042158	0.0085921	0.949947	196	2
Hist1h2ba	3	0.0042466	0.0086527	0.949947	197	1
Olfr1298	3	0.0042558	0.0086693	0.949947	198	2
Hipk3	3	0.004292	0.0087335	0.949947	199	1
Zfp248	3	0.0043261	0.008791	0.949947	200	2
Ndufa2	3	0.0043329	0.0088011	0.949947	201	2
Siglec15	3	0.0043373	0.0088086	0.949947	202	2
Bace1	3	0.0043599	0.0088477	0.949947	203	2
Snrnp48	3	0.0043827	0.0088885	0.949947	204	1
NonTargetingControlGuideForMouse_0405	1	0.0044194	0.0089561	0.949947	205	1
Lrr1	3	0.004428	0.0089733	0.949947	206	1
Gpr39	3	0.0044345	0.0089851	0.949947	207	2
Crygn	3	0.0044379	0.0089913	0.949947	208	2
9130401M01Rik	3	0.0044734	0.009051	0.949947	209	1
Zfp26	3	0.0045166	0.0091388	0.949947	210	2
Olfr1254	3	0.0045187	0.0091441	0.949947	211	1
Nthl1	3	0.00452	0.0091458	0.949947	212	2
Sez6	3	0.0045641	0.009217	0.949947	213	1
Atg14	3	0.0046094	0.0093009	0.949947	214	1
Olfm4	3	0.0046446	0.0093628	0.949947	215	2
Shroom1	3	0.0047001	0.0094458	0.949947	216	1
Cyr61	3	0.0047908	0.0096021	0.949947	217	1
Grik1	3	0.0048361	0.0096829	0.949947	218	1
Gpn3	3	0.0048665	0.0097352	0.949947	219	2
Crb3	3	0.0048814	0.0097609	0.949947	220	1
Pgk1	3	0.0049022	0.0097976	0.949947	221	2
Dmrt2	3	0.0049268	0.0098432	0.949947	222	1
Mrpl51	3	0.0049721	0.0099262	0.949947	223	1
Nmnat3	3	0.0049776	0.0099363	0.949947	224	2
F830016B08Rik	3	0.0049992	0.0099772	0.949947	225	2
Fam13b	3	0.0050174	0.010013	0.949947	226	1
Pcdhb14	3	0.0050282	0.010032	0.949947	227	2
mmu-mir-6346	4	0.0050574	0.010084	0.949947	228	2
Smg7	3	0.0050628	0.010091	0.949947	229	1
mmu-mir-5627	4	0.0051146	0.010182	0.949947	230	1
Abi3bp	3	0.0051534	0.010251	0.949947	231	1
Zwint	3	0.0051593	0.010263	0.949947	232	2
Zfp512	3	0.005163	0.010271	0.949947	233	2
Aldh18a1	3	0.005174	0.010292	0.949947	234	2
NonTargetingControlGuideForMouse_0636	1	0.0051926	0.010332	0.949947	235	1
Traf2	3	0.005196	0.010339	0.949947	236	2
Lipf	3	0.0051987	0.010343	0.949947	237	2
Actrt1	3	0.0052255	0.010383	0.949947	238	2
Olfr145	3	0.0052441	0.010419	0.949947	239	1
Igflr1	3	0.0052698	0.010465	0.949947	240	2
NonTargetingControlGuideForMouse_0399	1	0.0052836	0.010485	0.949947	241	1
Crtc1	3	0.0052894	0.010494	0.949947	242	1
Atn1	3	0.0052921	0.010499	0.949947	243	2
Ppp4r1	3	0.0052995	0.01051	0.949947	244	2
Atp6v1d	3	0.0053032	0.010517	0.949947	245	2
Amotl2	3	0.0053106	0.010536	0.949947	246	2
Trappc12	3	0.0053218	0.010562	0.949947	247	2
Chp1	3	0.0053347	0.010588	0.949947	248	1
Zfp219	3	0.0053553	0.010621	0.949947	249	2
Vma21	3	0.0054254	0.010746	0.949947	250	1
Ubtf	3	0.0054453	0.010782	0.949947	251	2
Sertad4	3	0.0054641	0.010817	0.949947	252	2
mmu-mir-7654	4	0.0055374	0.010958	0.949947	253	1
Sin3b	3	0.0055613	0.011002	0.949947	254	1
Gm11437	3	0.0056066	0.011085	0.949947	255	1
Mrpl14	3	0.0056426	0.011137	0.949947	256	2
Hist2h4	3	0.0056519	0.011145	0.949947	257	1
Nanos3	3	0.0056771	0.011191	0.949947	258	2
Gm13043	2	0.0056879	0.01121	0.949947	259	2
Lrrc14b	3	0.0056972	0.011224	0.949947	260	1
mmu-mir-1b	4	0.0057053	0.011238	0.949947	261	2
Myh10	3	0.0057175	0.011257	0.949947	262	2
Tm4sf5	3	0.0057696	0.011354	0.949947	263	2
Erap1	3	0.0057879	0.011388	0.949947	264	1
Vmn2r106	3	0.0058084	0.011421	0.949947	265	2
Lyrm9	3	0.0058123	0.011428	0.949947	266	2
Zfp27	3	0.0058332	0.011462	0.949947	267	1
Olfr381	3	0.0058492	0.01149	0.949947	268	2
Bcan	3	0.0058785	0.011543	0.949947	269	2
Pln	3	0.0058941	0.011576	0.949947	270	2
mmu-mir-344d-1	2	0.0058979	0.011583	0.949947	271	2
Pnmal1	3	0.0059097	0.011605	0.949947	272	2
Zmat1	3	0.0059238	0.011632	0.949947	273	1
Rsbn1	3	0.005945	0.01167	0.949947	274	2
Lrp11	3	0.0059647	0.011709	0.949947	275	2
Cabp1	3	0.0059691	0.011715	0.949947	276	2
Gyltl1b	3	0.006012	0.011795	0.949947	277	2
Clca3	3	0.0060144	0.011799	0.949947	278	1
Nppc	3	0.0060357	0.011831	0.949947	279	2
Vmn1r192	3	0.0060436	0.011845	0.949947	280	2
Prph	3	0.0060594	0.011878	0.949947	281	2
Tubb1	3	0.006105	0.011958	0.949947	282	1
Mug2	3	0.006115	0.011971	0.949947	283	2
Tex15	3	0.0061828	0.012097	0.949947	284	2
Cbr1	3	0.0061956	0.012123	0.949947	285	1
Capn9	3	0.0062409	0.012207	0.949947	286	1
NonTargetingControlGuideForMouse_0132	1	0.006269	0.01227	0.949947	287	1
Synpo2	3	0.0062833	0.012296	0.949947	288	2
Rpl12	3	0.0062861	0.012301	0.949947	289	1
mmu-mir-6399	4	0.0063222	0.012363	0.949947	290	1
Vps36	3	0.0063277	0.012372	0.949947	291	2
Aknad1	3	0.0063314	0.012376	0.949947	292	1
mmu-mir-27b	4	0.0063677	0.012448	0.949947	293	2
Fbxl14	3	0.0063767	0.012468	0.949947	294	1
Vipr2	3	0.0063804	0.012476	0.949947	295	2
Ctdsp2	3	0.0063885	0.012493	0.949947	296	2
Cd164l2	3	0.0064211	0.012556	0.949947	297	2
Nr1h4	3	0.006422	0.012556	0.949947	298	1
Stard3	3	0.0064673	0.012651	0.953889	299	1
Olfr904	3	0.0065126	0.012722	0.955921	300	1
Tmem79	3	0.0065579	0.012794	0.955921	301	1
Dleu7	3	0.0065645	0.012805	0.955921	302	2
Ccdc54	3	0.0066032	0.01287	0.957602	303	1
Slco6c1	3	0.0066803	0.013001	0.959636	304	2
Dnaja1	3	0.0066928	0.013024	0.959636	305	2
Tpra1	3	0.0066937	0.013025	0.959636	306	1
Siah3	3	0.006739	0.013104	0.961271	307	1
Aldh1a3	3	0.0067843	0.01319	0.961271	308	1
mmu-mir-703	4	0.0068226	0.013248	0.961271	309	2
Dusp16	3	0.0068296	0.013259	0.961271	310	1
Api5	3	0.0068558	0.013297	0.961271	311	2
Apol8	3	0.0068748	0.013334	0.961271	312	1
Prss43	3	0.0069654	0.013487	0.961271	313	1
Ccdc77	3	0.0069741	0.013502	0.961271	314	2
mmu-mir-378c	4	0.0069756	0.013503	0.961271	315	2
Il12a	3	0.0070106	0.013556	0.961271	316	1
Zfp108	3	0.0070559	0.013646	0.961271	317	1
Stt3b	3	0.0071233	0.013765	0.961271	318	2
Klra19	3	0.0071464	0.01381	0.961271	319	2
mmu-mir-6946	4	0.0071669	0.013856	0.961271	320	1
Cd19	3	0.0071917	0.013911	0.961271	321	1
Tmem176b	3	0.0072265	0.013967	0.961271	322	2
Aym1	3	0.007237	0.013989	0.961271	323	1
Trak2	3	0.0072437	0.014005	0.961271	324	2
Syt14	3	0.007274	0.014046	0.961271	325	2
B4galt7	3	0.0072822	0.014062	0.961271	326	1
Tnfaip8l2	3	0.007313	0.014122	0.961271	327	2
Gng13	3	0.0073173	0.01413	0.961271	328	2
Sh3bp5l	3	0.0073275	0.014148	0.961271	329	1
mmu-mir-7093	4	0.0073479	0.014179	0.961271	330	1
Iigp1	3	0.0073608	0.014201	0.961271	331	2
Tmem211	3	0.0073728	0.014226	0.961271	332	1
Olfr150	3	0.007418	0.014311	0.961271	333	1
Urgcp	3	0.0074219	0.014323	0.961271	334	2
Sema5b	3	0.0074525	0.014374	0.961271	335	2
Olfr213	3	0.0074633	0.014394	0.961271	336	1
Myh13	3	0.0074744	0.014412	0.961271	337	2
Mettl24	3	0.0075085	0.014466	0.961271	338	1
Ccl24	3	0.0075538	0.014554	0.961271	339	1
Snupn	3	0.0075601	0.014566	0.961271	340	2
Crocc	3	0.007599	0.014631	0.961271	341	1
Ccdc141	3	0.0076153	0.014659	0.961271	342	2
Ncam1	3	0.0076198	0.014669	0.961271	343	2
Cyp2e1	3	0.0076242	0.014675	0.961271	344	2
Cpq	3	0.0076443	0.01471	0.961271	345	1
Ube2k	3	0.007713	0.014837	0.965515	346	2
mmu-mir-448	4	0.0077336	0.014874	0.965515	347	2
Ccl28	3	0.00778	0.014964	0.965515	348	1
Nudt16l1	3	0.0078253	0.015044	0.965515	349	1
Socs3	3	0.0078705	0.015123	0.965515	350	2
Uts2b	3	0.0078853	0.015146	0.965515	351	2
Top2b	3	0.0079158	0.015202	0.965515	352	1
Tas2r140	3	0.0079371	0.015237	0.965515	353	2
Asb10	3	0.007961	0.015279	0.965515	354	1
Klf6	3	0.0079959	0.015339	0.965515	355	2
Blzf1	3	0.0080063	0.015354	0.965515	356	1
Gpatch11	3	0.0080515	0.015426	0.965515	357	1
Irf2bp1	3	0.0080776	0.015471	0.965515	358	2
Slc37a1	3	0.0080967	0.015501	0.965515	359	1
Chad	3	0.008142	0.015577	0.965515	360	1
Mta1	3	0.008146	0.015588	0.965515	361	2
Atp6v1f	3	0.0081872	0.015664	0.965515	362	1
Adam28	3	0.0082324	0.015738	0.965515	363	1
Uggt2	3	0.0082515	0.015766	0.965515	364	2
2300003K06Rik	3	0.0083229	0.015889	0.965515	365	2
St7	3	0.0083681	0.015977	0.965515	366	1
Olfr1259	3	0.0084134	0.016054	0.965515	367	1
Ulk3	3	0.008441	0.016096	0.965515	368	2
Clcn6	3	0.0084783	0.01617	0.965515	369	2
Gorab	3	0.0084969	0.016198	0.965515	370	2
Tusc2	3	0.0085038	0.016209	0.965515	371	1
Zmym4	3	0.0085343	0.016267	0.965515	372	2
Fam114a2	3	0.008549	0.016293	0.965515	373	1
C1ra	3	0.008567	0.016321	0.965515	374	2
Ylpm1	3	0.0086374	0.016447	0.965515	375	2
Tmem64	3	0.0086395	0.016451	0.965515	376	1
Sis	3	0.0086609	0.016488	0.965515	377	2
Olfr464	3	0.0086797	0.016518	0.965515	378	2
Gm2022	3	0.0086847	0.016526	0.965515	379	1
mmu-mir-3084-2	3	0.0087222	0.016605	0.965515	380	2
Olfr1499	3	0.0087299	0.01662	0.965515	381	1
Vmn1r57	3	0.0087529	0.016661	0.965515	382	2
Rnf148	3	0.0087742	0.016699	0.965515	383	2
Tprgl	3	0.0087751	0.016699	0.965515	384	1
Ccnd1	3	0.0087837	0.016715	0.965515	385	2
Osbpl3	3	0.0088121	0.016761	0.965515	386	2
Sbf1	3	0.0088203	0.016775	0.965515	387	1
Vmn2r108	3	0.0089025	0.016922	0.965515	388	2
Gimap7	3	0.0089108	0.016936	0.965515	389	1
NonTargetingControlGuideForMouse_0054	1	0.0089374	0.016981	0.965515	390	1
Emg1	3	0.008956	0.017014	0.965515	391	1
Upk3bl	3	0.0089742	0.017051	0.965515	392	2
Aoc2	3	0.008979	0.017057	0.965515	393	2
Lmod3	3	0.009003	0.017104	0.965515	394	2
Nudt17	3	0.0090366	0.017152	0.965515	395	2
Slc26a4	3	0.0090464	0.017168	0.965515	396	1
Galnt9	3	0.0090916	0.017243	0.965515	397	2
Zfp668	3	0.0091368	0.01732	0.965515	398	1
Iffo1	3	0.009182	0.017396	0.965515	399	1
mmu-mir-6382	4	0.0092161	0.017452	0.965515	400	2
Gria3	3	0.0092272	0.017474	0.965515	401	1
Adamtsl3	3	0.0092724	0.017556	0.965515	402	1
Senp8	3	0.009288	0.01758	0.965515	403	2
Olfr141	3	0.0093176	0.017636	0.965515	404	1
Morf4l2	3	0.0093416	0.017681	0.965515	405	2
Rarb	3	0.0093628	0.017717	0.965515	406	1
Cln5	3	0.009408	0.017796	0.965515	407	1
Nfkbia	3	0.009415	0.017808	0.965515	408	2
Fam155a	3	0.0094493	0.01787	0.965515	409	2
Acadvl	3	0.0094532	0.017876	0.965515	410	1
Slmo2	3	0.0094984	0.017953	0.965515	411	1
Olfr847	3	0.0095436	0.018019	0.965515	412	1
Mpp4	3	0.0096169	0.018151	0.965515	413	2
Dpm3	3	0.009634	0.01819	0.965515	414	1
Hp	3	0.0096714	0.018262	0.965515	415	2
Oas2	3	0.0096792	0.018278	0.965515	416	1
Mybl1	3	0.0097211	0.01836	0.965515	417	2
Etnppl	3	0.0097244	0.018365	0.965515	418	1
NonTargetingControlGuideForMouse_0973	1	0.0097561	0.018418	0.965515	419	1
Cpvl	3	0.0097696	0.018439	0.965515	420	1
Tmem130	3	0.0097908	0.018467	0.965515	421	2
Mllt3	3	0.0098599	0.018585	0.965515	422	1
Gm10024	3	0.0098859	0.018631	0.965515	423	2
Nfyb	3	0.0099051	0.018666	0.965515	424	1
Alg11	3	0.009921	0.018698	0.965515	425	2
Klk8	3	0.0099411	0.01873	0.965515	426	2
Kcnc4	3	0.0099503	0.018748	0.965515	427	1
NonTargetingControlGuideForMouse_0425	1	0.0099532	0.01875	0.965515	428	1
Il17b	3	0.0099562	0.018753	0.965515	429	2
Dpysl5	3	0.0099955	0.018835	0.965515	430	1
4930529M08Rik	3	0.010041	0.018911	0.965515	431	1
Catsperb	3	0.010042	0.018914	0.965515	432	2
Golph3l	3	0.010077	0.018983	0.965515	433	2
Grm2	3	0.010086	0.018996	0.965515	434	2
Xrra1	3	0.010093	0.019007	0.965515	435	2
Utp11l	3	0.010131	0.019072	0.965515	436	1
Cuedc2	3	0.010221	0.019217	0.965515	437	1
Fam131a	3	0.010267	0.019295	0.965515	438	1
Klk6	3	0.010312	0.019374	0.965515	439	1
Lck	3	0.010352	0.01944	0.965515	440	2
Ctc1	3	0.010357	0.019449	0.965515	441	2
Zfp217	3	0.010378	0.019482	0.965515	442	2
Timm8a1	3	0.010393	0.019506	0.965515	443	2
Palm	3	0.010402	0.019522	0.965515	444	1
Gm14151	3	0.010445	0.019599	0.965515	445	2
Pde6a	3	0.010447	0.019602	0.965515	446	1
Ghsr	3	0.010471	0.019638	0.965515	447	2
Snph	3	0.010492	0.019672	0.965515	448	1
Nudt11	3	0.010512	0.019707	0.965515	449	2
Eif2b1	3	0.010538	0.019752	0.965515	450	1
Dlgap1	3	0.010553	0.019782	0.965515	451	2
Brca2	3	0.010583	0.019833	0.965515	452	1
Lsmd1	3	0.010628	0.019916	0.965515	453	1
Gm7534	3	0.010647	0.019946	0.965515	454	2
Stxbp1	3	0.010683	0.020003	0.965515	455	2
Neil3	3	0.010693	0.020021	0.965515	456	2
NonTargetingControlGuideForMouse_0169	1	0.010711	0.020051	0.965515	457	1
Acvr1b	3	0.010718	0.020064	0.965515	458	2
Zfp457	3	0.010763	0.020148	0.965515	459	1
Coq7	3	0.010782	0.020168	0.965515	460	2
Bag6	3	0.010808	0.020214	0.965515	461	2
Fam124b	3	0.010899	0.020363	0.965515	462	1
Cmtm2a	3	0.010939	0.020436	0.965515	463	2
Olfr1537	3	0.010944	0.020444	0.965515	464	1
Hfm1	3	0.010945	0.020445	0.965515	465	2
Spink5	3	0.010997	0.02053	0.965515	466	2
Muc1	3	0.011034	0.020595	0.965515	467	1
Map4k4	3	0.011071	0.020666	0.965515	468	2
NonTargetingControlGuideForMouse_0303	1	0.011075	0.020672	0.965515	469	1
Fev	3	0.011079	0.020679	0.965515	470	1
2010012O05Rik	3	0.011125	0.020756	0.965515	471	1
Zfp639	3	0.011151	0.020798	0.965515	472	2
Haus7	3	0.011215	0.020913	0.965515	473	1
Cbln1	3	0.01126	0.020979	0.965515	474	1
Cers6	3	0.011305	0.021056	0.965515	475	2
Zranb1	3	0.01135	0.021132	0.965515	476	1
Hc	3	0.011395	0.021205	0.965515	477	1
Enc1	3	0.011421	0.021247	0.965515	478	2
Sprr4	3	0.011434	0.021275	0.965515	479	2
Mta2	3	0.01144	0.021286	0.965515	480	1
Fam109a	3	0.011486	0.02137	0.965515	481	2
Olfr870	3	0.011531	0.021443	0.965515	482	1
Olfr541	3	0.011576	0.021528	0.965515	483	1
Rab5a	3	0.011621	0.02161	0.965515	484	2
Teddm1	3	0.011656	0.02167	0.965515	485	2
Gys1	3	0.011666	0.021688	0.965515	486	1
Slc25a47	3	0.011694	0.021732	0.965515	487	2
Rad9a	3	0.011711	0.02176	0.965515	488	1
Sigirr	3	0.011756	0.021842	0.965515	489	1
Bpifb6	3	0.011759	0.021846	0.965515	490	2
Zfp458	3	0.011792	0.021885	0.965515	491	2
mmu-mir-615	4	0.011803	0.021904	0.965515	492	1
Ghitm	3	0.011841	0.021967	0.965515	493	2
Fancc	3	0.011847	0.021976	0.965515	494	1
mmu-mir-467a-4	1	0.011848	0.021977	0.965515	495	1
Trim67	3	0.011892	0.022053	0.965515	496	1
Tyms	3	0.011937	0.022131	0.965515	497	1
Tusc5	3	0.011967	0.022189	0.965515	498	2
NonTargetingControlGuideForMouse_0760	1	0.01197	0.022193	0.965515	499	1
Spata21	3	0.011982	0.02221	0.965515	500	1
AF366264	3	0.011989	0.022222	0.965515	501	2
Kdm5c	3	0.012016	0.022274	0.965515	502	2
Ocstamp	3	0.012058	0.022341	0.965515	503	2
Pnkd	3	0.012072	0.022365	0.965515	504	1
Cd53	3	0.012077	0.02237	0.965515	505	2
Crybb2	3	0.012117	0.022439	0.965515	506	1
Klk1b21	3	0.012162	0.022509	0.965515	507	1
Zfp91	3	0.012193	0.022562	0.965515	508	2
Map4	3	0.012208	0.022582	0.965515	509	1
Cyp3a57	3	0.012215	0.022594	0.965515	510	2
Gm5458	3	0.012253	0.022655	0.965515	511	1
Klrg1	3	0.012287	0.022707	0.965515	512	2
Nudt15	3	0.012293	0.02272	0.965515	513	2
H2-M10.4	3	0.012298	0.022729	0.965515	514	1
Morc3	3	0.012332	0.022781	0.965515	515	2
mmu-mir-669d-2	4	0.012348	0.022814	0.965515	516	2
Anapc10	3	0.01236	0.022836	0.965515	517	2
NonTargetingControlGuideForMouse_0907	1	0.012379	0.022873	0.965515	518	1
1700013F07Rik	3	0.012388	0.022893	0.965515	519	2
Tcn2	3	0.012433	0.022974	0.965515	520	1
Pus7l	3	0.012444	0.022992	0.965515	521	2
Qrsl1	3	0.012478	0.023056	0.965515	522	1
Hmgn1	3	0.012494	0.023086	0.965515	523	2
Wnk1	3	0.012523	0.023132	0.965515	524	1
Tram1l1	3	0.012614	0.023298	0.965515	525	1
Crygf	3	0.012659	0.023375	0.965515	526	1
Slc9a2	3	0.012669	0.023392	0.965515	527	2
Gpr128	3	0.012674	0.023404	0.965515	528	2
Ndufv1	3	0.012686	0.02342	0.965515	529	2
Col9a3	3	0.012702	0.023454	0.965515	530	2
Atp13a2	3	0.012704	0.023456	0.965515	531	1
Spaca7	3	0.012719	0.023481	0.965515	532	2
Nudt1	3	0.012736	0.02351	0.965515	533	2
Traf5	3	0.012749	0.023532	0.965515	534	1
Tbc1d16	3	0.012804	0.023641	0.965515	535	2
Itgb2	3	0.012839	0.023698	0.965515	536	2
Psmd4	3	0.012884	0.023769	0.965515	537	1
Trappc6a	3	0.01289	0.023779	0.965515	538	2
Nol9	3	0.013019	0.02401	0.965515	539	1
Panx3	3	0.013027	0.024025	0.965515	540	2
Ube2m	3	0.013038	0.024046	0.965515	541	2
Nrde2	3	0.01311	0.024155	0.965515	542	1
Eif1a	3	0.013153	0.024236	0.965515	543	2
Ccr4	3	0.013155	0.024244	0.965515	544	1
Trp53	3	0.013158	0.024248	0.965515	545	2
Mfap5	3	0.013181	0.024287	0.965515	546	2
Polr3gl	3	0.013245	0.024395	0.965515	547	2
Mpo	3	0.01329	0.024469	0.965515	548	1
Ttc1	3	0.013303	0.024492	0.965515	549	2
NonTargetingControlGuideForMouse_0241	1	0.013334	0.02455	0.965515	550	1
Olfr1225	3	0.013335	0.024553	0.965515	551	1
Paf1	3	0.013372	0.024608	0.965515	552	2
St3gal6	3	0.01338	0.024621	0.965515	553	1
Slc24a5	3	0.013401	0.024654	0.965515	554	2
Epm2a	3	0.013425	0.024695	0.965515	555	1
Chtf8	3	0.013447	0.024738	0.965515	556	2
Vdr	3	0.013465	0.024772	0.965515	557	2
Mllt4	3	0.01347	0.024781	0.965515	558	1
Tln2	3	0.013515	0.024848	0.965515	559	1
mmu-mir-6240	4	0.013545	0.024907	0.965515	560	1
Rnasel	3	0.01356	0.024929	0.965515	561	1
9030617O03Rik	3	0.013599	0.024998	0.965515	562	2
Elac2	3	0.013605	0.025011	0.965515	563	1
Ttc28	3	0.013607	0.025013	0.965515	564	2
Crhr1	3	0.013616	0.025022	0.965515	565	2
Slc20a2	3	0.013628	0.025041	0.965515	566	2
Wnt9a	3	0.01365	0.025079	0.965515	567	1
Tmc5	3	0.013716	0.025202	0.965515	568	2
Gm15816	3	0.013741	0.025247	0.965515	569	1
Gpr162	3	0.013786	0.025323	0.965515	570	1
Srpx2	3	0.013816	0.025381	0.965515	571	2
Cers2	3	0.013831	0.025408	0.965515	572	1
Duox2	3	0.013833	0.025411	0.965515	573	2
Gm757	3	0.01388	0.025498	0.965515	574	2
Galntl6	3	0.013916	0.025564	0.965515	575	2
Gm3238	3	0.013921	0.025572	0.965515	576	1
Kctd5	3	0.013927	0.025585	0.965515	577	2
Nod1	3	0.013987	0.025686	0.965515	578	2
Prtg	3	0.014011	0.025726	0.965515	579	1
Rnf39	3	0.01404	0.025765	0.965515	580	2
Wbp11	3	0.014056	0.02579	0.965515	581	1
NonTargetingControlGuideForMouse_0352	1	0.014107	0.025879	0.965515	582	1
NonTargetingControlGuideForMouse_0244	1	0.014122	0.025911	0.965515	583	1
Olfr1039	3	0.014141	0.025942	0.965515	584	2
Dcaf5	3	0.014146	0.025952	0.965515	585	1
Nudt12	3	0.014191	0.026027	0.965515	586	1
Il1f5	3	0.014224	0.026089	0.965515	587	2
Tubgcp6	3	0.014236	0.026107	0.965515	588	1
Pcsk6	3	0.014278	0.026187	0.965515	589	2
Vmn2r88	3	0.014281	0.026192	0.965515	590	1
Reg3g	3	0.014326	0.026272	0.965515	591	1
Olfr987	3	0.014332	0.026279	0.965515	592	2
E4f1	3	0.01435	0.026309	0.965515	593	2
Mast3	3	0.014416	0.026419	0.965515	594	2
Lrrc61	3	0.014428	0.026437	0.965515	595	2
Cox5b	3	0.01444	0.026454	0.965515	596	2
mmu-mir-344g	4	0.014445	0.026464	0.965515	597	1
Fam214a	3	0.014452	0.026477	0.965515	598	2
Mettl1	3	0.014507	0.026565	0.965515	599	1
Il33	3	0.014518	0.02659	0.965515	600	2
Edc4	3	0.014548	0.026644	0.965515	601	2
Paxbp1	3	0.014552	0.026648	0.965515	602	1
C8a	3	0.01462	0.026767	0.965515	603	2
Cnksr3	3	0.014642	0.026794	0.965515	604	1
Olfr1496	3	0.014681	0.026869	0.965515	605	2
Pbxip1	3	0.014687	0.026878	0.965515	606	1
Hmgcs2	3	0.014705	0.026912	0.965515	607	2
1700123I01Rik	3	0.014717	0.026936	0.965515	608	2
Prps1l1	3	0.014732	0.026958	0.965515	609	1
Klhl14	3	0.014748	0.026989	0.965515	610	2
Muc19	3	0.01476	0.027008	0.965515	611	2
Crebl2	3	0.014777	0.027033	0.965515	612	1
Rom1	3	0.014822	0.027092	0.965515	613	1
Usp40	3	0.014845	0.027125	0.965515	614	2
Dgat1	3	0.014867	0.027159	0.965515	615	1
Brinp2	3	0.0149	0.027211	0.965515	616	2
Cyp2c70	3	0.014912	0.027229	0.965515	617	1
Podxl	3	0.014936	0.027273	0.965515	618	2
Ankib1	3	0.014948	0.027294	0.965515	619	2
NonTargetingControlGuideForMouse_0819	1	0.014971	0.027331	0.965515	620	1
H2-Q2	3	0.015002	0.027379	0.965515	621	1
Palm2	3	0.015022	0.027418	0.965515	622	2
Sema4b	3	0.015047	0.027457	0.965515	623	1
Mtfr1l	3	0.015092	0.027535	0.965515	624	1
Lrif1	3	0.015114	0.027574	0.965515	625	2
Pdxdc1	3	0.015137	0.02761	0.965515	626	1
Tceanc	3	0.01515	0.02763	0.965515	627	2
Spink8	3	0.015175	0.027677	0.965515	628	2
Lman2	3	0.015227	0.027757	0.965515	629	1
Btbd9	3	0.015237	0.027774	0.965515	630	2
Cebpa	3	0.015272	0.027831	0.965515	631	1
NonTargetingControlGuideForMouse_0375	1	0.01529	0.027862	0.965515	632	1
Slc7a5	3	0.015317	0.027905	0.965515	633	1
Pip4k2c	3	0.015348	0.027954	0.965515	634	2
Patl1	3	0.015385	0.028029	0.965515	635	2
Psen1	3	0.015397	0.02805	0.965515	636	2
1700018F24Rik	3	0.015452	0.028149	0.965515	637	1
Yrdc	3	0.015542	0.028297	0.965515	638	1
mmu-mir-3110	4	0.015546	0.028302	0.965515	639	2
Vmn2r63	3	0.015587	0.028367	0.965515	640	1
Bax	3	0.015596	0.028384	0.965515	641	2
Qtrt1	3	0.015677	0.028529	0.965515	642	1
Gm711	3	0.015683	0.028539	0.965515	643	2
NonTargetingControlGuideForMouse_0543	1	0.015714	0.02859	0.965515	644	1
Hvcn1	3	0.015721	0.028601	0.965515	645	2
Hspb1	3	0.015733	0.028622	0.965515	646	2
Vmn1r184	3	0.015765	0.028674	0.965515	647	2
Srpk2	3	0.01579	0.028719	0.965515	648	2
Slc4a7	3	0.015802	0.028742	0.965515	649	2
Acap3	3	0.015812	0.028764	0.965515	650	1
Scrt2	3	0.015827	0.028789	0.965515	651	2
mmu-mir-7659	4	0.015883	0.028882	0.965515	652	2
Olfr74	3	0.015902	0.028914	0.965515	653	1
Olfr1112	3	0.015943	0.028985	0.965515	654	2
E030019B06Rik	3	0.015947	0.028989	0.965515	655	1
Cpn2	3	0.015984	0.029056	0.965515	656	2
Ltb4r1	3	0.015992	0.029069	0.965515	657	1
Pcsk1n	3	0.015994	0.029072	0.965515	658	2
Taar4	3	0.01601	0.0291	0.965515	659	2
Srgap1	3	0.016037	0.029158	0.965515	660	1
Il9	3	0.016073	0.029224	0.965515	661	2
Olfr572	3	0.016082	0.02924	0.965515	662	1
Gphn	3	0.016127	0.029318	0.965515	663	1
4930550C14Rik	3	0.016142	0.029339	0.965515	664	2
Rap1gap	3	0.016172	0.029391	0.965515	665	1
Slc43a3	3	0.016217	0.029472	0.965515	666	1
Nedd4l	3	0.016262	0.029547	0.965515	667	1
Spink7	3	0.016301	0.029605	0.965515	668	2
Cym	3	0.016307	0.029616	0.965515	669	1
Ntn4	3	0.016352	0.029698	0.965515	670	1
Vmn1r54	3	0.016365	0.029724	0.965515	671	2
Kmt2d	3	0.016384	0.029756	0.965515	672	2
Gal	3	0.016397	0.029778	0.965515	673	1
Mapre3	3	0.016441	0.029858	0.965515	674	2
B4galt3	3	0.016442	0.02986	0.965515	675	1
BC016423	3	0.016457	0.029887	0.965515	676	2
Ccni	3	0.016487	0.029936	0.965515	677	1
Tmed2	3	0.016518	0.029992	0.965515	678	2
Smpd2	3	0.016563	0.030069	0.965515	679	2
Bach1	3	0.016577	0.030093	0.965515	680	2
NonTargetingControlGuideForMouse_0871	1	0.016609	0.030153	0.965515	681	1
Lrtm2	3	0.016622	0.030177	0.965515	682	1
mmu-mir-7657	4	0.01663	0.030191	0.965515	683	2
Dnajc18	3	0.016667	0.03025	0.965515	684	1
Slc25a42	3	0.016672	0.030259	0.965515	685	2
Shroom4	3	0.016712	0.030327	0.965515	686	1
Olfr1406	3	0.016717	0.030339	0.965515	687	2
Nsun2	3	0.016749	0.030387	0.965515	688	2
Olfr148	3	0.016757	0.030401	0.965515	689	1
Atp4b	3	0.016775	0.030434	0.965515	690	2
Map9	3	0.016802	0.030481	0.965515	691	1
Tmem52	3	0.016865	0.030583	0.965515	692	2
Gucy2f	3	0.016878	0.0306	0.965515	693	2
Cnot10	3	0.016892	0.030621	0.965515	694	1
Rbm7	3	0.016937	0.030705	0.965515	695	1
Wdr65	3	0.016982	0.030787	0.965515	696	1
Lama4	3	0.016982	0.030787	0.965515	697	2
mmu-mir-496a	4	0.017022	0.030851	0.965515	698	1
Dmtn	3	0.017072	0.030928	0.965515	699	1
Olfr355	3	0.017073	0.030929	0.965515	700	2
Vmn1r175	3	0.017117	0.03101	0.965515	701	1
NonTargetingControlGuideForMouse_0328	1	0.017124	0.031022	0.965515	702	1
Klhl18	3	0.017131	0.031033	0.965515	703	2
Tex28	3	0.017162	0.031083	0.965515	704	1
Arl15	3	0.017207	0.031146	0.965515	705	1
Otc	3	0.017242	0.031198	0.965515	706	2
Wnt5b	3	0.017252	0.031213	0.965515	707	1
Csdc2	3	0.017275	0.031255	0.965515	708	2
mmu-mir-883b	3	0.017294	0.031293	0.965515	709	2
Cct8l1	3	0.017296	0.031296	0.965515	710	1
Hoxa6	3	0.017341	0.031368	0.965515	711	1
Zfp114	2	0.017344	0.031371	0.965515	712	1
mmu-mir-6941	4	0.017381	0.031439	0.965515	713	1
Dnm1	3	0.017386	0.031448	0.965515	714	1
Olfr508	3	0.017431	0.031514	0.965515	715	1
Col1a2	3	0.017476	0.031595	0.965515	716	1
Bag5	3	0.017521	0.031668	0.965515	717	1
Atpif1	3	0.017557	0.031737	0.965515	718	2
Npr3	3	0.017566	0.031755	0.965515	719	1
Vmn2r11	3	0.017583	0.031782	0.965515	720	2
mmu-mir-463	4	0.017593	0.0318	0.965515	721	2
Ptprj	3	0.017656	0.031911	0.965515	722	1
Tmem45b	3	0.017676	0.031935	0.965515	723	2
Pom121l2	3	0.017701	0.031977	0.965515	724	1
Fam188a	3	0.017742	0.032042	0.965515	725	2
Ppp3r2	3	0.017746	0.032051	0.965515	726	1
Sh2d1b2	3	0.017748	0.032054	0.965515	727	2
C2cd5	3	0.017762	0.032075	0.965515	728	2
D17Wsu104e	3	0.017791	0.03211	0.965515	729	1
Ugt2a3	3	0.017821	0.032158	0.965515	730	2
Aptx	3	0.017835	0.032184	0.965515	731	2
Zfand1	3	0.017836	0.032184	0.965515	732	1
Olfr332	3	0.017868	0.032237	0.965515	733	2
Ccl7	3	0.017881	0.032258	0.965515	734	1
Snap47	3	0.017901	0.032289	0.965515	735	2
Serhl	3	0.017971	0.0324	0.965515	736	1
Atrn	3	0.017981	0.032415	0.965515	737	2
Thumpd3	3	0.018016	0.032483	0.965515	738	1
Dcdc2c	3	0.018061	0.032554	0.965515	739	1
Tbcc	3	0.018088	0.0326	0.965515	740	2
Ccdc8	3	0.018101	0.032626	0.965515	741	2
Tst	3	0.018105	0.032631	0.965515	742	1
LOC102308570	1	0.01811	0.032639	0.965515	743	1
Zdhhc20	3	0.018114	0.032646	0.965515	744	2
Prss12	3	0.01815	0.03271	0.965515	745	1
Lce3b	3	0.018154	0.032717	0.965515	746	2
Sod1	3	0.018195	0.032795	0.965515	747	1
Areg	3	0.018205	0.032811	0.965515	748	2
S100a14	3	0.01824	0.032864	0.965515	749	1
Hykk	3	0.018262	0.032902	0.965515	750	2
Dnase1l1	3	0.018275	0.032925	0.965515	751	2
Spink3	3	0.018322	0.032998	0.965515	752	2
Snx25	3	0.01833	0.033015	0.965515	753	1
Osgepl1	3	0.018342	0.033033	0.965515	754	2
Eri3	3	0.018375	0.033096	0.965515	755	1
Map3k6	3	0.018396	0.033132	0.965515	756	2
Mmaa	3	0.01842	0.03317	0.965515	757	2
Tas2r117	3	0.018423	0.033173	0.965515	758	2
NonTargetingControlGuideForMouse_0361	1	0.018458	0.033234	0.965515	759	1
Ammecr1l	3	0.018465	0.033243	0.965515	760	1
Krtap4-16	3	0.01851	0.033309	0.965515	761	1
Trpv3	3	0.018572	0.033419	0.965515	762	2
Mettl16	3	0.0186	0.033466	0.965515	763	1
Znrf3	3	0.018632	0.03352	0.965515	764	2
Slc6a1	3	0.018645	0.03354	0.965515	765	1
NonTargetingControlGuideForMouse_0711	1	0.018656	0.033557	0.965515	766	1
Gm13124	3	0.018687	0.033613	0.965515	767	2
Hcfc1	3	0.018693	0.033625	0.965515	768	2
Siah1a	3	0.018721	0.033671	0.965515	769	2
Sncaip	3	0.018727	0.033686	0.965515	770	2
Gatad2b	3	0.018734	0.033697	0.965515	771	1
Slc15a5	3	0.018755	0.033729	0.965515	772	2
Mylk4	3	0.018768	0.033753	0.965515	773	2
Gabbr2	3	0.018779	0.033772	0.965515	774	1
Gm11570	3	0.018824	0.033844	0.965515	775	1
Dmrtc1b	3	0.018869	0.03392	0.965515	776	1
E330017A01Rik	3	0.01887	0.033921	0.965515	777	2
Faim3	3	0.018904	0.033967	0.965515	778	2
Syt12	3	0.018911	0.033981	0.965515	779	2
Lhb	3	0.018914	0.033985	0.965515	780	1
Olfr1258	3	0.018925	0.034004	0.965515	781	2
Slc22a6	3	0.018959	0.034064	0.965515	782	1
Olfr418-ps1	3	0.018993	0.034114	0.965515	783	2
Emp3	3	0.019014	0.034148	0.965515	784	2
Srsf12	3	0.01902	0.034159	0.965515	785	2
Naif1	3	0.019049	0.034204	0.965515	786	1
Nbeal1	3	0.019061	0.03423	0.965515	787	2
Apobr	3	0.019075	0.034256	0.965515	788	2
Stxbp5	3	0.019082	0.034265	0.965515	789	2
Zdhhc22	3	0.019139	0.034348	0.965515	790	1
Atp6ap2	3	0.019183	0.034432	0.965515	791	1
Txndc11	3	0.019228	0.034505	0.965515	792	1
mmu-mir-1264	4	0.019231	0.03451	0.965515	793	2
1700125H20Rik	3	0.019318	0.03466	0.965515	794	1
Rs1	3	0.019363	0.034732	0.965515	795	1
Lipa	3	0.019364	0.034733	0.965515	796	2
Nckap1	3	0.019371	0.034747	0.965515	797	2
Lpar5	3	0.019408	0.034809	0.965515	798	1
Slc39a6	3	0.019412	0.034816	0.965515	799	2
mmu-mir-1952	4	0.019415	0.034819	0.965515	800	1
Shisa5	3	0.019453	0.034888	0.965515	801	1
Kcnk1	3	0.019474	0.034924	0.965515	802	2
Arhgap32	3	0.019498	0.034963	0.965515	803	1
Best3	3	0.019516	0.03499	0.965515	804	2
Vill	3	0.019537	0.035027	0.965515	805	2
Rnf144b	3	0.019543	0.035039	0.965515	806	1
Srm	3	0.019587	0.035112	0.965515	807	2
Kctd3	3	0.019606	0.03515	0.965515	808	2
Dyrk2	3	0.019627	0.035185	0.965515	809	2
Fam195a	3	0.019717	0.035341	0.965515	810	2
Plk3	3	0.019722	0.035353	0.965515	811	1
4930562C15Rik	3	0.019724	0.035354	0.965515	812	2
Wipi1	3	0.019767	0.035429	0.965515	813	2
Elmod2	3	0.019787	0.03546	0.965515	814	2
4930505A04Rik	3	0.019812	0.035504	0.965515	815	2
NonTargetingControlGuideForMouse_0826	1	0.019823	0.035521	0.965515	816	1
Ddx19a	3	0.019835	0.035541	0.965515	817	2
Cntn6	3	0.019842	0.035554	0.965515	818	2
H2bfm	3	0.019857	0.035575	0.965515	819	1
Cnnm4	3	0.019947	0.035716	0.965515	820	1
Ubqlnl	3	0.019991	0.0358	0.965515	821	1
Sox17	3	0.019996	0.035809	0.965515	822	2
Gpsm2	3	0.020036	0.035875	0.965515	823	1
Slc38a10	3	0.020081	0.03595	0.965515	824	1
Acyp2	3	0.020122	0.03602	0.965515	825	2
Zeb1	3	0.020126	0.036023	0.965515	826	1
Mas1	3	0.020165	0.036094	0.965515	827	2
Pdk2	3	0.020171	0.036101	0.965515	828	1
Fut9	3	0.020216	0.036177	0.965515	829	1
Babam1	3	0.020221	0.03619	0.965515	830	2
Mpg	3	0.020261	0.036249	0.965515	831	1
Cherp	3	0.020306	0.036328	0.965515	832	1
Arih1	3	0.020327	0.036364	0.965515	833	2
Prl7d1	3	0.02035	0.036409	0.965515	834	1
Krt42	3	0.02039	0.036484	0.965515	835	2
Abcc2	3	0.02044	0.036567	0.965515	837	1
Bhlhe40	3	0.02044	0.036566	0.965515	836	2
Adamts9	3	0.020485	0.036644	0.965515	838	1
mmu-mir-1961	4	0.02049	0.036656	0.965515	839	1
Trmt11	3	0.020603	0.036841	0.965515	840	2
Nme6	3	0.020617	0.036865	0.965515	841	2
Nipsnap1	3	0.02062	0.036868	0.965515	842	1
Tssk4	3	0.020664	0.036946	0.965515	843	1
Pdcd10	3	0.020674	0.036963	0.965515	844	2
Mapt	3	0.020709	0.037019	0.965515	845	1
D3Bwg0562e	3	0.020752	0.037083	0.965515	846	2
Ccdc80	3	0.020754	0.037085	0.965515	847	1
Rnpepl1	3	0.020773	0.037117	0.965515	848	2
Lgr5	3	0.02078	0.037132	0.965515	849	2
Fryl	3	0.020788	0.037145	0.965515	850	2
mmu-mir-7090	4	0.020788	0.037147	0.965515	851	2
NonTargetingControlGuideForMouse_0479	1	0.020793	0.037154	0.965515	852	1
Wasf1	3	0.020799	0.037164	0.965515	853	1
Kif2c	3	0.020844	0.037236	0.965515	854	1
Foxl1	3	0.020889	0.037317	0.965515	855	1
Gm382	3	0.020923	0.037376	0.965515	856	2
Sun1	3	0.020933	0.037391	0.965515	857	1
Card14	3	0.020945	0.037409	0.965515	858	2
Ambn	3	0.020959	0.037442	0.965515	859	2
Ddx3x	3	0.020978	0.037475	0.965515	860	1
Olfr1273-ps	3	0.021023	0.03755	0.965515	861	1
Smg5	3	0.021045	0.037586	0.965515	862	2
Phtf1	3	0.021068	0.037627	0.965515	863	1
4933403O08Rik	3	0.021102	0.037688	0.965515	864	2
Mmp3	3	0.02111	0.037699	0.965515	865	2
Zfp454	3	0.021113	0.037703	0.965515	866	1
4933434I20Rik	3	0.021117	0.037708	0.965515	867	2
Phf21a	3	0.021158	0.037788	0.965515	868	1
Gas2l3	3	0.021181	0.037819	0.965515	869	2
Tspan1	3	0.021203	0.037857	0.965515	870	1
Fam110c	3	0.021203	0.037858	0.965515	871	2
Wbscr16	3	0.021246	0.037924	0.965515	872	2
Elfn1	3	0.021247	0.037926	0.965515	873	1
Gpx3	3	0.021261	0.037948	0.965515	874	2
Pnma5	3	0.021337	0.038071	0.965515	875	1
Gm614	3	0.021376	0.038138	0.965515	876	2
Eny2	3	0.021382	0.038146	0.965515	877	1
Lama1	3	0.021472	0.038299	0.965515	878	1
Gps2	3	0.021516	0.038382	0.965515	879	1
NonTargetingControlGuideForMouse_0064	1	0.021551	0.038442	0.965515	880	1
Gigyf1	3	0.021561	0.038454	0.965515	881	1
Arhgef3	3	0.021593	0.038519	0.965515	882	2
Ufl1	3	0.021606	0.038539	0.965515	883	1
Hist1h4m	2	0.021638	0.038594	0.965515	884	1
Gm13023	3	0.021651	0.038612	0.965515	885	1
1700011L22Rik	3	0.021662	0.03863	0.965515	886	2
Scn5a	3	0.021696	0.038684	0.965515	887	1
Ces1b	3	0.02176	0.03879	0.965515	888	2
A430105I19Rik	3	0.021785	0.038835	0.965515	889	1
Naa40	3	0.02183	0.038921	0.965515	890	1
Serpinb3c	3	0.021875	0.038999	0.965515	891	1
Ubxn2a	3	0.021906	0.039057	0.965515	892	2
Reps2	3	0.02192	0.039078	0.965515	893	1
NonTargetingControlGuideForMouse_0561	1	0.021961	0.039145	0.965515	894	1
Pla2g2f	3	0.021965	0.039151	0.965515	895	1
Olfr1411	3	0.021976	0.03917	0.965515	896	2
NonTargetingControlGuideForMouse_0616	1	0.021991	0.039192	0.965515	897	1
Olfr1137	3	0.021994	0.039197	0.965515	898	2
Prpf3	3	0.022009	0.039224	0.965515	899	1
Zfp94	3	0.022099	0.039366	0.965515	900	1
Usp16	3	0.022144	0.039441	0.965515	901	1
Tes	3	0.022189	0.039517	0.965515	902	1
Sbspon	3	0.022233	0.039594	0.965515	903	1
Stambpl1	3	0.022266	0.039649	0.965515	904	2
Star	3	0.022278	0.039665	0.965515	905	1
Ywhaz	3	0.022323	0.039742	0.965515	906	1
Abl1	3	0.022325	0.039744	0.965515	907	2
Zfp759	3	0.022368	0.039812	0.965515	908	1
Kcnj13	3	0.022413	0.039887	0.965515	909	1
Olfr1094	3	0.022421	0.039907	0.965515	910	2
Sprr2f	3	0.022443	0.039946	0.965515	911	2
Rnase10	3	0.02245	0.039958	0.965515	912	2
Lmo4	3	0.022457	0.039965	0.965515	913	1
1110037F02Rik	3	0.022476	0.040001	0.965515	914	2
Mrps33	3	0.022495	0.040035	0.965515	915	2
Prim2	3	0.022502	0.040046	0.965515	917	1
D930020B18Rik	3	0.022502	0.040046	0.965515	916	2
Zfp821	3	0.022517	0.040071	0.965515	918	2
Il17rb	3	0.022524	0.040082	0.965515	919	2
Spop	3	0.022546	0.040121	0.965515	920	2
Adam39	3	0.022547	0.040122	0.965515	921	1
Fnbp4	3	0.022569	0.040158	0.965515	922	2
Nim1	3	0.022591	0.040191	0.965515	923	2
Vdac1	3	0.022592	0.040194	0.965515	924	1
Ss18	3	0.022628	0.04025	0.965515	925	2
Mapk11	3	0.022637	0.040266	0.965515	926	1
Stx17	3	0.02265	0.040285	0.965515	927	2
Gm5549	3	0.022726	0.040412	0.965515	928	1
Tgfbr2	3	0.022732	0.040422	0.965515	929	2
Timd4	3	0.022771	0.040485	0.965515	930	1
Ralgapa2	2	0.022777	0.040497	0.965515	931	1
Zfp330	3	0.022791	0.040523	0.965515	932	2
Arhgef37	3	0.022799	0.04054	0.965515	933	2
Mum1	3	0.022816	0.040573	0.965515	934	1
Rpl34-ps1	3	0.022821	0.040585	0.965515	935	2
Pard3b	3	0.022858	0.040647	0.965515	936	2
Uggt1	3	0.022861	0.040652	0.965515	937	1
Ajuba	3	0.022866	0.04066	0.965515	938	2
Ccdc152	3	0.022888	0.040687	0.965515	939	2
Atp6ap1	3	0.022896	0.0407	0.965515	940	2
Itgbl1	3	0.022911	0.040725	0.965515	941	2
AU040320	3	0.022918	0.040732	0.965515	942	2
Vmn1r209	3	0.02295	0.040782	0.965515	943	1
Cntln	3	0.022963	0.040808	0.965515	944	2
Magi3	3	0.022995	0.040871	0.965515	945	1
Kctd21	3	0.02304	0.040946	0.965515	946	1
Rassf9	3	0.023085	0.041033	0.965515	947	1
Tdg	3	0.02309	0.041039	0.965515	948	2
Cldn22	3	0.023129	0.041105	0.965515	949	1
Klc4	3	0.023174	0.041176	0.965515	950	1
Fbxl22	3	0.023187	0.041201	0.965515	951	2
Caprin1	3	0.023199	0.041215	0.965515	952	2
Fam72a	3	0.023219	0.041255	0.965515	953	1
Spats2	3	0.023264	0.041333	0.965515	954	1
Gpr160	3	0.023308	0.041414	0.965515	955	1
Krt27	3	0.023323	0.041439	0.965515	956	2
Mapk9	3	0.02333	0.04145	0.965515	957	2
Ndrg2	3	0.023345	0.041481	0.965515	958	2
Sdhd	3	0.023353	0.041497	0.965515	959	2
Etnk2	3	0.023443	0.041656	0.965515	960	1
Lhfpl5	3	0.023451	0.04167	0.965515	961	2
Btg1	3	0.023487	0.041739	0.965515	962	1
Naf1	3	0.023532	0.041814	0.965515	963	1
Epas1	3	0.023564	0.041857	0.965515	964	2
Cdk5r1	3	0.023571	0.041867	0.965515	965	2
Fam53b	3	0.023579	0.041876	0.965515	966	2
C3ar1	3	0.023609	0.041937	0.965515	967	2
Chadl	3	0.023647	0.042006	0.965515	968	2
Mepce	3	0.023667	0.042037	0.965515	969	1
Fads2	3	0.023711	0.04211	0.965515	970	1
Gfpt2	3	0.023756	0.042189	0.965515	971	1
mmu-mir-7002	4	0.023829	0.042314	0.965515	972	1
BC003965	3	0.023844	0.042338	0.965515	973	2
mmu-mir-873a	4	0.023864	0.042375	0.965515	974	2
Zfp46	3	0.023882	0.042408	0.965515	975	2
Dcun1d4	3	0.023913	0.042461	0.965515	976	2
Alpl	3	0.023935	0.042497	0.965515	977	1
Prl2c1	3	0.023943	0.042515	0.965515	978	2
Tmem192	3	0.023955	0.042534	0.965515	979	2
Slc16a14	3	0.023974	0.042568	0.965515	980	2
Slfn4	3	0.02398	0.042577	0.965515	981	1
Fam120a	3	0.024004	0.04262	0.965515	982	2
Nudt6	3	0.024019	0.042643	0.965515	983	2
1700037H04Rik	3	0.024025	0.042649	0.965515	984	1
Pex19	3	0.024069	0.04272	0.965515	985	1
mmu-mir-10a	4	0.024105	0.042787	0.965515	986	2
Anapc15	3	0.024159	0.042877	0.965515	987	1
Bcl2l14	3	0.024164	0.042887	0.965515	988	2
mmu-mir-7094-2	3	0.024203	0.042943	0.965515	989	2
Impg1	3	0.024204	0.042943	0.965515	990	1
Tprn	3	0.024226	0.04298	0.965515	991	2
Olfr826	3	0.024248	0.04302	0.965515	992	1
Cdh6	3	0.024249	0.043021	0.965515	993	2
Timm17b	3	0.024264	0.043044	0.965515	994	2
Errfi1	3	0.024279	0.043063	0.965515	995	2
Zfp938	3	0.024293	0.043083	0.965515	996	1
Wdr52	3	0.024338	0.043157	0.965515	997	1
Gjb3	3	0.024383	0.043234	0.965515	998	2
Fam71f2	3	0.024387	0.043239	0.965515	999	2
Efcab4b	3	0.024417	0.043279	0.965515	1000	2
Psmb1	3	0.024425	0.043294	0.965515	1001	2
Bche	3	0.024427	0.043297	0.965515	1002	1
Zfp664	3	0.024472	0.043376	0.965515	1003	1
Cmtm7	3	0.024525	0.043464	0.965515	1004	2
Ap1s2	3	0.024562	0.043518	0.965515	1005	1
Olfr1014	3	0.024587	0.043564	0.965515	1006	2
Brcc3	3	0.024606	0.043595	0.965515	1007	1
Clec12b	3	0.02461	0.043603	0.965515	1008	2
mmu-mir-6986	4	0.024663	0.043681	0.965515	1009	1
Masp1	3	0.024679	0.043707	0.965515	1010	2
Olfr658	3	0.024696	0.043734	0.965515	1011	1
Ttc36	3	0.024785	0.043871	0.965515	1012	1
Vmn2r85	3	0.02483	0.043947	0.965515	1014	2
Npsr1	3	0.02483	0.043947	0.965515	1013	1
Tom1l1	3	0.024857	0.043984	0.965515	1015	2
H2-D1	3	0.024865	0.043997	0.965515	1016	2
Vps37d	3	0.024875	0.044014	0.965515	1017	1
9430023L20Rik	3	0.024919	0.044085	0.965515	1018	1
N4bp2l1	3	0.024919	0.044085	0.965515	1019	2
Syngr3	3	0.024964	0.044162	0.965515	1020	1
Usp18	3	0.024981	0.044189	0.965515	1021	2
mmu-mir-6367	4	0.025028	0.04427	0.965515	1022	2
Rbbp4	3	0.02504	0.044294	0.965515	1023	2
Aida	3	0.025054	0.044319	0.965515	1024	1
Rcor3	3	0.025075	0.044356	0.965515	1025	2
Aldh1a2	3	0.025082	0.044376	0.965515	1026	2
Rnf126	3	0.025098	0.044402	0.965515	1028	1
Cnot6l	3	0.025098	0.044401	0.965515	1027	2
Col25a1	3	0.025106	0.044417	0.965515	1029	2
Soga2	3	0.025188	0.044556	0.965515	1030	1
Olfr699	3	0.025231	0.044623	0.965515	1031	2
Cadps2	3	0.025232	0.044625	0.965515	1032	1
Snx18	3	0.025285	0.044711	0.965515	1033	2
Lce3d	1	0.025342	0.044806	0.965515	1034	1
Trem3	3	0.025371	0.044857	0.965515	1035	2
Dnpep	3	0.025411	0.044915	0.965515	1036	1
Slc25a24	3	0.025456	0.044977	0.965515	1037	1
Ptpn12	3	0.025489	0.045033	0.965515	1038	2
Diablo	3	0.025501	0.045053	0.965515	1039	1
2410015M20Rik	3	0.025545	0.045114	0.965515	1040	1
9630033F20Rik	3	0.025551	0.045122	0.965515	1041	2
Cyb5r3	3	0.02559	0.045192	0.965515	1042	1
mmu-mir-7661	4	0.025615	0.045231	0.965515	1043	1
Fn1	3	0.025635	0.045265	0.965515	1044	1
1110012L19Rik	3	0.025679	0.045344	0.965515	1045	1
NonTargetingControlGuideForMouse_0204	1	0.025721	0.045404	0.965515	1046	1
Lrfn2	3	0.025764	0.045483	0.965515	1047	2
Ms4a10	3	0.025769	0.045492	0.965515	1048	1
Olfr603	3	0.025811	0.045571	0.965515	1049	2
NonTargetingControlGuideForMouse_0480	1	0.025827	0.045597	0.965515	1050	1
Abhd16b	3	0.025843	0.045622	0.965515	1051	2
Hnrnpc	3	0.025858	0.045652	0.965515	1052	1
Nefh	3	0.025898	0.045714	0.965515	1053	2
Vsig4	3	0.025921	0.045753	0.965515	1054	2
Ybx2	3	0.025948	0.045795	0.965515	1055	1
Arntl	3	0.025953	0.045805	0.965515	1056	2
Timp3	3	0.025992	0.045871	0.965515	1057	1
AU041133	3	0.026008	0.045899	0.965515	1058	2
Serpina9	3	0.026037	0.045949	0.965515	1059	1
Tmed8	3	0.026072	0.046009	0.965515	1060	2
BC017643	3	0.026082	0.04603	0.965515	1061	1
mmu-mir-205	4	0.02609	0.046043	0.965515	1062	1
Soat1	3	0.026111	0.046082	0.965515	1063	2
Col8a1	3	0.026126	0.046101	0.965515	1064	1
Tor3a	3	0.026127	0.046103	0.965515	1065	2
Syne4	3	0.026143	0.046135	0.965515	1066	2
Rhof	3	0.026171	0.04617	0.965515	1067	1
Rpl38	3	0.026216	0.046241	0.965515	1068	1
Misp	3	0.02626	0.046318	0.965515	1069	1
Gpr165	3	0.02627	0.046337	0.965515	1070	2
Ficd	3	0.026305	0.046394	0.965515	1071	1
Slc25a3	3	0.02635	0.046468	0.965515	1072	1
Cyp4f39	3	0.026358	0.046487	0.965515	1073	2
Klhl28	3	0.026394	0.046543	0.965515	1074	1
D630045J12Rik	3	0.026397	0.046549	0.965515	1075	2
Mmadhc	3	0.026439	0.046628	0.965515	1076	1
NonTargetingControlGuideForMouse_0611	1	0.026448	0.046642	0.965515	1077	1
Foxh1	3	0.026484	0.04671	0.965515	1078	1
NonTargetingControlGuideForMouse_0783	1	0.026524	0.046779	0.965515	1079	1
Pan3	3	0.026529	0.046785	0.965515	1080	1
Pcdhb22	3	0.026541	0.04681	0.965515	1081	2
Pramel4	3	0.026549	0.04682	0.965515	1082	2
Lrrc57	3	0.026613	0.046933	0.965515	1083	2
Cachd1	3	0.026618	0.04694	0.965515	1084	1
Tmed7	3	0.026653	0.046999	0.965515	1085	2
Tcap	3	0.026663	0.047016	0.965515	1086	1
Tmem8c	3	0.026707	0.047086	0.965515	1087	1
Sim1	3	0.026725	0.047117	0.965515	1088	2
Rprm	3	0.026752	0.047161	0.965515	1089	1
Trappc8	3	0.026797	0.047228	0.965515	1090	1
Lrfn5	3	0.026841	0.04731	0.965515	1091	1
Olfr930	3	0.026886	0.047386	0.965515	1092	2
Arhgap42	3	0.026931	0.047453	0.965515	1093	1
Cyp4b1	3	0.026966	0.047503	0.965515	1094	2
Olfr1512	3	0.026974	0.047518	0.965515	1095	2
Ppdpf	3	0.026975	0.047521	0.965515	1096	1
Defb23	3	0.027006	0.04757	0.965515	1097	2
Tmem65	3	0.027071	0.047674	0.965515	1098	2
Gm5414	3	0.027109	0.047731	0.965515	1099	1
Lin37	3	0.027135	0.047781	0.965515	1100	2
Ccs	3	0.027154	0.047814	0.965515	1101	1
B4galnt2	3	0.027198	0.047892	0.965515	1102	1
Vmn1r44	3	0.027224	0.04794	0.965515	1103	2
Atxn1l	3	0.027243	0.047966	0.965515	1104	1
Ednrb	3	0.027273	0.048016	0.965515	1105	2
1700094D03Rik	3	0.027288	0.048034	0.965515	1106	1
Ociad2	3	0.027313	0.048073	0.965515	1107	2
Rnmt	3	0.027329	0.048103	0.965515	1108	2
Ctse	3	0.027332	0.048112	0.965515	1109	1
Slc39a10	3	0.027382	0.048191	0.965515	1110	2
Kmt2c	3	0.027418	0.04825	0.965515	1111	2
Mrps6	3	0.02743	0.048267	0.965515	1112	2
Themis3	3	0.027443	0.048288	0.965515	1113	2
Vps4b	3	0.027466	0.048332	0.965515	1114	1
Polr3k	3	0.027511	0.048413	0.965515	1115	1
Unc13a	3	0.027532	0.048442	0.965515	1116	2
Rbm45	3	0.027552	0.048478	0.965515	1117	2
Angpt1	3	0.027556	0.048485	0.965515	1118	1
Ube2l3	3	0.027629	0.048597	0.965515	1119	2
mmu-mir-7086	4	0.027631	0.048599	0.965515	1120	2
Lmo3	3	0.027645	0.048626	0.965515	1121	1
Lix1	3	0.027686	0.048687	0.965515	1122	2
Spef2	3	0.02769	0.048696	0.965515	1123	1
Ffar4	3	0.027711	0.048731	0.965515	1124	2
Kif1b	3	0.027734	0.048772	0.965515	1125	1
Nucks1	3	0.027779	0.048853	0.965515	1126	1
Gstp1	3	0.027801	0.048886	0.965515	1127	2
Htatip2	3	0.027868	0.048991	0.965515	1128	1
Sema6a	3	0.027931	0.0491	0.965515	1129	2
Pla2g15	3	0.027957	0.049146	0.965515	1130	1
Atp2b4	3	0.027964	0.049157	0.965515	1131	2
Gbp2b	3	0.027997	0.049217	0.965515	1132	2
Lamtor4	3	0.028002	0.049226	0.965515	1133	1
Rb1	3	0.028009	0.049239	0.965515	1134	2
Klhl25	3	0.028021	0.049254	0.965515	1135	2
Sebox	3	0.028054	0.049316	0.965515	1136	2
Gprasp2	3	0.028095	0.049394	0.965515	1137	2
Cited1	3	0.028111	0.049419	0.965515	1138	2
Reep2	3	0.028161	0.049504	0.965515	1139	2
Ifng	3	0.028181	0.049537	0.965515	1140	1
Aipl1	3	0.028218	0.049597	0.965515	1141	2
Zfp764	3	0.028225	0.049615	0.965515	1142	1
Sbsn	3	0.02827	0.049689	0.965515	1143	1
Olfr248	3	0.028292	0.049724	0.965515	1144	2
Clec4g	3	0.028314	0.049764	0.965515	1145	1
Anxa10	3	0.028317	0.049766	0.965515	1146	2
Tmem221	3	0.028359	0.049825	0.965515	1147	1
Trip4	3	0.028399	0.049899	0.965515	1148	2
Arhgef25	3	0.028448	0.049986	0.965515	1149	1
mmu-mir-503	4	0.028452	0.049993	0.965515	1150	2
Ncoa1	3	0.028473	0.050033	0.965515	1151	2
Eci1	3	0.028486	0.050055	0.965515	1152	2
Slc25a41	3	0.028493	0.050068	0.965515	1153	1
Ogfod3	3	0.028498	0.050077	0.965515	1154	2
D630023F18Rik	3	0.028523	0.050115	0.965515	1155	2
Mitd1	3	0.028531	0.050128	0.965515	1156	2
Angptl7	3	0.028538	0.050136	0.965515	1157	1
Zfp184	3	0.028582	0.050217	0.965515	1158	1
Fam84a	3	0.028589	0.050229	0.965515	1159	2
Fam83g	3	0.028627	0.050292	0.965515	1160	1
Pax4	3	0.028671	0.050376	0.965515	1161	1
Pgls	3	0.028705	0.05045	0.965515	1162	2
Fosl1	3	0.028716	0.050467	0.965515	1163	1
Defb6	3	0.028755	0.050521	0.965515	1164	2
Lysmd1	3	0.028761	0.05053	0.965515	1165	1
NonTargetingControlGuideForMouse_0402	1	0.028768	0.050548	0.965515	1166	1
Ccdc70	3	0.02885	0.050645	0.965515	1167	1
Eps8l1	3	0.028894	0.050688	0.965515	1168	1
Zyg11a	3	0.028939	0.050724	0.965515	1169	1
mmu-mir-1187	2	0.029032	0.050814	0.965515	1170	1
Pknox1	3	0.029073	0.050844	0.965515	1171	1
Sgcg	3	0.029117	0.050878	0.965515	1173	1
NonTargetingControlGuideForMouse_0755	1	0.029117	0.050877	0.965515	1172	1
St8sia3	3	0.029162	0.050926	0.965515	1174	1
Plekhh2	3	0.029207	0.050961	0.965515	1175	1
Tgfbrap1	3	0.029251	0.051006	0.965515	1176	1
C1rb	3	0.029296	0.051048	0.965515	1177	1
mmu-mir-7655	4	0.029297	0.051048	0.965515	1178	1
Pvalb	3	0.029385	0.051124	0.965515	1179	1
Slc44a3	3	0.029429	0.051165	0.965515	1180	1
Atp2b3	3	0.029608	0.051318	0.965515	1181	1
Slamf1	3	0.029652	0.051364	0.965515	1182	1
Olfr1388	3	0.029697	0.051408	0.965515	1183	1
Mcpt4	3	0.029742	0.051447	0.965515	1184	1
Clec5a	3	0.029786	0.051481	0.965515	1185	1
Soga3	3	0.029875	0.051549	0.965515	1186	1
Slc35d2	3	0.02992	0.051589	0.965515	1187	1
Azi1	3	0.029964	0.051628	0.965515	1188	1
Cldn17	3	0.030054	0.051709	0.965515	1189	1
Olfr456	3	0.030098	0.051745	0.965515	1190	1
mmu-mir-191	4	0.030127	0.05177	0.965515	1191	1
Hhip	3	0.030187	0.051822	0.965515	1192	1
4931423N10Rik	3	0.030232	0.051858	0.965515	1193	1
Elk4	3	0.030276	0.0519	0.965515	1194	1
Magea5	3	0.030366	0.051972	0.965515	1195	1
Nav2	3	0.03041	0.052015	0.965515	1196	1
Sec23ip	3	0.030499	0.052096	0.965515	1197	1
Trmt12	3	0.030588	0.052168	0.965515	1198	1
Klra10	3	0.030677	0.052261	0.965515	1199	1
Irx1	3	0.030722	0.052297	0.965515	1200	1
Cd63	3	0.030811	0.052382	0.965515	1201	1
Glra1	3	0.030856	0.052424	0.965515	1202	1
Arl8a	3	0.0309	0.052466	0.965515	1203	1
Map7d2	3	0.030945	0.052504	0.965515	1204	1
Slc37a4	3	0.030989	0.05254	0.965515	1205	1
Gm8882	1	0.031072	0.052602	0.965515	1206	1
mmu-mir-323	4	0.031075	0.052605	0.965515	1207	1
NonTargetingControlGuideForMouse_0859	1	0.031118	0.052646	0.965515	1208	1
Rax	3	0.031123	0.052649	0.965515	1209	1
Phlda3	3	0.031212	0.052724	0.965515	1210	1
Kremen1	3	0.031256	0.052762	0.965515	1211	1
Gsx1	3	0.031301	0.052805	0.965515	1212	1
Canx	3	0.031345	0.052845	0.965515	1213	1
Gm4975	3	0.031479	0.052972	0.965515	1214	1
Cdkn1c	3	0.031524	0.053011	0.965515	1215	1
NonTargetingControlGuideForMouse_0659	1	0.031527	0.053014	0.965515	1216	1
Pdxp	3	0.031568	0.053049	0.965515	1217	1
Slc25a32	3	0.031613	0.053076	0.965515	1218	1
Kcna10	3	0.031657	0.053116	0.965515	1219	1
Miip	3	0.031702	0.053148	0.965515	1220	1
Padi2	3	0.031835	0.053254	0.965515	1221	1
Tomm70a	3	0.03188	0.053291	0.965515	1222	1
Sprr2a1	2	0.031898	0.053303	0.965515	1223	1
Cst11	3	0.031924	0.053325	0.965515	1224	1
Xlr5c	3	0.031969	0.053369	0.965515	1225	1
Alkbh7	3	0.032013	0.053401	0.965515	1226	1
mmu-mir-20b	4	0.032022	0.053411	0.965515	1227	1
Dupd1	3	0.032191	0.053551	0.965515	1228	1
NonTargetingControlGuideForMouse_0858	1	0.032225	0.053581	0.965515	1229	1
Vmn2r120	3	0.032369	0.053712	0.965515	1230	1
Hook3	3	0.032414	0.053751	0.965515	1231	1
Rpl36al	3	0.032458	0.053795	0.965515	1232	1
NonTargetingControlGuideForMouse_0501	1	0.032467	0.053798	0.965515	1233	1
Stk10	3	0.032503	0.053832	0.965515	1234	1
Drc1	3	0.032547	0.053868	0.965515	1235	1
Eif4e2	3	0.032592	0.053902	0.965515	1236	1
mmu-mir-7682	4	0.032622	0.053928	0.965515	1237	2
Lcn3	3	0.032681	0.053993	0.965515	1238	1
Ddx27	3	0.032814	0.054113	0.965515	1239	1
Olfr968	3	0.032903	0.054189	0.965515	1240	1
Papl	3	0.032992	0.054277	0.965515	1241	1
Ints9	3	0.033036	0.054318	0.965515	1242	1
Cd5l	3	0.033081	0.054356	0.965515	1243	1
Cdca3	3	0.033125	0.054403	0.965515	1244	1
Mcpt1	3	0.03317	0.054445	0.965515	1245	1
Gzmn	3	0.033214	0.054481	0.965515	1246	1
Olfr616	3	0.033303	0.054563	0.965515	1247	1
Apom	3	0.033348	0.054599	0.965515	1248	1
Dmkn	3	0.033481	0.054703	0.965515	1249	1
Hoxc11	3	0.033526	0.05474	0.965515	1250	1
Plxdc1	3	0.03357	0.05478	0.965515	1251	1
Chst14	3	0.033615	0.054824	0.965515	1252	1
Ccdc7	3	0.033659	0.054863	0.965515	1253	1
mmu-mir-147	4	0.033678	0.054875	0.965515	1254	1
Lrrc7	3	0.033703	0.054898	0.965515	1255	1
Gm2042	2	0.033747	0.054936	0.965515	1256	1
mmu-mir-23b	4	0.033847	0.055024	0.965515	1257	2
Pdcd2	3	0.033881	0.055052	0.965515	1258	1
Mtl5	3	0.033926	0.055094	0.965515	1259	1
Nedd8	3	0.034015	0.05518	0.965515	1260	1
Il1a	3	0.034059	0.055217	0.965515	1261	1
Peli2	3	0.034104	0.055249	0.965515	1262	1
Ms4a13	3	0.034148	0.055292	0.965515	1263	1
Gstcd	3	0.034237	0.055358	0.965515	1264	1
Popdc3	3	0.034281	0.055397	0.965515	1265	1
Zc3h8	3	0.03437	0.055462	0.965515	1266	1
Gsc	3	0.034415	0.055505	0.965515	1267	1
Ifitm10	3	0.034503	0.055585	0.965515	1268	1
Pomgnt1	3	0.034548	0.055618	0.965515	1269	1
Tarbp2	3	0.034592	0.055652	0.965515	1270	1
Brsk2	3	0.034637	0.055692	0.965515	1271	1
NonTargetingControlGuideForMouse_0796	1	0.03465	0.055701	0.965515	1272	1
Coprs	3	0.034726	0.055762	0.965515	1273	1
NonTargetingControlGuideForMouse_0900	1	0.034741	0.055773	0.965515	1274	1
Car8	3	0.03477	0.055799	0.965515	1275	1
Lim2	3	0.034814	0.055839	0.965515	1276	1
NonTargetingControlGuideForMouse_0541	1	0.034847	0.055869	0.965515	1277	1
Gm4297	3	0.034859	0.055878	0.965515	1278	1
Trim12c	3	0.034903	0.055914	0.965515	1279	1
Abcf3	3	0.034948	0.05596	0.965515	1280	1
Zcwpw1	3	0.034992	0.055997	0.965515	1281	1
Rasa4	3	0.035037	0.056036	0.965515	1282	1
Ogfrl1	3	0.035081	0.056076	0.965515	1283	1
Scgb1b19	2	0.035087	0.056081	0.965515	1284	1
Fgd5	3	0.03517	0.056158	0.965515	1285	1
mmu-mir-6896	4	0.035192	0.056178	0.965515	1286	2
Olfr1434	1	0.035242	0.056216	0.965515	1287	1
Adrbk2	3	0.035259	0.056227	0.965515	1288	1
P2rx1	3	0.035303	0.056268	0.965515	1289	1
NonTargetingControlGuideForMouse_0853	1	0.035317	0.056277	0.965515	1290	1
Olfr1204	3	0.035347	0.056299	0.965515	1291	1
C2cd4b	3	0.035392	0.056346	0.965515	1292	1
Hist3h2ba	3	0.035436	0.056377	0.965515	1293	1
Vmn1r177	3	0.035525	0.056448	0.965515	1294	1
Dennd5a	3	0.035569	0.056484	0.965515	1295	1
mmu-mir-6355	4	0.035578	0.056493	0.965515	1296	2
Zfp473	3	0.035614	0.05652	0.965515	1297	1
Mtch2	3	0.03568	0.056574	0.965515	1298	1
mmu-mir-2137	4	0.035741	0.056629	0.965515	1299	2
Adam10	3	0.035747	0.056632	0.965515	1300	1
Ppp1r18	3	0.035791	0.056672	0.965515	1301	1
Cadm2	3	0.035836	0.056715	0.965515	1302	1
Tdrd12	3	0.03588	0.056743	0.965515	1303	1
Vmn1r73	3	0.035969	0.056813	0.965515	1304	1
Apol11a	3	0.036013	0.056852	0.965515	1305	1
Litaf	3	0.036058	0.056888	0.965515	1306	1
Timm10b	3	0.036102	0.056925	0.965515	1307	1
Vti1b	3	0.036146	0.05697	0.965515	1308	1
Fv1	3	0.036235	0.057045	0.965515	1309	1
Nfe2	3	0.03628	0.057081	0.965515	1310	1
NonTargetingControlGuideForMouse_0768	1	0.036318	0.057112	0.965515	1311	1
Aox1	3	0.036368	0.057158	0.965515	1312	1
Dio1	3	0.036413	0.057197	0.965515	1313	1
Slc25a36	3	0.036457	0.057242	0.965515	1314	1
Fth1	3	0.036501	0.057285	0.965515	1315	1
Shank2	3	0.03659	0.05736	0.965515	1316	1
Gpr21	3	0.036723	0.057466	0.965515	1317	1
Dpp4	3	0.036768	0.057502	0.965515	1318	1
Vmn2r122	3	0.036812	0.057539	0.965515	1319	1
Adcy2	3	0.036945	0.057648	0.965515	1320	1
Gpx5	3	0.036989	0.057682	0.965515	1321	1
Map4k3	3	0.037034	0.057722	0.965515	1322	1
NonTargetingControlGuideForMouse_0831	1	0.037076	0.057758	0.965515	1323	1
Gabra5	3	0.037078	0.05776	0.965515	1324	1
Amh	3	0.037167	0.057848	0.965515	1325	1
Actn3	3	0.037211	0.05788	0.965515	1326	1
Ptch2	3	0.037256	0.057917	0.965515	1327	1
Fermt1	3	0.0373	0.057951	0.965515	1328	1
mmu-mir-546	4	0.037338	0.05799	0.965515	1329	1
Tor4a	3	0.037344	0.057996	0.965515	1330	1
Kdm2b	3	0.037389	0.058035	0.965515	1331	1
Sec61a2	3	0.037477	0.058109	0.965515	1332	1
Igf2bp3	3	0.037522	0.058146	0.965515	1333	1
Olfr881	3	0.03761	0.058214	0.965515	1334	1
NonTargetingControlGuideForMouse_0448	1	0.037622	0.05822	0.965515	1335	1
Samd3	3	0.037655	0.058254	0.965515	1336	1
mmu-mir-7688	4	0.037691	0.058286	0.965515	1337	1
Prkrip1	3	0.037743	0.058331	0.965515	1338	1
A830018L16Rik	3	0.037788	0.058378	0.965515	1339	1
Hoxa9	3	0.037832	0.058408	0.965515	1340	1
Olfr1129	3	0.037965	0.058537	0.965515	1341	1
Gpr82	3	0.038009	0.058574	0.965515	1342	1
Olfr1099	3	0.038054	0.058617	0.965515	1343	1
P2ry14	3	0.038098	0.058661	0.965515	1344	1
Zbtb45	3	0.038142	0.058693	0.965515	1345	1
Dsg3	3	0.038186	0.058725	0.965515	1346	1
Adra1b	3	0.038231	0.058769	0.965515	1347	1
Erbb2ip	3	0.038275	0.058812	0.965515	1348	1
Ryr1	3	0.038319	0.05885	0.965515	1349	1
Atp6ap1l	3	0.038364	0.058887	0.965515	1350	1
NonTargetingControlGuideForMouse_0159	1	0.038365	0.058888	0.965515	1351	1
Far1	3	0.038408	0.058931	0.965515	1352	1
Fpr1	3	0.038452	0.058964	0.965515	1353	1
Dcdc2b	3	0.038497	0.058996	0.965515	1354	1
Kcnj15	3	0.038541	0.059034	0.965515	1355	1
Sh3kbp1	3	0.038585	0.059066	0.965515	1356	1
Olfr918	3	0.03863	0.059105	0.965515	1357	1
Olfr531	3	0.038674	0.059144	0.965515	1358	1
Ints2	3	0.038718	0.059184	0.965515	1359	1
Magea8	3	0.038762	0.059225	0.965515	1360	1
Zfp503	3	0.038829	0.059284	0.965515	1361	1
Klhl5	3	0.038829	0.059284	0.965515	1362	1
NonTargetingControlGuideForMouse_0782	1	0.038895	0.059341	0.965515	1363	1
Dnajb7	3	0.038895	0.059341	0.965515	1364	1
Gtpbp10	3	0.03894	0.059385	0.965515	1365	1
Fez1	3	0.038984	0.059427	0.965515	1366	1
Tmprss2	3	0.039073	0.059497	0.965515	1367	1
Gimap6	3	0.039117	0.059536	0.965515	1368	1
NonTargetingControlGuideForMouse_0279	1	0.039123	0.059542	0.965515	1369	1
Ift43	3	0.03925	0.059652	0.965515	1370	1
Vmn2r75	3	0.039294	0.059686	0.965515	1371	1
BC049635	3	0.039338	0.059725	0.965515	1372	1
NonTargetingControlGuideForMouse_0945	1	0.039426	0.059799	0.965515	1373	1
Dynll1	3	0.039515	0.059871	0.965515	1374	1
Ly6f	3	0.03956	0.059916	0.965515	1375	1
Gja4	3	0.039604	0.059961	0.965515	1376	1
Tmem52b	3	0.039648	0.059997	0.965515	1377	1
Olfr33	3	0.039692	0.060038	0.965515	1378	1
Nod2	3	0.039781	0.060114	0.965515	1379	1
Slc6a20a	3	0.039825	0.060148	0.965515	1380	1
Ccdc15	3	0.03987	0.060187	0.965515	1381	1
Ier5l	3	0.039914	0.060223	0.965515	1382	1
Cma2	3	0.040002	0.060303	0.965515	1383	1
NonTargetingControlGuideForMouse_0067	1	0.040063	0.060352	0.965515	1384	1
Vgll2	3	0.040091	0.060377	0.965515	1385	1
Kcng4	3	0.040135	0.060416	0.965515	1386	1
Csf1	3	0.040179	0.060453	0.965515	1387	1
Skil	3	0.040224	0.06049	0.965515	1388	1
Rpl3	3	0.040268	0.060535	0.965515	1389	1
Nsdhl	3	0.040312	0.06057	0.965515	1390	1
Oxgr1	3	0.040356	0.060602	0.965515	1391	1
mmu-mir-222	4	0.040358	0.060603	0.965515	1392	2
Pkp4	3	0.040445	0.060686	0.965515	1393	1
Magohb	3	0.040489	0.060723	0.965515	1394	1
Chst3	3	0.040533	0.060759	0.965515	1395	1
Hspa8	3	0.040578	0.060799	0.965515	1396	1
Pla2g4c	3	0.040622	0.060835	0.965515	1397	1
Spred1	3	0.040666	0.060877	0.965515	1398	1
Defa2	1	0.04079	0.060991	0.965515	1399	1
AI848285	3	0.040799	0.060999	0.965515	1400	1
NonTargetingControlGuideForMouse_0562	1	0.040806	0.061002	0.965515	1401	1
Rgs20	3	0.040843	0.061028	0.965515	1402	1
B3gnt1	3	0.040887	0.061063	0.965515	1403	1
Ptplad1	3	0.041064	0.061237	0.965515	1404	1
Pitpnm1	3	0.041108	0.061269	0.965515	1405	1
Speg	3	0.041153	0.061305	0.965515	1406	1
mmu-mir-219a-2	4	0.041222	0.06136	0.965515	1407	1
Vmn1r236	3	0.041241	0.061378	0.965515	1408	1
Dlx6	3	0.041285	0.061417	0.965515	1409	1
Kcnk3	3	0.04133	0.061451	0.965515	1410	1
Fads6	3	0.041374	0.061494	0.965515	1411	1
Ano5	3	0.041418	0.061535	0.965515	1412	1
Pcdha9	2	0.04151	0.061617	0.965515	1413	1
Zc3h6	3	0.041551	0.061651	0.965515	1414	1
Tti1	3	0.041595	0.061687	0.965515	1415	1
Zfp964	3	0.041639	0.06172	0.965515	1416	1
Cmklr1	3	0.041683	0.061756	0.965515	1417	1
Fxyd5	3	0.041816	0.061873	0.965515	1418	1
Shisa4	3	0.04186	0.061916	0.965515	1419	1
Eml5	3	0.041904	0.061963	0.965515	1420	1
Dscc1	3	0.041993	0.062055	0.965515	1421	1
Hibch	3	0.042037	0.062094	0.965515	1422	1
Sec61b	3	0.042081	0.062129	0.965515	1423	1
1700123O20Rik	3	0.042125	0.062161	0.965515	1424	1
Slc34a1	3	0.04217	0.062199	0.965515	1425	1
Prkaa2	3	0.042258	0.062267	0.965515	1426	1
2610305D13Rik	3	0.042346	0.062341	0.965515	1427	1
Asgr1	3	0.04239	0.062385	0.965515	1428	1
Cmc2	3	0.042435	0.062422	0.965515	1429	1
Pipox	3	0.042479	0.062464	0.965515	1430	1
Zfc3h1	3	0.042523	0.062497	0.965515	1431	1
Sf3b5	3	0.042567	0.062533	0.965515	1432	1
mmu-mir-710	4	0.042629	0.062591	0.965515	1433	2
mmu-mir-670	4	0.042631	0.062592	0.965515	1434	1
Dusp13	3	0.042656	0.062611	0.965515	1435	1
Foxn1	3	0.042744	0.062688	0.965515	1436	1
Abcc10	3	0.042832	0.062765	0.965515	1437	1
Ilkap	3	0.042876	0.062802	0.965515	1438	1
Fzd8	3	0.042921	0.062836	0.965515	1439	1
Lipi	3	0.042965	0.062872	0.965515	1440	1
Trim55	3	0.043009	0.062909	0.965515	1441	1
Cecr5	3	0.043053	0.06295	0.965515	1442	1
Gpr173	3	0.043097	0.062992	0.965515	1443	1
Luzp1	3	0.043141	0.063028	0.965515	1444	1
Cyp51	3	0.043186	0.063071	0.965515	1445	1
Coa6	3	0.043274	0.06315	0.965515	1446	1
mmu-mir-143	4	0.043276	0.063154	0.965515	1447	1
Bsdc1	3	0.043362	0.06324	0.965515	1448	1
Doxl2	3	0.043406	0.063279	0.965515	1449	1
Cd180	3	0.043451	0.063313	0.965515	1450	1
Whrn	3	0.043495	0.063342	0.965515	1451	1
Fam50a	3	0.043539	0.063376	0.965515	1452	1
Emd	3	0.043583	0.063415	0.965515	1453	1
Mlst8	3	0.043627	0.063449	0.965515	1454	1
Tcp11	3	0.043671	0.063486	0.965515	1455	1
Ndufa8	3	0.043716	0.063535	0.965515	1456	1
Hist4h4	3	0.04376	0.063579	0.965515	1457	1
Asb6	3	0.043848	0.063668	0.965515	1458	1
NonTargetingControlGuideForMouse_0721	1	0.043883	0.063705	0.965515	1459	1
Nt5dc3	3	0.043892	0.063715	0.965515	1460	1
mmu-mir-7a-2	4	0.043921	0.06374	0.965515	1461	2
Ccnt1	3	0.043936	0.063753	0.965515	1462	1
Cyp2b23	3	0.04398	0.063795	0.965515	1463	1
Prss37	3	0.044025	0.063829	0.965515	1464	1
Arhgef2	3	0.044069	0.063876	0.965515	1465	1
Cox6b1	3	0.044157	0.063952	0.965515	1466	1
Cog5	3	0.044201	0.063988	0.965515	1467	1
NonTargetingControlGuideForMouse_0412	1	0.044232	0.064016	0.965515	1468	1
Brms1	3	0.044289	0.064067	0.965515	1469	1
Klra9	3	0.044333	0.064104	0.965515	1470	1
Lrrc4c	3	0.044422	0.064182	0.965515	1471	1
Tmod4	3	0.044466	0.064222	0.965515	1472	1
Zkscan14	3	0.04451	0.064259	0.965515	1473	1
Sel1l3	3	0.044554	0.0643	0.965515	1474	1
Folr1	3	0.044642	0.064385	0.965515	1475	1
4921539E11Rik	3	0.044686	0.064427	0.965515	1476	1
Lekr1	3	0.044731	0.064461	0.965515	1477	1
Tmie	3	0.044775	0.064505	0.965515	1478	1
Prg3	3	0.044819	0.064547	0.965515	1479	1
NonTargetingControlGuideForMouse_0330	1	0.044854	0.06458	0.965515	1480	1
Glyr1	3	0.044863	0.064591	0.965515	1481	1
A730008H23Rik	2	0.044892	0.064612	0.965515	1482	1
Tarm1	3	0.044907	0.064629	0.965515	1483	1
Trim59	3	0.044951	0.064662	0.965515	1484	1
Rab11fip2	3	0.044995	0.064694	0.965515	1485	1
Olfr1058	3	0.045039	0.064739	0.965515	1486	1
Rpp40	3	0.045128	0.064814	0.965515	1487	1
Agt	3	0.045216	0.064894	0.965515	1488	1
Plcl2	3	0.04526	0.064927	0.965515	1489	1
Ruvbl2	3	0.045304	0.064966	0.965515	1490	1
Nup62	3	0.045348	0.065002	0.965515	1491	1
C1qc	3	0.045392	0.06504	0.965515	1492	1
Ccm2l	3	0.045436	0.065084	0.965515	1493	1
Kcne4	3	0.04548	0.065121	0.965515	1494	1
Txndc12	3	0.045524	0.065163	0.965515	1495	1
NonTargetingControlGuideForMouse_0540	1	0.045597	0.065228	0.965515	1496	1
Lancl2	3	0.045613	0.065245	0.965515	1497	1
Ide	3	0.045657	0.065281	0.965515	1498	1
Olfr242	1	0.045687	0.06531	0.965515	1499	1
6820408C15Rik	3	0.045833	0.065437	0.965515	1500	1
Samd1	3	0.045877	0.065482	0.965515	1501	1
Slc22a16	3	0.045965	0.065553	0.965515	1502	1
NonTargetingControlGuideForMouse_0777	1	0.046066	0.065634	0.965515	1503	1
Rab11fip1	3	0.046097	0.065655	0.965515	1504	1
Sbk2	3	0.046142	0.065695	0.965515	1505	1
Sec22a	3	0.04623	0.065767	0.965515	1506	1
Zfp607	3	0.04645	0.065959	0.965515	1507	1
Fshb	3	0.046494	0.065999	0.965515	1508	1
mmu-mir-3067	4	0.04654	0.066041	0.965515	1509	2
Usp32	3	0.046582	0.066084	0.965515	1510	1
Tas1r3	3	0.04667	0.066167	0.965515	1511	1
Sftpc	3	0.046714	0.066204	0.965515	1512	1
Mybphl	3	0.046758	0.066242	0.965515	1513	1
Gm527	3	0.046847	0.066321	0.965515	1514	1
1700001P01Rik	3	0.046891	0.066363	0.965515	1515	1
Cux2	3	0.046935	0.066401	0.965515	1516	1
Arsi	3	0.047023	0.066481	0.965515	1517	1
Sac3d1	3	0.047067	0.066518	0.965515	1518	1
Zfp707	3	0.047155	0.066593	0.965515	1519	1
Arxes2	2	0.047172	0.066604	0.965515	1520	1
Axin2	3	0.047243	0.066661	0.965515	1521	1
mmu-mir-362	4	0.047286	0.066699	0.965515	1522	2
Cryzl1	3	0.047331	0.066732	0.965515	1523	1
Ube2q1	3	0.047419	0.066814	0.965515	1524	1
Cited2	3	0.047507	0.066887	0.965515	1525	1
Vegfc	3	0.047551	0.066931	0.965515	1526	1
Cldn18	3	0.047683	0.067043	0.965515	1527	1
Tsacc	3	0.047727	0.067085	0.965515	1528	1
Gpr26	3	0.047771	0.067125	0.965515	1529	1
Rab11a	3	0.047815	0.067166	0.965515	1530	1
Rnls	3	0.047859	0.067211	0.965515	1531	1
Slc10a1	3	0.047903	0.067249	0.965515	1532	1
Olfr78	3	0.047947	0.067288	0.965515	1533	1
mmu-mir-1948	4	0.047961	0.067301	0.965515	1534	1
Actn1	3	0.048035	0.06738	0.965515	1535	1
4930480E11Rik	3	0.048079	0.06742	0.965515	1536	1
Tet1	3	0.048123	0.067453	0.965515	1537	1
Eif2b5	3	0.048167	0.067498	0.965515	1538	1
Ifna5	3	0.048255	0.067564	0.965515	1539	1
Ccdc163	3	0.0483	0.067607	0.965515	1540	1
Slc25a15	3	0.048344	0.067645	0.965515	1541	1
Mpp5	3	0.048388	0.067686	0.965515	1542	1
mmu-mir-762	4	0.048422	0.067714	0.965515	1543	2
Ccnj	3	0.048454	0.06774	0.965515	1544	1
Zfp619	3	0.048454	0.06774	0.965515	1545	1
Emcn	3	0.04852	0.067806	0.965515	1546	1
mmu-mir-208a	4	0.048545	0.067829	0.965515	1547	1
As3mt	3	0.048564	0.06784	0.965515	1548	1
Pelp1	3	0.048608	0.067877	0.965515	1549	1
Olfr1164	3	0.048696	0.067957	0.965515	1550	1
Rgs22	3	0.04874	0.067994	0.965515	1551	1
Tsc22d4	3	0.048783	0.068028	0.965515	1552	1
Adam29	3	0.048827	0.068071	0.965515	1553	1
Eno1	3	0.048871	0.068109	0.965515	1554	1
mmu-mir-16-1	4	0.048896	0.068135	0.965515	1555	1
Pkmyt1	3	0.048915	0.068147	0.965515	1556	1
Gnb3	3	0.048959	0.068193	0.965515	1557	1
Uts2r	3	0.049047	0.068267	0.965515	1558	1
V1rd18	2	0.049095	0.068312	0.965515	1559	1
Ahsa2	3	0.049135	0.068346	0.965515	1560	1
Agtpbp1	3	0.049179	0.068377	0.965515	1561	1
Als2cl	3	0.049223	0.068421	0.965515	1562	1
Megf11	3	0.049267	0.068459	0.965515	1563	1
Thap2	3	0.049399	0.068581	0.965515	1564	1
Nrp2	3	0.049443	0.068626	0.965515	1565	1
Kcnh3	3	0.049487	0.068673	0.965515	1566	1
Tspan14	3	0.049531	0.068711	0.965515	1567	1
mmu-mir-718	4	0.049596	0.068768	0.965515	1568	1
Timm21	3	0.049663	0.06883	0.965515	1569	1
Adrb3	3	0.049707	0.06886	0.965515	1570	1
Prl3d2	3	0.049751	0.0689	0.965515	1572	1
NonTargetingControlGuideForMouse_0269	1	0.049751	0.0689	0.965515	1571	1
Trp53bp1	3	0.049795	0.068939	0.965515	1573	1
NonTargetingControlGuideForMouse_0312	1	0.049872	0.068993	0.965515	1574	1
Gga2	3	0.049883	0.069005	0.965515	1575	1
Nyap1	3	0.049927	0.069046	0.965515	1576	1
Wfdc6b	3	0.050015	0.069123	0.965515	1577	1
Gm20877	3	0.050059	0.069161	0.965515	1578	1
Tsn	3	0.050103	0.069201	0.965515	1579	1
mmu-mir-6997	4	0.050234	0.069301	0.965515	1580	2
Anapc16	3	0.050234	0.069302	0.965515	1581	1
Gm13102	1	0.050266	0.069334	0.965515	1582	1
Ift74	3	0.050366	0.069423	0.965515	1583	1
Lrrc52	3	0.05041	0.069458	0.965515	1584	1
Dusp5	3	0.050454	0.069504	0.965515	1585	1
Bcl2a1b	2	0.050484	0.069528	0.965515	1586	1
Lipe	3	0.050542	0.069573	0.965515	1587	1
Tmem27	3	0.050586	0.069617	0.965515	1588	1
Zfp341	3	0.05063	0.069657	0.965515	1589	1
Ppp3r1	3	0.050674	0.069698	0.965515	1590	1
Hoxb7	3	0.050718	0.069729	0.965515	1591	1
Rpl36a	3	0.050762	0.069769	0.965515	1592	1
Slc9a3r1	3	0.050806	0.069799	0.965515	1593	1
Lrrfip1	3	0.05085	0.069845	0.965515	1594	1
Olfr102	3	0.050894	0.06989	0.965515	1595	1
Fbxl4	3	0.050981	0.069962	0.965515	1596	1
mmu-mir-6397	4	0.051019	0.069994	0.965515	1597	2
Ntng1	3	0.051069	0.070029	0.965515	1598	1
NonTargetingControlGuideForMouse_0933	1	0.051077	0.070039	0.965515	1599	1
Abi1	3	0.051113	0.070069	0.965515	1600	1
Rimkla	3	0.051157	0.070107	0.965515	1601	1
Gm4745	3	0.051201	0.070148	0.965515	1602	1
Eif2s3x	3	0.051245	0.070184	0.965515	1603	1
1700092M07Rik	3	0.051333	0.070264	0.965515	1604	1
Slc29a2	3	0.051421	0.070339	0.965515	1605	1
Ptprq	3	0.051464	0.070374	0.965515	1606	1
Gm21950	3	0.051508	0.070409	0.965515	1607	1
Arhgef15	3	0.051552	0.070451	0.965515	1608	1
Olfr259	3	0.051596	0.070491	0.965515	1609	1
Sucla2	3	0.051728	0.070597	0.965515	1610	1
Rbbp9	3	0.051816	0.070683	0.965515	1611	1
Cyp4a10	3	0.05186	0.070717	0.965515	1612	1
AY358078	3	0.051903	0.070759	0.965515	1613	1
Hipk1	3	0.051947	0.070793	0.965515	1614	1
Odf3l1	3	0.051991	0.070836	0.965515	1615	1
Sprr1b	3	0.052035	0.070879	0.965515	1616	1
Ptprk	3	0.052079	0.070922	0.965515	1617	1
Mrgprb4	3	0.052123	0.070954	0.965515	1618	1
Zfp523	3	0.052211	0.071018	0.965515	1619	1
E230019M04Rik	3	0.052255	0.071056	0.965515	1620	1
Rbpms2	3	0.052298	0.071095	0.965515	1621	1
Gm12253	3	0.052342	0.071136	0.965515	1622	1
Tbxa2r	3	0.052386	0.071175	0.965515	1623	1
Tmem215	3	0.05243	0.07121	0.965515	1624	1
Olfr360	3	0.052474	0.071248	0.965515	1625	1
Vmn2r62	2	0.052492	0.071267	0.965515	1626	1
Tff2	3	0.052518	0.071285	0.965515	1627	1
Bcl9	3	0.052649	0.071407	0.965515	1628	1
Rdh7	3	0.052693	0.071438	0.965515	1629	1
Rsph3b	2	0.052699	0.071441	0.965515	1630	1
Tmx2	3	0.052737	0.07148	0.965515	1631	1
Rnf139	3	0.052781	0.07152	0.965515	1632	1
Slc35f6	3	0.052869	0.071596	0.965515	1633	1
Tceb1	3	0.052913	0.071641	0.965515	1634	1
mmu-mir-758	4	0.052919	0.071648	0.965515	1635	1
Cog2	3	0.053088	0.071788	0.965515	1636	1
Hist2h2ac	3	0.053132	0.071824	0.965515	1637	1
Cyp2t4	3	0.053264	0.071946	0.965515	1638	1
Trmt1	3	0.053307	0.071986	0.965515	1639	1
Slc15a3	3	0.053395	0.072067	0.965515	1640	1
Mapk15	3	0.053439	0.072102	0.965515	1641	1
2310050C09Rik	3	0.053483	0.072146	0.965515	1642	1
Tmem184b	3	0.053527	0.07218	0.965515	1643	1
Tada2a	3	0.05357	0.072233	0.965515	1644	1
Srr	3	0.053614	0.072267	0.965515	1645	1
Neb	3	0.053658	0.072301	0.965515	1646	1
Gm7257	3	0.053702	0.072334	0.965515	1647	1
Cox8a	3	0.053877	0.07248	0.965515	1648	1
Pramel3	3	0.053965	0.072547	0.965515	1649	1
mmu-mir-6985	4	0.053967	0.07255	0.965515	1650	1
Cyp2b9	3	0.054053	0.072624	0.965515	1651	1
Tmem204	3	0.054097	0.072668	0.965515	1652	1
Orm1	3	0.05414	0.072705	0.965515	1653	1
Olfr1395	3	0.054184	0.072737	0.965515	1654	1
Fam13c	3	0.054228	0.072772	0.965515	1655	1
NonTargetingControlGuideForMouse_0949	1	0.054253	0.072795	0.965515	1656	1
mmu-mir-7668	4	0.054258	0.072798	0.965515	1657	1
Olfr1389	3	0.054272	0.072809	0.965515	1658	1
Usp53	3	0.054316	0.07285	0.965515	1659	1
Ifne	3	0.054403	0.072931	0.965515	1660	1
Zbtb34	3	0.054447	0.072959	0.965515	1661	1
Tsr2	3	0.054491	0.072993	0.965515	1662	1
Inf2	3	0.054535	0.073033	0.965515	1663	1
NonTargetingControlGuideForMouse_0555	1	0.054541	0.073039	0.965515	1664	1
Helz	3	0.054579	0.073073	0.965515	1665	1
Gpx2	3	0.054622	0.073107	0.965515	1666	1
Tspan17	3	0.054666	0.073139	0.965515	1667	1
NonTargetingControlGuideForMouse_0489	1	0.054693	0.073168	0.965515	1668	1
BC107364	3	0.05471	0.073187	0.965515	1669	1
Glt25d1	3	0.054754	0.073227	0.965515	1670	1
Rnf222	3	0.054973	0.073427	0.965515	1671	1
Ttc9c	3	0.055017	0.073469	0.965515	1672	1
Opn3	3	0.05506	0.073501	0.965515	1673	1
Ndufb5	3	0.055104	0.073532	0.965515	1674	1
2017-09-09	3	0.055148	0.073573	0.965515	1675	1
NonTargetingControlGuideForMouse_0733	1	0.055193	0.073618	0.965515	1676	1
Olfr550	3	0.055236	0.073649	0.965515	1677	1
Bsx	3	0.055279	0.073678	0.965515	1678	1
Olfr1306	3	0.055367	0.073753	0.965515	1679	1
mmu-mir-5616	2	0.055412	0.073793	0.965515	1680	1
9430020K01Rik	3	0.055498	0.073872	0.965515	1681	1
Limch1	3	0.055586	0.073943	0.965515	1682	1
Ctbs	3	0.05563	0.073983	0.965515	1683	1
Josd2	3	0.055673	0.074029	0.965515	1684	1
Nmi	3	0.055717	0.074069	0.965515	1685	1
Nckap5	3	0.055761	0.074101	0.965515	1686	1
Stub1	3	0.055805	0.074143	0.965515	1687	1
0610009O20Rik	3	0.055849	0.074174	0.965515	1688	1
Timm44	3	0.055892	0.074209	0.965515	1689	1
Rab21	3	0.055936	0.07425	0.965515	1690	1
NonTargetingControlGuideForMouse_0109	1	0.055967	0.074284	0.965515	1691	1
Atp2c2	3	0.05598	0.074294	0.965515	1692	1
Art2b	3	0.056111	0.074398	0.965515	1693	1
Atp5g1	3	0.056286	0.074546	0.965515	1694	1
Fam217b	3	0.056374	0.074627	0.965515	1695	1
Uqcr11	3	0.056461	0.074696	0.965515	1696	1
NonTargetingControlGuideForMouse_0572	1	0.056497	0.074737	0.965515	1697	1
Samd11	3	0.056505	0.074741	0.965515	1698	1
Abo	3	0.056549	0.074778	0.965515	1699	1
Entpd2	3	0.056636	0.074846	0.965515	1700	1
Gm826	3	0.056724	0.07492	0.965515	1701	1
Idi2	3	0.056811	0.074996	0.965515	1702	1
Kpnb1	3	0.056899	0.075067	0.965515	1703	1
Aarsd1	3	0.056942	0.075108	0.965515	1704	1
Olfr916	3	0.056986	0.075152	0.965515	1705	1
2310057N15Rik	3	0.05703	0.075185	0.965515	1706	1
Slc34a2	3	0.057074	0.075218	0.965515	1707	1
Lrch2	3	0.057117	0.075258	0.965515	1708	1
5830403L16Rik	3	0.057205	0.07534	0.965515	1709	1
Fam63b	3	0.057249	0.075383	0.965515	1710	1
Ccp110	3	0.057292	0.075434	0.965515	1711	1
Ing1	3	0.057336	0.075472	0.965515	1712	1
Asic5	3	0.05738	0.075504	0.965515	1713	1
Olfr119	3	0.057423	0.075536	0.965515	1714	1
Fbxo24	3	0.057555	0.075647	0.965515	1715	1
Abcb8	3	0.057598	0.075684	0.965515	1716	1
Fsd1	3	0.057642	0.075722	0.965515	1717	1
BC117090	3	0.05773	0.075799	0.965515	1718	1
NonTargetingControlGuideForMouse_0353	1	0.057756	0.075821	0.965515	1719	1
Ccdc155	3	0.057773	0.075834	0.965515	1720	1
Pigq	3	0.057904	0.075957	0.965515	1721	1
Krt32	3	0.057948	0.075992	0.965515	1722	1
Rpl10a	3	0.057992	0.076026	0.965515	1723	1
Ltbp2	3	0.058035	0.076065	0.965515	1724	1
Ccdc6	3	0.058079	0.076102	0.965515	1725	1
Ccdc142	3	0.058123	0.076139	0.965515	1726	1
Ttc3	3	0.058167	0.076176	0.965515	1727	1
Ssr3	3	0.058254	0.076246	0.965515	1728	1
Olfr1118	3	0.058341	0.07632	0.965515	1729	1
Olfr924	3	0.058429	0.076381	0.965515	1730	1
Olfr872	3	0.058472	0.076415	0.965515	1731	1
Ap2a1	3	0.05856	0.076481	0.965515	1732	1
St3gal2	3	0.058604	0.076517	0.965515	1733	1
NonTargetingControlGuideForMouse_0275	1	0.05862	0.076529	0.965515	1734	1
Plekha8	3	0.058647	0.076559	0.965515	1735	1
Card9	3	0.058691	0.076595	0.965515	1736	1
Tmem40	3	0.058735	0.076632	0.965515	1737	1
Tbc1d30	3	0.058778	0.076676	0.965515	1738	1
Mthfsd	3	0.058866	0.076758	0.965515	1739	1
Rbm28	3	0.058953	0.076837	0.965515	1740	1
Crp	3	0.05904	0.076917	0.965515	1741	1
Fibp	3	0.059084	0.076957	0.965515	1742	1
Cldn9	3	0.059171	0.077041	0.965515	1743	1
Neurl4	3	0.059215	0.077079	0.965515	1744	1
Slc25a23	3	0.059302	0.077155	0.965515	1746	1
NonTargetingControlGuideForMouse_0843	1	0.059302	0.077155	0.965515	1745	1
Tmsb15a	3	0.059346	0.077188	0.965515	1747	1
Arfgef2	3	0.05939	0.077225	0.965515	1748	1
Scamp4	3	0.059521	0.077339	0.965515	1749	1
Col9a1	3	0.059608	0.077413	0.965515	1750	1
Mss51	3	0.059652	0.077444	0.965515	1751	1
Gfod2	3	0.059695	0.077474	0.965515	1752	1
2310042E22Rik	3	0.059739	0.077507	0.965515	1753	1
Baiap2l2	3	0.059783	0.07754	0.965515	1754	1
Vmn1r76	3	0.059826	0.077576	0.965515	1755	1
BC024139	3	0.05987	0.07761	0.965515	1756	1
Osbpl11	3	0.059957	0.077686	0.965515	1757	1
Pan2	3	0.060045	0.077749	0.965515	1758	1
Ptch1	3	0.060132	0.07781	0.965515	1759	1
Zfp697	3	0.060175	0.077853	0.965515	1760	1
Ddx46	3	0.060219	0.077887	0.965515	1761	1
Jsrp1	3	0.060263	0.07792	0.965515	1762	1
Bid	3	0.060306	0.07796	0.965515	1763	1
2017-09-14	3	0.06035	0.077997	0.965515	1764	1
Cer1	3	0.060394	0.078037	0.965515	1765	1
mmu-mir-1943	4	0.060465	0.078103	0.965515	1766	1
Slc7a7	3	0.060525	0.078156	0.965515	1767	1
mmu-mir-5046	4	0.060581	0.078199	0.965515	1768	1
Tfip11	3	0.060612	0.078225	0.965515	1769	1
NonTargetingControlGuideForMouse_0297	1	0.060621	0.078232	0.965515	1770	1
Manea	3	0.060655	0.078256	0.965515	1771	1
Eif4a3	3	0.060699	0.078294	0.965515	1772	1
Pycard	3	0.060743	0.078328	0.965515	1773	1
mmu-mir-1957a	4	0.06087	0.078423	0.965515	1774	1
Zfp386	3	0.060874	0.078423	0.965515	1775	1
Coa3	3	0.060917	0.078462	0.965515	1776	1
Mrps28	3	0.060961	0.078496	0.965515	1777	1
H2-Q4	3	0.061048	0.078574	0.965515	1778	1
Ticam2	3	0.061135	0.078648	0.965515	1779	1
Aldh1l1	3	0.061179	0.07868	0.965515	1780	1
Taar8a	3	0.061222	0.078723	0.965515	1781	1
Dmwd	3	0.06131	0.078784	0.965515	1782	1
Fam45a	3	0.061353	0.078821	0.965515	1783	1
Serpinb9e	3	0.061397	0.078861	0.965515	1784	1
Rad1	3	0.06144	0.078891	0.965515	1785	1
NonTargetingControlGuideForMouse_0700	1	0.06147	0.078922	0.965515	1786	1
2410018M08Rik	3	0.061484	0.078935	0.965515	1787	1
Plscr3	3	0.061528	0.078974	0.965515	1788	1
Pwp2	3	0.061571	0.079014	0.965515	1789	1
8030423J24Rik	3	0.061658	0.079084	0.965515	1790	1
Fam46a	3	0.061746	0.079155	0.965515	1791	1
BC049730	3	0.061789	0.079192	0.965515	1792	1
NonTargetingControlGuideForMouse_0617	1	0.061819	0.079216	0.965515	1793	1
H2-T23	3	0.061876	0.079262	0.965515	1794	1
Olfr1283	3	0.061964	0.079328	0.965515	1795	1
Prkar2a	3	0.062007	0.079357	0.965515	1796	1
Gjb5	3	0.062051	0.07939	0.965515	1797	1
Abcb11	3	0.062094	0.079431	0.965515	1798	1
Lrpprc	3	0.062181	0.079512	0.965515	1799	1
Oscar	3	0.062225	0.079552	0.965515	1800	1
Adck2	3	0.062312	0.079628	0.965515	1801	1
Syndig1	3	0.062356	0.079664	0.965515	1802	1
Rbm33	3	0.062399	0.079698	0.965515	1803	1
NonTargetingControlGuideForMouse_0153	1	0.06241	0.079711	0.965515	1804	1
Mad2l2	3	0.062443	0.079739	0.965515	1805	1
Alg2	3	0.062486	0.079778	0.965515	1806	1
Mdm1	3	0.06253	0.079812	0.965515	1807	1
NonTargetingControlGuideForMouse_0308	1	0.062607	0.079881	0.965515	1808	1
Lrfn4	3	0.062617	0.079891	0.965515	1809	1
D14Abb1e	3	0.062661	0.079924	0.965515	1810	1
Gm5640	3	0.062704	0.079961	0.965515	1811	1
P2rx7	3	0.062748	0.079996	0.965515	1812	1
NonTargetingControlGuideForMouse_0295	1	0.062789	0.080028	0.965515	1813	1
Olig1	3	0.062791	0.080029	0.965515	1814	1
Cyp2u1	3	0.062835	0.080066	0.965515	1815	1
Ltbp4	3	0.062922	0.080133	0.965515	1816	1
mmu-mir-3073a	2	0.06297	0.080177	0.965515	1817	1
mmu-mir-133a-1	4	0.063009	0.080209	0.965515	1818	1
Nrbp1	3	0.063053	0.080251	0.965515	1819	1
Krt17	3	0.063096	0.080281	0.965515	1820	1
Gm21943	1	0.063123	0.080301	0.965515	1821	1
Olfr1084	3	0.06314	0.08031	0.965515	1822	1
Eno4	3	0.063205	0.080363	0.965515	1824	1
Olfr784	3	0.063205	0.080363	0.965515	1823	1
Defa22	2	0.063205	0.080363	0.965515	1825	1
Dnajc10	3	0.063314	0.080466	0.965515	1826	1
Ttyh2	3	0.063358	0.080503	0.965515	1827	1
Rbp2	3	0.063401	0.080538	0.965515	1828	1
Phospho1	3	0.063445	0.080571	0.965515	1829	1
Rab14	3	0.063488	0.080608	0.965515	1830	1
Hmbs	3	0.063532	0.080644	0.965515	1831	1
Zbtb12	3	0.063619	0.080726	0.965515	1832	1
Pkia	3	0.063662	0.080769	0.965515	1833	1
AI429214	3	0.063706	0.080801	0.965515	1834	1
Smim11	3	0.063749	0.080839	0.965515	1835	1
Gm11568	3	0.06388	0.080953	0.965515	1836	1
Gm101	3	0.063923	0.08099	0.965515	1837	1
Gjb1	3	0.063967	0.081028	0.965515	1838	1
Smg1	3	0.06401	0.081062	0.965515	1839	1
Emx1	3	0.064054	0.081098	0.965515	1840	1
Kdm3a	3	0.064098	0.081126	0.965515	1841	1
Nrros	3	0.064141	0.081168	0.965515	1842	1
Pp2d1	3	0.064185	0.081203	0.965515	1843	1
Arhgef10	3	0.064228	0.081236	0.965515	1844	1
NonTargetingControlGuideForMouse_0129	1	0.06426	0.081256	0.965515	1845	1
Pcdhb5	3	0.064272	0.081266	0.965515	1846	1
Gin1	3	0.064315	0.081302	0.965515	1847	1
Slc11a2	3	0.064359	0.081347	0.965515	1848	1
Smok3a	1	0.064366	0.081353	0.965515	1849	1
Olfr686	3	0.064489	0.081459	0.965515	1850	1
Coa5	3	0.06462	0.081581	0.965515	1851	1
Ezr	3	0.064663	0.081618	0.965515	1852	1
BC049762	3	0.064707	0.081649	0.965515	1853	1
Olfr16	3	0.06475	0.081686	0.965515	1854	1
Klf11	3	0.064837	0.081765	0.965515	1855	1
Rrnad1	3	0.064881	0.081808	0.965515	1856	1
Qsox2	3	0.064968	0.081878	0.965515	1857	1
Pigr	3	0.065011	0.08192	0.965515	1858	1
Slc5a5	3	0.065055	0.081955	0.965515	1859	1
Nck2	3	0.065098	0.081999	0.965515	1860	1
Olfr811	3	0.065142	0.082038	0.965515	1861	1
Psd	3	0.065185	0.082078	0.965515	1862	1
Lrit3	3	0.065229	0.082114	0.965515	1863	1
mmu-mir-742	4	0.06526	0.082146	0.965515	1864	1
Tceal6	3	0.065272	0.082157	0.965515	1865	1
Olfr437	3	0.065315	0.082191	0.965515	1866	1
Brox	3	0.065402	0.082266	0.965515	1867	1
NonTargetingControlGuideForMouse_0382	1	0.065427	0.082288	0.965515	1868	1
Sdk2	3	0.065446	0.082308	0.965515	1869	1
Dcun1d1	3	0.065489	0.082349	0.965515	1870	1
NonTargetingControlGuideForMouse_0187	1	0.065503	0.082361	0.965515	1871	1
G6pc3	3	0.065533	0.082388	0.965515	1872	1
Adipor2	3	0.065576	0.082413	0.965515	1873	1
Aldh1l2	3	0.06562	0.082455	0.965515	1874	1
Gm648	3	0.065663	0.082492	0.965515	1875	1
Ccdc88a	3	0.065707	0.082524	0.965515	1876	1
NonTargetingControlGuideForMouse_0273	1	0.065761	0.082573	0.965515	1877	1
Chgb	3	0.065837	0.082631	0.965515	1878	1
Ypel5	3	0.065924	0.082708	0.965515	1879	1
Cc2d1a	3	0.066011	0.082785	0.965515	1880	1
Ncald	3	0.066054	0.082823	0.965515	1881	1
Inpp5b	3	0.066185	0.082941	0.965515	1882	1
Slc1a7	3	0.066228	0.082978	0.965515	1883	1
Ercc1	3	0.066272	0.083026	0.965515	1884	1
Galnt3	3	0.066315	0.083071	0.965515	1885	1
Wfdc16	3	0.066359	0.083107	0.965515	1886	1
Stard7	3	0.066402	0.083148	0.965515	1887	1
Tac1	3	0.066446	0.083179	0.965515	1888	1
Ifi204	3	0.066489	0.083213	0.965515	1889	1
Tcstv1	3	0.066532	0.083248	0.965515	1890	1
Gimap3	3	0.066619	0.083324	0.965515	1891	1
Nr0b1	3	0.066663	0.08336	0.965515	1892	1
Il1rl2	3	0.066706	0.083396	0.965515	1893	1
Ror2	3	0.06675	0.083436	0.965515	1894	1
Ngfr	3	0.066793	0.083465	0.965515	1895	1
NonTargetingControlGuideForMouse_0068	1	0.066822	0.083488	0.965515	1896	1
Aes	3	0.066836	0.0835	0.965515	1897	1
Mmp14	3	0.06688	0.083543	0.965515	1898	1
Olfr1390	3	0.066923	0.083588	0.965515	1899	1
Vps26b	3	0.066967	0.083621	0.965515	1900	1
2700029M09Rik	3	0.067054	0.0837	0.965515	1901	1
Abcc1	3	0.06714	0.083773	0.965515	1902	1
1110038F14Rik	3	0.067184	0.083812	0.965515	1903	1
Ermp1	3	0.067227	0.083844	0.965515	1904	1
Vmn2r4	3	0.067292	0.083893	0.965515	1905	1
Fam171a2	3	0.067401	0.083989	0.965515	1906	1
Vmn2r32	2	0.067427	0.08401	0.965515	1907	1
Naca	3	0.067444	0.084028	0.965515	1908	1
Sppl3	3	0.067531	0.084093	0.965515	1909	1
Bnip1	3	0.067618	0.084164	0.965515	1910	1
Cog7	3	0.067661	0.0842	0.965515	1911	1
Slit3	3	0.067748	0.084277	0.965515	1912	1
Purb	3	0.067835	0.084359	0.965515	1913	1
Arl6	3	0.067922	0.084434	0.965515	1914	1
Cep72	3	0.067965	0.084469	0.965515	1915	1
Zbtb41	3	0.068009	0.084506	0.965515	1916	1
Pank2	3	0.068052	0.084548	0.965515	1917	1
Plxnb3	3	0.068095	0.084577	0.965515	1918	1
Syne1	3	0.068139	0.084613	0.965515	1919	1
1700006A11Rik	3	0.068182	0.084656	0.965515	1920	1
Nadsyn1	3	0.068226	0.084692	0.965515	1921	1
Pcdhga9	1	0.068232	0.0847	0.965515	1922	1
Fhl4	3	0.068269	0.084732	0.965515	1923	1
Gpr141	3	0.068312	0.084767	0.965515	1924	1
NonTargetingControlGuideForMouse_0354	1	0.068353	0.084803	0.965515	1925	1
Mroh9	3	0.068356	0.084807	0.965515	1926	1
Zfp831	3	0.068443	0.084878	0.965515	1927	1
Plekhf2	3	0.068486	0.08491	0.965515	1928	1
Fpr-rs3	3	0.068529	0.084959	0.965515	1929	1
Sympk	3	0.068573	0.084995	0.965515	1930	1
Neurod2	3	0.068616	0.085028	0.965515	1931	1
Msh5	3	0.068659	0.085071	0.965515	1932	1
Abca14	3	0.068703	0.085103	0.965515	1933	1
Mcm3	3	0.06879	0.085176	0.965515	1934	1
Btbd6	3	0.068833	0.085209	0.965515	1935	1
Nudcd3	3	0.068876	0.085243	0.965515	1936	1
Sprn	3	0.068963	0.085305	0.965515	1937	1
Map1lc3b	3	0.06905	0.085387	0.965515	1938	1
Olfr507	3	0.069093	0.085431	0.965515	1939	1
Smg9	3	0.06918	0.085506	0.965515	1940	1
4933406J08Rik	3	0.069223	0.085542	0.965515	1941	1
Pcdh20	3	0.069267	0.085573	0.965515	1942	1
Ell3	3	0.06931	0.085616	0.965515	1943	1
Sh3glb1	3	0.069353	0.085657	0.965515	1944	1
Vmn1r206	3	0.069397	0.085698	0.965515	1945	1
Adh4	3	0.06944	0.085734	0.965515	1946	1
mmu-mir-6239	4	0.069461	0.085751	0.965515	1947	1
Slco1c1	3	0.069527	0.085802	0.965515	1948	1
Stk17b	3	0.06957	0.085833	0.965515	1949	1
Amer1	3	0.0697	0.085934	0.965515	1950	1
Chrna5	3	0.069743	0.085969	0.965515	1951	1
4933425L06Rik	3	0.069787	0.086008	0.965515	1952	1
Fbxw10	3	0.06983	0.086044	0.965515	1953	1
Il4	3	0.069873	0.086081	0.965515	1954	1
Wdr27	3	0.06996	0.086153	0.965515	1955	1
Cxcr2	3	0.070003	0.086187	0.965515	1956	1
NonTargetingControlGuideForMouse_0893	1	0.070021	0.086204	0.965515	1957	1
Prss38	3	0.070047	0.086223	0.965515	1958	1
Papd4	3	0.07009	0.086259	0.965515	1959	1
Gas7	3	0.070133	0.086302	0.965515	1960	1
Tecrl	3	0.070177	0.086332	0.965515	1961	1
Gsdmd	3	0.07022	0.086364	0.965515	1962	1
Lce1d	3	0.070263	0.086389	0.965515	1963	1
Xpo1	3	0.070307	0.086424	0.965515	1964	1
Lztfl1	3	0.07035	0.086461	0.965515	1965	1
Strn4	3	0.070393	0.086501	0.965515	1966	1
Usp17lc	3	0.070437	0.08654	0.965515	1967	1
Rmnd5b	3	0.07048	0.086576	0.965515	1968	1
Dhdh	3	0.070567	0.086643	0.965515	1969	1
Cypt3	3	0.07061	0.086684	0.965515	1970	1
NonTargetingControlGuideForMouse_0062	1	0.070627	0.086697	0.965515	1971	1
Pitpnm3	3	0.070653	0.086715	0.965515	1972	1
Pth2	3	0.070697	0.086751	0.965515	1973	1
Trappc2	3	0.07074	0.086789	0.965515	1974	1
Gtf2ird1	3	0.070827	0.086853	0.965515	1975	1
Zfp14	3	0.07087	0.086884	0.965515	1976	1
Capn2	3	0.070913	0.086915	0.965515	1977	1
Ngef	3	0.071043	0.087024	0.965515	1978	1
Defb14	3	0.071086	0.08707	0.965515	1979	1
Ets2	3	0.07113	0.087105	0.965515	1980	1
Pdcl2	3	0.071173	0.087138	0.965515	1981	1
Kcnk15	3	0.071216	0.087172	0.965515	1982	1
Ppme1	3	0.07126	0.087207	0.965515	1983	1
Xpc	3	0.07139	0.087316	0.965515	1984	1
Fxr1	3	0.071433	0.08736	0.965515	1985	1
Adam2	3	0.071476	0.087399	0.965515	1986	1
NonTargetingControlGuideForMouse_0924	1	0.071476	0.087399	0.965515	1987	1
Rnf208	3	0.071519	0.087439	0.965515	1988	1
Krtap3-1	3	0.071563	0.087482	0.965515	1989	1
Fam126b	3	0.071606	0.087527	0.965515	1990	1
Cldn5	3	0.071649	0.087561	0.965515	1991	1
Drosha	3	0.071693	0.087594	0.965515	1992	1
Atad5	3	0.071736	0.087629	0.965515	1993	1
Phf11a	3	0.071779	0.087663	0.965515	1994	1
Trpm4	3	0.071822	0.087709	0.965515	1995	1
Olfr168	3	0.071866	0.087745	0.965515	1996	1
Isoc2b	3	0.071909	0.087781	0.965515	1997	1
Mrpl43	3	0.071952	0.087811	0.965515	1998	1
Cisd2	3	0.072039	0.087882	0.965515	1999	1
[truncated: 20,546 more rows]

## Sheet: Library_B
id	sgrna num	pos|score	pos|p-value	pos|fdr	pos|rank	pos|goodsgrna
Mxra8	3	1.8832e-09	2.3231e-07	0.00495	1	3
Psenen	3	2.7978e-06	7.2016e-06	0.076733	2	3
Zfp36l1	3	6.7126e-06	2.0211e-05	0.143564	3	3
Phip	3	2.4534e-05	6.4349e-05	0.342822	4	2
Numb	3	6.5339e-05	0.00018469	0.574807	5	3
Ppp1r3g	3	7.3601e-05	0.00021303	0.574807	6	3
Psen1	3	7.838e-05	0.00022557	0.574807	7	3
4930467E23Rik	3	7.8831e-05	0.00022743	0.574807	8	3
Tmem18	3	8.3803e-05	0.00024276	0.574807	9	3
Nf2	3	0.00010199	0.00030363	0.64703	10	3
Tmco2	3	0.00012267	0.00036682	0.710621	11	1
Traf3	3	0.00015933	0.00045788	0.743502	12	3
Olfr645	3	0.00017173	0.00049319	0.743502	13	1
Gm11563	3	0.00018586	0.00053779	0.743502	14	3
Pomc	3	0.00019157	0.00054755	0.743502	15	3
Rnf32	3	0.00019551	0.00055824	0.743502	16	3
Sptlc1	3	0.00022079	0.00062932	0.757426	17	1
Smg6	3	0.00026598	0.00075152	0.757426	18	3
Rps6ka6	3	0.00026977	0.00076081	0.757426	19	3
Efna2	3	0.00026985	0.00076128	0.757426	20	1
Tmem132d	3	0.00027524	0.00077521	0.757426	21	2
Klf3	3	0.00028949	0.00081192	0.757426	22	3
Cnot10	3	0.00029327	0.00081749	0.757426	23	3
Tmem164	3	0.00031891	0.000883	0.784035	24	2
Zfp87	3	0.00033514	0.00092621	0.788462	25	3
Prrc2a	3	0.00034535	0.00096199	0.788462	26	3
Xrcc5	3	0.00036797	0.0010247	0.808764	27	1
Smg7	3	0.00038989	0.0010879	0.82797	28	3
Vps41	3	0.00041702	0.0011548	0.84505	29	2
Mrps26	3	0.00042716	0.0011897	0.84505	30	3
Hexim1	3	0.00046153	0.0012747	0.857209	31	2
Ctdsp2	3	0.00046608	0.0012872	0.857209	32	3
Aco1	3	0.00049381	0.0013653	0.860974	33	3
Cables1	3	0.00050338	0.0013871	0.860974	34	3
Rptor	3	0.00051513	0.001415	0.860974	35	1
Zfp936	3	0.00052831	0.0014545	0.860974	36	3
Rp9	3	0.00055936	0.0015409	0.869072	37	3
Rint1	3	0.00056418	0.0015497	0.869072	38	2
Adcy6	3	0.00061012	0.0016654	0.884158	39	3
N4bp1	3	0.00063771	0.0017402	0.884158	40	3
Phtf1	3	0.00064684	0.0017693	0.884158	41	3
Zmynd8	3	0.00066162	0.0018132	0.884158	42	2
Ppp1r10	3	0.00066228	0.0018155	0.884158	43	1
Mmrn2	3	0.00071132	0.0019442	0.884158	44	1
Swi5	3	0.0007556	0.0020645	0.884158	45	2
Kcnk1	3	0.00076003	0.002072	0.884158	46	3
Nfyc	3	0.00076037	0.0020729	0.884158	47	2
1700113H08Rik	3	0.00078231	0.0021235	0.884158	48	3
Galnt2	3	0.00078398	0.0021286	0.884158	49	3
Xpo6	3	0.00078565	0.0021347	0.884158	50	3
Elp6	3	0.00080941	0.0022025	0.884158	51	3
Ppdpf	3	0.00081368	0.0022141	0.884158	52	2
Aqp4	3	0.00085574	0.0023321	0.884158	53	3
Gm9047	3	0.00085845	0.0023377	0.884158	54	2
Olfr45	3	0.00086727	0.0023614	0.884158	55	2
Ankrd42	3	0.00090027	0.0024543	0.884158	56	3
Lsm6	3	0.00090749	0.0024673	0.884158	57	2
Frem1	3	0.00091499	0.0024892	0.884158	58	3
Sf3b4	3	0.00094134	0.0025621	0.884158	59	3
Tob1	3	0.00095653	0.0026049	0.884158	60	3
Aym1	3	0.00099181	0.0026922	0.884158	61	2
Braf	3	0.0010042	0.0027282	0.884158	62	2
1110008J03Rik	3	0.0010047	0.0027308	0.884158	63	3
Rfx4	3	0.0010056	0.0027329	0.884158	64	2
Slc44a1	3	0.0010546	0.0028562	0.884158	65	1
Dhcr7	3	0.0010581	0.0028665	0.884158	66	3
Olfr517	3	0.0010892	0.002944	0.884158	67	3
Vmn1r16	3	0.0011036	0.0029877	0.884158	68	2
Olfr1341	3	0.0011527	0.0031141	0.884158	69	3
Map3k14	3	0.0011567	0.0031243	0.884158	70	2
Emc9	3	0.0011796	0.003181	0.884158	71	2
Hoxd12	3	0.0012017	0.0032456	0.884158	72	3
Inadl	3	0.001217	0.0032893	0.884158	73	3
1190005I06Rik	3	0.0012175	0.0032907	0.884158	74	3
Ccdc27	3	0.0012183	0.003292	0.884158	75	2
Atp10d	3	0.0012483	0.0033743	0.884158	76	3
Tead3	3	0.0012507	0.0033789	0.884158	77	2
Grem1	3	0.0012674	0.0034198	0.884158	78	3
Olfr49	3	0.0012929	0.003483	0.884158	79	3
Zfp560	3	0.0012998	0.0034969	0.884158	80	1
C1galt1c1	3	0.0013246	0.0035662	0.884158	81	3
Pygm	3	0.0013361	0.0035973	0.884158	82	2
Cyp3a57	3	0.0013381	0.0036024	0.884158	83	2
Ube2m	3	0.0013484	0.0036252	0.884158	84	3
2010001E11Rik	3	0.0013488	0.0036256	0.884158	85	2
Ttc25	3	0.0013544	0.0036414	0.884158	86	3
1810009A15Rik	3	0.0013951	0.0037502	0.884158	87	3
Papd4	3	0.0013978	0.0037599	0.884158	88	2
Hnrnpr	3	0.0014064	0.0037813	0.884158	89	2
Slitrk6	3	0.0014086	0.0037841	0.884158	90	3
Scp2d1	3	0.0014241	0.0038259	0.884158	91	3
Olfr716	3	0.0014468	0.0038919	0.884158	92	2
Tat	3	0.0014486	0.0038937	0.884158	93	2
Olfr1257	3	0.0014635	0.0039193	0.884158	94	3
Klk1b3	3	0.0014711	0.0039416	0.884158	95	3
Pde6a	3	0.0014958	0.0040076	0.889594	96	2
Cd99l2	3	0.0015449	0.0041493	0.909772	97	3
Rps19bp1	3	0.0015939	0.0042682	0.909772	98	1
Bag6	3	0.0016004	0.0042896	0.909772	99	3
Qrfpr	3	0.0016179	0.0043314	0.909772	100	3
4931408C20Rik	3	0.0016429	0.0044039	0.909772	101	1
Sntb1	3	0.0016505	0.0044252	0.909772	102	2
Nono	3	0.0016616	0.0044536	0.909772	103	3
Fam69a	3	0.0017005	0.0045526	0.909772	104	3
Slc26a3	3	0.0017377	0.0046548	0.909772	105	3
Kcnrg	3	0.0017563	0.0047096	0.909772	106	3
Olfr463	3	0.0017899	0.0047988	0.909772	107	3
Zp3	3	0.0018105	0.0048448	0.909772	108	2
Pex13	3	0.0018265	0.0048927	0.909772	109	3
Dus3l	3	0.0018375	0.0049229	0.909772	110	3
Tanc1	3	0.0018389	0.004927	0.909772	111	2
Fryl	3	0.0018438	0.0049419	0.909772	112	3
Edn1	3	0.001875	0.0050172	0.909772	113	2
Smyd3	3	0.0018879	0.0050483	0.909772	114	2
Gcsh	3	0.0018968	0.0050748	0.909772	115	3
Rasa2	3	0.0019065	0.0050999	0.909772	116	3
Pygl	3	0.001937	0.005177	0.909772	117	1
Iffo1	3	0.001953	0.0052211	0.909772	118	2
Eif3j1	2	0.0019781	0.005288	0.909772	119	2
Kdm1b	3	0.0019802	0.0052922	0.909772	120	3
A330021E22Rik	3	0.001986	0.0053094	0.909772	121	2
Bet1	3	0.0019876	0.0053145	0.909772	122	2
Kcnk15	3	0.0020097	0.0053698	0.909772	123	3
Rala	3	0.00203	0.0054195	0.909772	124	2
Prob1	3	0.002035	0.0054297	0.909772	125	2
Traf2	3	0.0020501	0.0054655	0.909772	126	2
Dhx16	3	0.0020627	0.0055046	0.909772	127	3
Ttc30a1	3	0.0020673	0.0055166	0.909772	128	3
Amigo3	3	0.002084	0.0055663	0.909772	129	1
Foxh1	3	0.0020957	0.0055993	0.909772	130	2
Dcakd	3	0.0021317	0.0057025	0.909772	131	3
R3hcc1	3	0.002133	0.0057053	0.909772	132	1
Fam49a	3	0.0021341	0.0057099	0.909772	133	2
Gm16367	3	0.0021418	0.0057304	0.909772	134	2
Olfr906	3	0.002182	0.0058316	0.909772	135	2
Rab27b	3	0.0022157	0.0059199	0.909772	136	3
Zfp456	3	0.002231	0.0059617	0.909772	137	2
Slc39a2	3	0.0022434	0.0059924	0.909772	138	2
Ppara	3	0.0022788	0.0060732	0.909772	139	3
Rftn1	3	0.00228	0.0060774	0.909772	140	2
Serpinb9c	3	0.0022871	0.0060983	0.909772	141	2
Muc19	3	0.0022933	0.0061127	0.909772	142	3
Fam63a	3	0.0022984	0.0061295	0.909772	143	3
1700017D01Rik	3	0.0023087	0.0061546	0.909772	144	3
Eaf2	3	0.0023289	0.0062089	0.909772	145	2
Capn11	3	0.0023392	0.0062331	0.909772	146	3
Zfp532	3	0.0023779	0.0063292	0.917525	147	1
Atad1	3	0.002426	0.0064503	0.921602	148	2
Gm5416	3	0.0024269	0.0064524	0.921602	149	3
Lrrn1	3	0.0024691	0.0065653	0.921602	150	3
Tmem173	3	0.0024759	0.0065848	0.921602	151	2
Lipe	3	0.0024977	0.006654	0.921602	152	2
D1Pas1	3	0.0025249	0.0067186	0.921602	153	3
Nox4	3	0.0025423	0.0067567	0.921602	154	2
Zp3r	3	0.0025506	0.0067734	0.921602	155	3
Sntn	3	0.0025676	0.0068236	0.921602	156	2
Pnldc1	3	0.0025739	0.0068454	0.921602	157	2
Atm	3	0.0025884	0.0068821	0.921602	158	3
Nkain4	3	0.0026144	0.0069514	0.921602	159	3
Apold1	3	0.0026229	0.0069709	0.921602	160	2
Kirrel	3	0.002634	0.0070029	0.921602	161	3
Iqub	3	0.0026498	0.007048	0.921602	162	2
Lurap1	3	0.0026641	0.0070898	0.921602	163	2
Pbld2	3	0.0026719	0.0071126	0.921602	164	2
Reg1	3	0.002682	0.0071358	0.921602	165	3
Sycp1	3	0.0027182	0.007232	0.923964	166	3
Dtnb	3	0.0027208	0.0072408	0.923964	167	1
Vmn1r72	3	0.0028021	0.0074615	0.92696	168	3
Ptchd4	3	0.0028188	0.0075043	0.92696	169	1
Armc10	3	0.0028299	0.0075312	0.92696	170	2
Tssk2	3	0.0028551	0.0075953	0.92696	171	3
Trib3	3	0.0028595	0.0076046	0.92696	172	2
Nr5a1	3	0.0028678	0.0076279	0.92696	173	1
Pigc	3	0.0028773	0.0076529	0.92696	174	2
Grap2	3	0.0028892	0.0076813	0.92696	175	2
Olfr800	3	0.0029128	0.0077431	0.92696	176	3
Fbxl6	3	0.0029167	0.0077538	0.92696	177	2
Hao2	3	0.0029248	0.0077714	0.92696	178	3
Nek7	3	0.0029349	0.007796	0.92696	179	3
Rdh1	3	0.002949	0.0078393	0.92696	180	3
Prdm4	3	0.0029824	0.0079289	0.92696	181	3
Tor1b	3	0.002999	0.0079707	0.92696	182	2
Olfr568	3	0.0030147	0.0080149	0.92696	183	2
C1ql1	3	0.0030284	0.0080493	0.92696	184	3
Tceanc	3	0.0030531	0.0081036	0.92696	185	3
Phldb1	3	0.0030555	0.0081129	0.92696	186	3
Mb21d2	3	0.0030636	0.0081343	0.92696	187	2
Ptpn13	3	0.0031126	0.0082676	0.937145	188	2
Ldlrad2	3	0.0031616	0.0083954	0.946592	189	2
Atg16l1	3	0.0031808	0.008446	0.94729	190	3
2810474O19Rik	3	0.0032595	0.0086551	0.953079	191	1
Mib1	3	0.0032736	0.0086821	0.953079	192	3
Cand1	3	0.0032831	0.0087081	0.953079	193	2
Atp5g1	3	0.0032996	0.0087504	0.953079	194	3
Hmgb1	3	0.0033085	0.0087768	0.953079	195	2
Arhgap44	3	0.0033245	0.0088168	0.953079	196	2
Cpne8	3	0.0033574	0.0088949	0.953079	197	1
Suv39h2	3	0.0033919	0.0089785	0.953079	198	2
Dtl	3	0.0034064	0.0090143	0.953079	200	2
Tcl1b5	3	0.0034064	0.0090143	0.953079	199	3
Flad1	3	0.0034134	0.0090296	0.953079	201	3
Gm5741	3	0.0034491	0.0091295	0.953079	202	3
Defb30	3	0.0034553	0.0091397	0.953079	203	2
Trp53	3	0.0034603	0.0091495	0.953079	204	3
Serpinb3a	3	0.0034664	0.0091685	0.953079	205	2
Dntt	3	0.0035043	0.0092721	0.955876	206	2
Cyb561d2	3	0.00351	0.0092851	0.955876	207	3
Uxs1	2	0.0035461	0.0093767	0.955953	208	1
Olfr1513	3	0.0035533	0.0093901	0.955953	209	2
Psmb4	3	0.0036022	0.009503	0.955953	210	1
Fam13a	3	0.0036483	0.0096164	0.955953	211	3
Vax2	3	0.0036512	0.0096271	0.955953	212	2
Olfr640	3	0.0036815	0.0096996	0.955953	213	3
Rpl22	3	0.0036848	0.0097079	0.955953	214	3
Epc1	3	0.0037151	0.009779	0.955953	215	3
Tenm3	3	0.0037156	0.00978	0.955953	216	3
Txlnb	3	0.003749	0.0098752	0.955953	217	2
Gpr19	3	0.0037862	0.009983	0.955953	218	2
Slco4a1	3	0.0038469	0.010142	0.955953	219	1
Id2	3	0.003882	0.01023	0.955953	220	2
Rras2	3	0.0038889	0.010247	0.955953	221	2
Rasa1	3	0.0038958	0.010264	0.955953	222	3
Zfp747	3	0.0038959	0.010264	0.955953	223	2
Fam71e1	3	0.0039252	0.010326	0.955953	224	2
Olfr1240	3	0.0039448	0.010387	0.955953	225	1
Olfr1181	3	0.0039486	0.010395	0.955953	226	3
Hspb7	3	0.0039536	0.010407	0.955953	227	3
Tmem168	3	0.0039651	0.01044	0.955953	228	2
Il15ra	3	0.0039938	0.010519	0.955953	229	1
Wrap73	3	0.0039942	0.01052	0.955953	230	3
Jrk	3	0.0039991	0.010533	0.955953	231	3
Vmn2r10	3	0.004	0.010536	0.955953	232	2
Gm16381	3	0.004028	0.010606	0.955953	233	2
Fchsd2	3	0.0040427	0.01065	0.955953	234	3
Ago4	3	0.0040596	0.010698	0.955953	235	3
Olfr934	3	0.0041051	0.010797	0.955953	236	3
BC021785	3	0.0041125	0.010813	0.955953	237	2
Clec4e	3	0.0041253	0.01084	0.955953	238	3
Unkl	3	0.0041406	0.010878	0.955953	239	3
Nt5e	3	0.0041417	0.010881	0.955953	240	3
Ambra1	3	0.0041623	0.010934	0.955953	241	2
Glt8d2	3	0.0041658	0.010943	0.955953	242	3
Fabp4	3	0.0041773	0.010969	0.955953	243	3
Smr3a	3	0.0041895	0.011001	0.955953	244	2
Ankmy2	3	0.0042028	0.011026	0.955953	245	3
Dbx2	3	0.0042384	0.011119	0.955953	246	2
Slc26a6	3	0.0042626	0.011188	0.955953	247	2
Krt6a	2	0.0042644	0.011192	0.955953	248	2
Chst11	3	0.0042874	0.011246	0.955953	249	2
Adnp	3	0.0042993	0.011276	0.955953	250	3
Gpr56	3	0.0043096	0.011299	0.955953	251	2
Stoml1	3	0.0043363	0.011372	0.955953	252	1
H13	3	0.0043541	0.011421	0.955953	253	3
Map3k2	3	0.004358	0.011429	0.955953	254	3
Gba	3	0.004397	0.01153	0.955953	255	3
Pou2f3	3	0.0044132	0.011579	0.955953	256	3
Snap25	3	0.0044341	0.01163	0.955953	257	3
Nudt8	3	0.0044667	0.011711	0.955953	258	2
Vps33b	3	0.0044741	0.011727	0.955953	259	2
B3gnt2	3	0.0044926	0.011779	0.955953	260	3
Frmd4b	3	0.0045167	0.011849	0.955953	261	3
Pou5f2	3	0.004532	0.011891	0.955953	262	2
Magea3	3	0.0045371	0.011905	0.955953	263	2
Amotl2	3	0.0045398	0.011912	0.955953	264	3
Fam92a	3	0.0045408	0.011916	0.955953	265	2
Ccdc101	3	0.0045701	0.011994	0.955953	266	3
Ugt2b38	3	0.0045809	0.012025	0.955953	267	2
Ccdc92	3	0.004602	0.012075	0.955953	268	3
Csgalnact1	3	0.0046787	0.012255	0.955953	269	3
Sox9	3	0.0047018	0.012308	0.955953	270	3
Olfr56	3	0.0047276	0.01237	0.955953	271	1
Rhoc	3	0.0047766	0.012494	0.955953	272	1
Arfgef2	3	0.0047898	0.012529	0.955953	273	3
Senp8	3	0.00481	0.01258	0.955953	274	3
l7Rn6	3	0.0048255	0.012629	0.955953	275	2
Nme8	3	0.0049233	0.012876	0.955953	276	3
Adam12	3	0.0049314	0.012898	0.955953	277	2
Amotl1	3	0.0049869	0.013034	0.955953	278	3
Olfr146	3	0.0050056	0.013085	0.955953	279	3
Gpc4	3	0.0050211	0.013124	0.955953	280	2
Gpm6a	3	0.005056	0.01321	0.955953	281	2
Sox4	3	0.0050599	0.013224	0.955953	282	3
Mxd3	3	0.00507	0.013248	0.955953	283	1
2210013O21Rik	3	0.0050835	0.013281	0.955953	284	3
Pdcd10	3	0.005085	0.013284	0.955953	285	3
Chd8	3	0.0051189	0.013369	0.955953	286	2
Rxfp2	3	0.0051608	0.013483	0.955953	287	3
Rtca	3	0.0051622	0.013489	0.955953	288	2
Tmsb10	3	0.0051678	0.013503	0.955953	289	1
Sprr1a	3	0.0051916	0.013568	0.955953	290	3
Klra7	3	0.0052167	0.013627	0.955953	291	1
Fto	3	0.0052255	0.013652	0.955953	292	3
Ncapd2	3	0.0052337	0.013673	0.955953	293	2
Eif3h	3	0.0052377	0.013686	0.955953	294	2
Gjb5	3	0.0052544	0.013733	0.955953	296	3
Dgkh	3	0.0052544	0.013733	0.955953	295	3
Srek1	3	0.0052656	0.01376	0.955953	297	3
Dspp	3	0.00527	0.013774	0.955953	298	3
Ei24	3	0.0052953	0.013841	0.955953	299	3
Olfr638	3	0.0053102	0.013878	0.955953	300	3
Abhd5	3	0.0053634	0.014023	0.955953	301	1
Foxb1	3	0.0053988	0.01411	0.955953	302	3
Mdga1	3	0.0054109	0.014139	0.955953	303	3
Rxrb	3	0.0054123	0.014142	0.955953	304	1
Fbxo32	3	0.0054285	0.014183	0.955953	305	2
Akap6	3	0.0054346	0.014195	0.955953	306	2
Pus3	3	0.0054387	0.014209	0.955953	307	2
Tm7sf3	3	0.0054427	0.014224	0.955953	308	3
Mllt3	3	0.0054612	0.014277	0.955953	309	2
Cenpk	3	0.00548	0.014325	0.955953	310	3
Olfr980	3	0.0054834	0.014336	0.955953	311	2
Rfpl3s	3	0.0055106	0.014412	0.955953	312	3
Rbm5	3	0.0055505	0.014504	0.955953	313	3
Fam105a	3	0.0055528	0.014507	0.955953	314	3
Gng11	3	0.0055589	0.014523	0.955953	315	1
Agk	3	0.0055816	0.014583	0.955953	316	2
Acta1	3	0.0055821	0.014585	0.955953	317	3
Romo1	3	0.0056078	0.01466	0.955953	318	1
Ndufb7	3	0.0056104	0.014668	0.955953	319	2
Msl1	3	0.0056386	0.014732	0.955953	320	3
Gpr141	3	0.0056861	0.014849	0.955953	321	3
Ergic2	3	0.0057056	0.014902	0.955953	322	2
Awat1	3	0.0057471	0.014995	0.955953	323	2
Rhebl1	3	0.0057512	0.015005	0.955953	324	2
Ptprs	3	0.0057545	0.015015	0.955953	325	1
Scyl2	3	0.0057599	0.015028	0.955953	326	3
Vmn1r43	3	0.0057741	0.015062	0.955953	327	3
Itgb5	3	0.0057804	0.015079	0.955953	328	2
Dennd1c	3	0.0058034	0.015141	0.955953	329	2
Ubr7	3	0.0058181	0.015181	0.955953	330	2
Mill2	3	0.0058391	0.015236	0.955953	331	3
Sult1a1	3	0.0058517	0.015273	0.955953	332	3
Krt73	3	0.0058522	0.015274	0.955953	333	2
Kank4	3	0.0058559	0.015284	0.955953	334	3
Tacr3	3	0.0058566	0.015285	0.955953	335	3
Gm44	3	0.0058646	0.015304	0.955953	336	3
Grhpr	3	0.005871	0.015322	0.955953	337	3
Prpsap1	3	0.0059011	0.015397	0.955953	338	1
Gif	3	0.0059126	0.015428	0.955953	339	3
Hgf	3	0.0059149	0.015433	0.955953	340	2
Yes1	3	0.005919	0.015447	0.955953	341	3
Pten	3	0.0059287	0.015466	0.955953	342	3
Anapc2	3	0.00595	0.015525	0.955953	343	1
Olfr1474	3	0.005953	0.015539	0.955953	344	2
Birc2	3	0.005956	0.015547	0.955953	345	3
Zscan22	3	0.0059869	0.015631	0.955953	346	2
Tmcc1	3	0.0059916	0.015645	0.955953	347	3
1700018C11Rik	3	0.0059989	0.015658	0.955953	348	1
Acsm5	3	0.006024	0.015722	0.955953	349	3
Piezo1	3	0.006038	0.015747	0.955953	350	3
Cdr2l	3	0.0060477	0.015776	0.955953	351	1
Cldn18	3	0.0060901	0.015889	0.955953	352	3
Ppp1r3a	3	0.0061007	0.015915	0.955953	353	3
Lrmp	3	0.0061343	0.016003	0.955953	354	3
Tm6sf2	3	0.0061455	0.01603	0.955953	355	2
Eomes	3	0.0061753	0.016096	0.955953	356	2
Ptprj	3	0.0061943	0.016148	0.955953	357	1
Rimkla	3	0.0061954	0.016153	0.955953	358	3
Mesp1	3	0.0062142	0.016196	0.955953	359	2
Ddx49	3	0.0062432	0.016269	0.955953	360	1
Sipa1l2	3	0.0062445	0.016274	0.955953	361	2
Mapk6	3	0.0062502	0.016296	0.955953	362	3
Rrp36	3	0.0062921	0.016405	0.955953	363	1
Ube2z	3	0.0063409	0.016526	0.955953	364	2
Ugt2a3	3	0.0064236	0.016737	0.955953	365	2
Mn1	3	0.0064386	0.016778	0.955953	366	1
Nrbp1	3	0.0064461	0.016798	0.955953	367	3
Src	3	0.0064563	0.016824	0.955953	368	3
Kpna1	3	0.0064875	0.016897	0.955953	369	2
Slc4a3	3	0.0064897	0.016902	0.955953	370	2
3110052M02Rik	3	0.0065246	0.016991	0.955953	371	3
Olfr649	3	0.0065364	0.017027	0.955953	372	2
Gm16404	3	0.0065401	0.017035	0.955953	373	3
Rnf31	3	0.0065658	0.017092	0.955953	374	3
Mef2b	3	0.0065852	0.017146	0.955953	375	2
Gm5595	2	0.0066133	0.017211	0.955953	376	1
Hao1	3	0.0066274	0.017247	0.955953	377	3
Cd209a	3	0.0066341	0.017263	0.955953	378	1
Cxcr4	3	0.0066363	0.017267	0.955953	379	2
Ccdc129	3	0.0066453	0.017289	0.955953	380	2
NonTargetingControlGuideForMouse_0258	1	0.0066488	0.017299	0.955953	381	1
Vmn1r57	3	0.0066557	0.017314	0.955953	382	3
Gpr146	3	0.0066676	0.017345	0.955953	383	2
Atp4b	3	0.0066801	0.017381	0.955953	384	3
Pdzd7	3	0.0066829	0.017389	0.955953	385	1
Wfdc13	3	0.0066888	0.017404	0.955953	386	3
Cfl2	3	0.0067318	0.017518	0.955953	387	2
Slc31a1	3	0.0067665	0.017599	0.955953	388	2
Mat1a	3	0.0067806	0.017644	0.955953	389	2
Trim17	3	0.0068026	0.017709	0.955953	390	3
Nfkb1	3	0.0068295	0.017775	0.955953	391	3
Akr1c13	3	0.0068379	0.017788	0.955953	392	3
Gm14744	2	0.0068415	0.017796	0.955953	393	1
Rbm28	3	0.0068783	0.017903	0.955953	394	1
Kctd16	3	0.0068858	0.017927	0.955953	395	3
Cda	3	0.0069115	0.017992	0.955953	396	2
Krt14	3	0.0069271	0.018034	0.955953	397	2
Mup6	3	0.0069297	0.018041	0.955953	398	2
Safb	3	0.006976	0.018164	0.955953	399	1
Bdnf	3	0.006992	0.018201	0.955953	400	3
Atp2a3	3	0.0070248	0.018282	0.955953	401	1
Wee2	3	0.0070695	0.01841	0.955953	402	2
Grin2c	3	0.0070737	0.018422	0.955953	403	1
NonTargetingControlGuideForMouse_0328	1	0.0071068	0.018499	0.955953	404	1
Tsc22d2	3	0.0071225	0.018541	0.955953	405	2
Slc27a2	3	0.0071318	0.018566	0.955953	406	2
Ndufa13	3	0.0071465	0.018607	0.955953	407	3
Gm5409	3	0.0071596	0.018646	0.955953	408	3
Klf6	3	0.0071684	0.018676	0.955953	409	3
Il3ra	3	0.0071713	0.018683	0.955953	410	2
Arl2bp	3	0.0071894	0.018736	0.955953	411	3
Gm5150	3	0.0071894	0.018736	0.955953	412	3
Olfr346	3	0.0072202	0.018805	0.955953	413	2
Cidec	3	0.0072232	0.018814	0.955953	414	3
Sla2	3	0.0072479	0.018879	0.955953	415	3
Jak1	3	0.007269	0.018917	0.955953	416	1
Grxcr1	3	0.0072712	0.018926	0.955953	417	2
Snhg11	3	0.0072946	0.018987	0.955953	418	2
Enpp7	3	0.0073338	0.019088	0.955953	419	3
Nim1	3	0.0073422	0.019109	0.955953	420	3
Olfr860	3	0.0073666	0.019167	0.955953	421	1
C86695	3	0.0073884	0.019216	0.955953	422	2
Olfr1141	3	0.0074007	0.019247	0.955953	423	3
Gigyf2	3	0.0074155	0.019296	0.955953	424	1
Rmdn1	3	0.0074166	0.019299	0.955953	425	2
Olfr1033	3	0.0074355	0.019349	0.955953	426	2
Sema6d	3	0.0074643	0.01942	0.955953	427	3
Prss51	3	0.0075131	0.019533	0.955953	428	1
B3gnt5	3	0.0075281	0.019576	0.955953	429	3
Prickle2	3	0.0075619	0.019669	0.955953	430	2
1700018B08Rik	3	0.0075634	0.019672	0.955953	431	2
Nlrp12	3	0.0076108	0.019776	0.955953	432	2
Klhl28	3	0.0076206	0.019801	0.955953	433	2
Arntl2	3	0.0076361	0.019839	0.955953	434	3
Olfr1262	3	0.0076636	0.019906	0.955953	435	3
S100a6	3	0.007678	0.019942	0.955953	436	3
Inpp5a	3	0.0077084	0.020029	0.955953	437	1
Olfr510	3	0.0077116	0.020038	0.955953	438	2
Bicc1	3	0.0077452	0.020121	0.955953	439	3
Abcf1	3	0.0077572	0.020147	0.955953	440	1
Haus1	3	0.007806	0.020265	0.955953	441	1
Akr1e1	3	0.0078125	0.020285	0.955953	443	3
Gpc2	3	0.0078125	0.020285	0.955953	442	3
Dusp15	3	0.0078289	0.020327	0.955953	444	3
Ip6k3	3	0.0078548	0.020393	0.955953	445	2
Cndp1	3	0.0079037	0.020516	0.955953	446	1
Ndufaf2	3	0.0079525	0.020635	0.955953	447	2
Eif4e2	3	0.0079544	0.020642	0.955953	448	3
NonTargetingControlGuideForMouse_0203	1	0.0079736	0.020695	0.955953	449	1
Ifngr1	3	0.0079739	0.020695	0.955953	450	3
Uros	3	0.0080013	0.020753	0.955953	451	2
Syngr4	3	0.0080328	0.020821	0.955953	452	3
Dynll2	3	0.0080624	0.020897	0.955953	453	3
Hid1	3	0.0080709	0.020915	0.955953	454	2
Cdk5r2	3	0.0080989	0.020977	0.955953	455	1
Iqsec3	3	0.0081004	0.020981	0.955953	456	2
Olfr954	3	0.0081348	0.021071	0.955953	457	2
Gpc1	3	0.0081477	0.021105	0.955953	458	2
Cyp2e1	3	0.0081575	0.021125	0.955953	459	3
Rsbn1	3	0.0081965	0.021218	0.955953	460	2
Arhgap33	3	0.0082053	0.02124	0.955953	461	3
Skap1	3	0.0082138	0.02126	0.955953	462	3
Fam115c	3	0.0082392	0.021317	0.955953	463	3
Pigr	3	0.0082453	0.021325	0.955953	464	3
Nfkb2	3	0.0082834	0.021418	0.955953	465	3
Vmn1r121	1	0.0082844	0.021424	0.955953	466	1
Slc39a8	3	0.0082941	0.021447	0.955953	467	1
Klk1b16	3	0.0083429	0.021558	0.955953	468	2
Bpifa1	3	0.0083917	0.021688	0.955953	469	1
NonTargetingControlGuideForMouse_0790	1	0.0083989	0.021709	0.955953	470	1
Pdcd6ip	3	0.008433	0.021788	0.955953	471	2
1700013G24Rik	3	0.0084893	0.021927	0.955953	472	1
Pkd1l2	3	0.008494	0.021936	0.955953	473	3
Enoph1	3	0.0085124	0.021983	0.955953	474	3
Gm13139	1	0.0085134	0.021984	0.955953	475	1
Impad1	3	0.008538	0.022044	0.955953	476	1
Gemin6	3	0.0085588	0.022093	0.955953	477	2
Tnfsf9	3	0.0085647	0.022112	0.955953	478	3
LOC101055863	1	0.0085788	0.022143	0.955953	479	1
Atad3a	3	0.0085868	0.022165	0.955953	480	2
Taok1	3	0.0085925	0.022179	0.955953	481	3
Grn	3	0.0085945	0.022185	0.955953	482	3
Ccr6	3	0.0086131	0.022234	0.955953	483	3
Afp	3	0.0086356	0.022297	0.955953	484	1
Gas2l1	3	0.0086753	0.0224	0.955953	485	2
Vmn1r55	3	0.0086844	0.022423	0.955953	486	2
Eya2	3	0.0087332	0.022563	0.955953	487	3
Gm711	3	0.0087415	0.022581	0.955953	488	2
Znrf3	3	0.0087561	0.022618	0.955953	489	3
Arhgap19	3	0.0087568	0.02262	0.955953	490	2
Gphn	3	0.0087772	0.022665	0.955953	491	2
Ubr2	3	0.0087812	0.022674	0.955953	492	3
Tgfbrap1	3	0.008782	0.022677	0.955953	493	1
Tssk1	3	0.0088083	0.02274	0.955953	494	3
Olfr878	3	0.0088125	0.022752	0.955953	495	3
Zcchc8	3	0.0088307	0.022796	0.955953	496	1
AI836003	3	0.0088398	0.022819	0.955953	497	3
Csnk1e	3	0.0088489	0.022849	0.955953	498	2
Isca2	3	0.0088795	0.022925	0.955953	499	2
Ghitm	3	0.0088797	0.022925	0.955953	500	3
Olfr1260	3	0.00889	0.022955	0.955953	501	3
Spry2	3	0.0088944	0.022965	0.955953	502	3
Gm14288	2	0.0089268	0.02305	0.955953	503	1
4930444P10Rik	3	0.0089283	0.023052	0.955953	504	1
M6pr	3	0.0089771	0.023173	0.955953	505	2
Zbtbd6	3	0.0089776	0.023174	0.955953	506	2
Scmh1	3	0.008988	0.023204	0.955953	507	2
Fam83h	3	0.0090258	0.023295	0.955953	508	1
Apobr	3	0.0090475	0.023345	0.955953	509	2
Rsu1	3	0.0090746	0.023414	0.955953	510	2
Wt1	3	0.0091072	0.023495	0.955953	511	2
Rarres2	3	0.0091234	0.023535	0.955953	512	2
Trim7	3	0.0091541	0.023609	0.955953	513	2
Rnf13	3	0.0091593	0.023621	0.955953	514	2
Rbm25	3	0.0091698	0.023647	0.955953	515	2
Plcb2	3	0.0091818	0.023688	0.955953	516	3
Prl3d1	3	0.009184	0.023693	0.955953	517	3
Primpol	3	0.0091958	0.023717	0.955953	518	3
Ext1	3	0.0092142	0.023761	0.955953	519	3
Gabra3	3	0.0092209	0.02378	0.955953	520	2
Mapkapk5	3	0.0092325	0.023805	0.955953	521	2
Slc15a1	3	0.0092812	0.023924	0.955953	522	3
Tnk2	3	0.009292	0.02395	0.955953	523	3
Cacna2d1	3	0.0093185	0.024014	0.955953	524	2
Crlf1	3	0.009327	0.024038	0.955953	525	3
Tpcn2	3	0.0093376	0.024068	0.955953	526	3
Ces1c	3	0.0093672	0.024139	0.955953	527	1
Tor1aip1	3	0.009416	0.024263	0.955953	528	2
Prkra	3	0.0094537	0.024351	0.955953	529	2
H2-Ob	3	0.0094647	0.024376	0.955953	530	1
Acsbg2	3	0.0094749	0.024406	0.955953	531	2
Rab6a	3	0.0095135	0.024501	0.955953	532	1
4930504O13Rik	3	0.0095623	0.024611	0.955953	533	2
Mrpl35	3	0.0095758	0.024646	0.955953	534	2
Fgf22	3	0.0096078	0.024722	0.955953	535	2
Fbxo41	3	0.009611	0.024734	0.955953	536	2
Pddc1	3	0.0096433	0.024827	0.955953	537	3
B3galt4	3	0.009672	0.024894	0.955953	538	2
Tcf23	3	0.0097085	0.024978	0.955953	539	3
Tas2r138	3	0.0097169	0.024997	0.955953	540	3
Habp4	3	0.0097292	0.025025	0.955953	541	3
Ext2	3	0.0097573	0.025102	0.955953	542	2
Wdr11	3	0.0097706	0.025132	0.955953	543	3
Rimbp3	3	0.0097901	0.025179	0.955953	544	2
Unc119	3	0.0098009	0.025208	0.955953	545	2
Olfr1344	3	0.009806	0.02522	0.955953	546	2
Iqck	3	0.0098332	0.025279	0.955953	547	3
1700125H20Rik	3	0.0098548	0.025335	0.955953	548	1
Gprin3	3	0.0098561	0.025339	0.955953	549	3
Ttc27	3	0.0098656	0.02536	0.955953	550	2
Zfp608	3	0.0098873	0.025415	0.955953	551	2
Lamc3	3	0.009936	0.02553	0.955953	552	2
Six1	3	0.0099386	0.025536	0.955953	553	3
Cdr2	3	0.0099522	0.025562	0.955953	554	3
1110034G24Rik	3	0.0099577	0.025569	0.955953	555	2
Olfr812	3	0.0099807	0.025627	0.955953	556	3
Cbx4	3	0.0099943	0.025663	0.955953	557	3
Fen1	3	0.0099966	0.025668	0.955953	558	3
6330408A02Rik	3	0.010001	0.025681	0.955953	559	1
Suclg1	3	0.010006	0.025694	0.955953	560	3
Zpld1	3	0.010023	0.025736	0.955953	561	2
Ear4	3	0.010035	0.025767	0.955953	562	3
Rhox5	3	0.01005	0.025799	0.955953	563	2
Pxdn	3	0.010058	0.02582	0.955953	564	3
Fat4	3	0.010072	0.025847	0.955953	565	3
Btbd8	3	0.010083	0.025874	0.955953	566	2
Hmx2	3	0.010098	0.025904	0.955953	567	2
Kiss1	3	0.010143	0.026006	0.955953	568	3
Ggt5	3	0.010147	0.026017	0.955953	569	2
NonTargetingControlGuideForMouse_0138	1	0.010182	0.026095	0.955953	570	1
Slc20a1	3	0.010196	0.026129	0.955953	571	1
NonTargetingControlGuideForMouse_0314	1	0.010231	0.026216	0.955953	572	1
Zfp708	3	0.010264	0.026298	0.955953	573	2
Rhobtb1	3	0.010293	0.026369	0.955953	574	1
Cited2	3	0.010294	0.02637	0.955953	575	2
Gpi1	3	0.010314	0.026425	0.955953	576	3
Rnasel	3	0.010342	0.026494	0.955953	577	2
Map1s	3	0.010391	0.026605	0.955953	578	1
Tomm40l	3	0.01044	0.02671	0.955953	579	1
Tas2r134	3	0.010443	0.026721	0.955953	580	3
Iyd	3	0.010466	0.026783	0.955953	581	3
Gm17252	3	0.010469	0.026786	0.955953	582	2
Acot1	3	0.010488	0.026834	0.955953	583	1
Pi4k2a	3	0.010504	0.026876	0.955953	584	3
Erp27	3	0.010508	0.026886	0.955953	585	2
Btbd9	3	0.010513	0.026895	0.955953	586	3
Olfr967	3	0.010575	0.027034	0.955953	587	3
Wdr74	3	0.010586	0.027054	0.955953	588	1
Nkd2	3	0.010617	0.027127	0.955953	589	3
Gm8787	3	0.010625	0.027149	0.955953	590	2
Ggt1	3	0.010634	0.027169	0.955953	591	2
Pex11g	3	0.010636	0.027173	0.955953	592	3
Pcmtd2	3	0.01065	0.027205	0.955953	593	3
Plbd1	3	0.010653	0.027212	0.955953	594	2
Ly6g6e	3	0.010683	0.027293	0.955953	596	3
Dxo	3	0.010683	0.027292	0.955953	595	2
Irf2bp2	3	0.010698	0.027329	0.955953	597	2
Lrp6	3	0.010712	0.027361	0.955953	598	3
Zc3h7a	3	0.010732	0.027416	0.955953	599	1
Zscan29	3	0.010781	0.027531	0.955953	600	1
Chac2	3	0.010781	0.027533	0.955953	601	3
Flrt3	3	0.010784	0.027539	0.955953	602	3
Prss29	3	0.010805	0.027589	0.955953	603	3
Gm4894	3	0.010829	0.027653	0.955953	604	1
Gart	3	0.010833	0.027661	0.955953	605	2
Clcn7	3	0.010875	0.027748	0.955953	606	3
2017-09-12	3	0.010878	0.027756	0.955953	607	2
Foxf1	3	0.010887	0.027781	0.955953	608	3
Ciz1	3	0.01089	0.027786	0.955953	609	3
Gpm6b	3	0.010895	0.0278	0.955953	610	2
Usp14	3	0.010916	0.027842	0.955953	611	3
Ticam2	3	0.010921	0.027857	0.955953	612	3
Fxyd1	3	0.010926	0.027865	0.955953	613	3
Gata1	3	0.010927	0.027868	0.955953	614	2
Akip1	3	0.010958	0.027953	0.955953	615	3
Eif6	3	0.010975	0.027998	0.955953	616	1
NonTargetingControlGuideForMouse_0758	1	0.010983	0.028016	0.955953	617	1
Ntn3	3	0.011024	0.028114	0.955953	618	2
Ms4a2	3	0.011049	0.028169	0.955953	619	2
Slc15a2	3	0.011064	0.028206	0.955953	620	3
Olfr776	3	0.011073	0.028227	0.955953	621	3
Wipi1	3	0.011083	0.028256	0.955953	622	2
Gm17384	3	0.01112	0.02835	0.955953	623	3
Vmn1r184	3	0.011122	0.028354	0.955953	624	2
Mphosph10	3	0.01117	0.028463	0.955953	625	1
Olfr27	3	0.011181	0.028492	0.955953	626	3
Tirap	3	0.011219	0.028582	0.955953	627	1
Ybx3	3	0.011235	0.028619	0.955953	628	3
Egfem1	3	0.011282	0.028722	0.955953	629	3
Kitl	3	0.011316	0.028824	0.955953	630	1
Hist1h1d	3	0.011336	0.028872	0.955953	631	2
Klhl41	3	0.011353	0.028911	0.955953	632	2
Rab26	3	0.011365	0.028943	0.955953	633	1
Ttc23l	3	0.011369	0.028951	0.955953	634	3
Trpm8	3	0.011414	0.029056	0.955953	635	1
Dhx58	3	0.011417	0.02906	0.955953	636	2
Myo1d	3	0.011436	0.029114	0.955953	637	3
Stfa1	3	0.011445	0.029133	0.955953	638	3
Jak3	3	0.011462	0.029172	0.955953	639	2
Olfr1010	3	0.011469	0.029189	0.955953	640	3
Resp18	3	0.011503	0.02927	0.955953	641	3
Tfrc	3	0.011511	0.029285	0.955953	642	2
Ubl4a	3	0.011535	0.029335	0.955953	643	3
Dtx4	3	0.011546	0.02937	0.955953	644	3
Tmed3	3	0.011556	0.029396	0.955953	645	3
Trim10	3	0.01156	0.029404	0.955953	646	2
Ccdc97	3	0.011561	0.029405	0.955953	647	3
Rbm44	3	0.011584	0.029458	0.955953	648	3
Pip4k2a	3	0.011656	0.02962	0.955953	649	2
C2cd4c	3	0.011657	0.029623	0.955953	650	2
Prtn3	3	0.011691	0.029704	0.955953	651	3
Ces3a	3	0.011706	0.029745	0.955953	652	2
Olfr730	3	0.01171	0.029752	0.955953	653	3
Ndufa8	3	0.011712	0.029757	0.955953	654	3
Olfr1056	3	0.011726	0.029792	0.955953	655	3
Slc35d1	3	0.011732	0.029807	0.955953	656	2
NonTargetingControlGuideForMouse_0639	1	0.011736	0.029811	0.955953	657	1
Tdrd12	3	0.011755	0.029853	0.955953	658	2
Olfr1279	3	0.01176	0.029867	0.955953	659	3
Spred1	3	0.011761	0.02987	0.955953	660	2
Klf15	3	0.011788	0.029926	0.955953	661	3
Olfr1449	3	0.011803	0.029961	0.955953	662	3
Rasl10b	3	0.011819	0.030002	0.955953	663	3
Bbs9	3	0.01182	0.030004	0.955953	664	2
Rad23a	3	0.011826	0.030019	0.955953	665	3
Olfr1168	3	0.011829	0.030026	0.955953	666	3
Cyp2d26	3	0.011849	0.030074	0.955953	667	3
Fgl1	3	0.011852	0.030082	0.955953	668	2
Olfr692	3	0.01187	0.030126	0.955953	669	3
Syndig1l	3	0.011901	0.030199	0.955953	670	1
Isyna1	3	0.011903	0.030205	0.955953	671	2
Foxd2	3	0.011921	0.030244	0.955953	672	3
Tom1	3	0.011949	0.030313	0.955953	673	1
Dyrk1b	3	0.011998	0.030434	0.955953	674	1
Klhdc2	3	0.012021	0.03049	0.955953	675	3
Cml2	3	0.012039	0.030539	0.955953	676	3
Chtop	3	0.012047	0.030556	0.955953	677	1
Tmem231	3	0.012051	0.030564	0.955953	678	2
Ahsa1	3	0.012057	0.030579	0.955953	679	3
Tsku	3	0.012069	0.030605	0.955953	680	3
Phax	3	0.012095	0.030665	0.955953	681	2
C3ar1	3	0.012129	0.030741	0.955953	682	3
Ptges3l	3	0.012144	0.030776	0.955953	683	1
Klf17	3	0.012158	0.030807	0.955953	684	2
Klhl31	3	0.012193	0.030897	0.955953	685	2
Rmi1	3	0.012194	0.030901	0.955953	686	2
Cnga2	3	0.012213	0.030944	0.955953	687	3
Ube2l3	3	0.012248	0.031026	0.955953	688	2
Ssty2	2	0.012278	0.031101	0.955953	689	2
Cdo1	3	0.012281	0.03111	0.955953	690	2
Sbno1	3	0.01229	0.031127	0.955953	691	2
Tmem222	3	0.012296	0.031145	0.955953	692	3
1700092M07Rik	3	0.012339	0.031254	0.955953	693	1
Mmrn1	3	0.012343	0.031262	0.955953	694	3
Plcb4	3	0.012356	0.031288	0.955953	695	2
Gramd2	3	0.012374	0.031338	0.955953	696	2
Tigd5	3	0.012387	0.031368	0.955953	697	1
Zfp935	2	0.012398	0.031396	0.955953	698	2
Purb	3	0.012419	0.03145	0.955953	700	2
Olfr433	3	0.012419	0.03145	0.955953	699	2
Gin1	3	0.012425	0.03146	0.955953	701	3
Pklr	3	0.012436	0.031495	0.955953	702	1
Nlrp9b	3	0.012453	0.031536	0.955953	703	2
Chst8	3	0.012519	0.031705	0.959266	704	2
Slc38a8	3	0.012533	0.031735	0.959266	705	1
B4galt7	3	0.012582	0.031847	0.959542	706	2
Rnase6	3	0.012626	0.031956	0.959542	707	3
Spata5l1	3	0.012631	0.031965	0.959542	708	1
Adm2	3	0.012677	0.032092	0.959542	709	2
Abhd3	3	0.012679	0.032099	0.959542	710	1
Casp4	3	0.01272	0.032197	0.959542	711	2
Creb3l2	3	0.01274	0.032252	0.959542	712	3
Pspc1	3	0.012769	0.032321	0.959542	713	2
Ganc	3	0.012775	0.032341	0.959542	714	3
Gfra3	3	0.012786	0.032364	0.959542	715	3
Rwdd4a	3	0.012825	0.032456	0.959542	716	2
Iah1	3	0.012867	0.032549	0.959542	717	2
Lrif1	3	0.012874	0.032563	0.959542	718	1
Emilin2	3	0.012891	0.032602	0.959542	719	3
Fancm	3	0.012922	0.032676	0.959542	720	2
Vmn2r60	3	0.012923	0.032677	0.959542	721	1
Ppp1r11	3	0.012931	0.032694	0.959542	722	2
Vps37d	3	0.012971	0.032785	0.959542	723	2
Ep400	3	0.01302	0.032898	0.959542	724	1
Mfng	3	0.013033	0.032929	0.959542	725	3
Pllp	3	0.013068	0.033015	0.959542	726	2
Rap1gap	3	0.013082	0.033045	0.959542	727	2
Naalad2	3	0.013086	0.033058	0.959542	728	3
Ndufa5	3	0.013117	0.033134	0.959542	729	1
Rab25	3	0.013166	0.033258	0.959542	730	2
Cnnm3	3	0.013214	0.033376	0.959542	731	1
Nrsn1	3	0.013216	0.033379	0.959542	732	3
Tmem72	3	0.013223	0.033397	0.959542	733	3
Hgs	3	0.013226	0.033407	0.959542	734	3
Stx1a	3	0.013263	0.03349	0.959542	735	1
Tmem170	3	0.013268	0.033505	0.959542	736	2
Procr	3	0.013278	0.033524	0.959542	737	3
Tepp	3	0.013312	0.03361	0.959542	738	1
Fam65a	3	0.013322	0.033642	0.959542	739	3
Tmem218	3	0.013325	0.033649	0.959542	740	3
Cd300c	3	0.013333	0.033666	0.959542	741	3
Plxnc1	3	0.013338	0.03368	0.959542	742	3
Vmn2r70	3	0.013341	0.033689	0.959542	743	3
Bicd1	3	0.013347	0.033702	0.959542	744	3
Map4k4	3	0.013391	0.033806	0.959542	745	3
Prkaa2	3	0.013393	0.03381	0.959542	746	2
Metrnl	3	0.013398	0.033818	0.959542	747	3
Tex29	3	0.013409	0.03384	0.959542	748	1
Cep170b	3	0.013421	0.033875	0.959542	749	3
Xpnpep3	3	0.013458	0.033961	0.959542	750	2
Spc25	3	0.013506	0.034064	0.959542	751	2
Olfr943	3	0.013518	0.034097	0.959542	752	3
Snx15	3	0.013555	0.034186	0.959542	753	2
Pcsk6	3	0.013581	0.034246	0.959542	754	2
Olfr1366	3	0.013613	0.034317	0.959542	755	3
Reg3g	3	0.013647	0.034398	0.959542	756	2
4932443I19Rik	3	0.013652	0.034409	0.959542	757	2
Rab5b	3	0.013686	0.034489	0.959542	758	3
Trafd1	3	0.013695	0.034511	0.959542	759	2
Abtb2	3	0.013743	0.034642	0.959542	760	3
Mfsd5	3	0.013749	0.034656	0.959542	761	2
Gnb4	3	0.01379	0.034748	0.959542	762	2
Adamts19	3	0.013798	0.034764	0.959542	763	1
Vmn1r60	3	0.013813	0.034803	0.959542	764	3
Egfl7	3	0.013821	0.034829	0.959542	765	2
Mkl1	3	0.013847	0.034886	0.959542	766	1
NonTargetingControlGuideForMouse_0921	1	0.013862	0.03492	0.959542	767	1
Larp6	3	0.013879	0.034969	0.959542	768	2
Rbfox3	3	0.013895	0.035005	0.959542	769	2
Nr1d1	3	0.013898	0.035013	0.959542	770	2
Olfr883	3	0.01393	0.03509	0.959542	771	3
Tlk2	3	0.013944	0.035124	0.959542	772	1
S100a4	3	0.013955	0.035151	0.959542	773	3
Smg9	3	0.013974	0.035199	0.959542	774	2
Gm14092	3	0.013981	0.035214	0.959542	775	2
Cplx3	3	0.013992	0.035243	0.959542	776	2
1700010B08Rik	3	0.014025	0.035322	0.959542	777	2
4930596D02Rik	3	0.014032	0.035336	0.959542	779	3
Aph1a	3	0.014032	0.035336	0.959542	778	2
Mug2	3	0.014041	0.035359	0.959542	780	1
Gm7714	3	0.014066	0.035421	0.959542	781	3
Gm2030	1	0.014074	0.035434	0.959542	782	1
Mbl2	3	0.01409	0.03547	0.959542	783	2
Ubac2	3	0.014108	0.035517	0.959542	784	3
Scp2	3	0.014209	0.035766	0.959542	785	3
Acbd5	3	0.014231	0.035819	0.959542	786	2
Ppp1r16a	3	0.014235	0.03583	0.959542	788	3
Olfr1094	3	0.014235	0.03583	0.959542	787	1
Wdr25	3	0.014284	0.035962	0.959542	789	1
Msh5	3	0.014293	0.035983	0.959542	790	3
Tceb3	3	0.014333	0.036081	0.959542	791	2
Acsl6	3	0.014366	0.036153	0.959542	792	3
Fkbp1a	3	0.014374	0.036172	0.959542	793	3
Olfr609	3	0.014381	0.036188	0.959542	794	1
Rplp0	3	0.014392	0.036215	0.959542	795	2
Ppm1e	3	0.014411	0.036257	0.959542	796	2
Rpa3	3	0.01443	0.036304	0.959542	797	1
Chil1	3	0.014438	0.036326	0.959542	798	3
Adam29	3	0.014444	0.036341	0.959542	799	3
2017-09-10	3	0.01445	0.036357	0.959542	800	3
Syde1	3	0.014478	0.036415	0.959542	801	1
Chodl	3	0.014522	0.036511	0.959542	802	2
4930562C15Rik	3	0.014527	0.036523	0.959542	803	2
Apool	3	0.014528	0.036526	0.959542	804	3
Ube2d2a	3	0.014534	0.036535	0.959542	805	3
Lrrc40	3	0.014576	0.036628	0.959542	806	2
Hoxc11	3	0.014624	0.036752	0.959542	807	1
Gm12171	3	0.014632	0.036766	0.959542	808	3
Shroom1	3	0.014665	0.036848	0.959542	809	2
Strn3	3	0.014673	0.036871	0.959542	810	2
Slc29a2	3	0.014721	0.036988	0.959542	811	2
Igfbp3	3	0.01477	0.037097	0.959542	812	1
4921506M07Rik	3	0.01479	0.037146	0.959542	813	3
NonTargetingControlGuideForMouse_0093	1	0.014794	0.037155	0.959542	814	1
Kcne3	3	0.014796	0.037158	0.959542	815	2
Syne1	3	0.014802	0.037175	0.959542	816	2
Mta1	3	0.014818	0.037211	0.959542	817	2
Pkd2l2	3	0.014837	0.037256	0.959542	819	3
Ppfia4	3	0.014837	0.037256	0.959542	818	3
Oit3	3	0.014842	0.037263	0.959542	820	2
Mrpl38	3	0.014867	0.037313	0.959542	821	1
Tesc	3	0.014916	0.037413	0.959542	822	1
Atp6v0b	3	0.014953	0.037501	0.959542	823	2
Atxn7l3b	3	0.014964	0.037531	0.959542	824	1
Farp2	3	0.014998	0.037605	0.959542	825	3
Tnfsf13	3	0.015006	0.037628	0.959542	826	2
Gm4925	3	0.015013	0.037642	0.959542	827	1
Clca2	2	0.01504	0.037711	0.959542	828	2
NonTargetingControlGuideForMouse_0569	1	0.015056	0.03775	0.959542	829	1
Slc25a31	3	0.015061	0.037762	0.959542	830	2
Fgb	3	0.015091	0.03783	0.959542	831	3
Fam124b	3	0.01511	0.03788	0.959542	832	2
9430038I01Rik	3	0.015118	0.037901	0.959542	833	2
Map3k3	3	0.015142	0.037951	0.959542	834	3
Bysl	3	0.015159	0.037983	0.959542	835	1
Rslcan18	3	0.015165	0.037998	0.959542	836	2
Grip1	3	0.015207	0.038104	0.959542	837	1
Atxn3	3	0.015232	0.038158	0.959542	838	3
Kmt2d	3	0.015251	0.038206	0.959542	839	2
Brox	3	0.015256	0.038216	0.959542	840	3
Pkp2	3	0.015289	0.038282	0.959542	841	3
Zbtb1	3	0.015298	0.038305	0.959542	842	3
Ust	3	0.015301	0.038309	0.959542	843	3
Psmb8	3	0.015304	0.038318	0.959542	844	1
Hlf	3	0.015323	0.038361	0.959542	845	3
Olfr555	3	0.015324	0.038364	0.959542	846	2
Dbh	3	0.015344	0.03841	0.959542	847	3
Rnf169	3	0.015353	0.038438	0.959542	848	1
Med31	3	0.015374	0.038501	0.959542	849	3
Dpp4	3	0.015378	0.038511	0.959542	850	2
Cpeb1	3	0.015401	0.038569	0.959542	851	2
9930012K11Rik	3	0.015411	0.038589	0.959542	852	2
Cdca7	3	0.015432	0.038638	0.959542	853	3
Rftn2	3	0.015438	0.038652	0.959542	854	3
Wtip	3	0.015487	0.038763	0.959542	855	3
Cherp	3	0.01549	0.038768	0.959542	856	3
Bicd2	3	0.015497	0.038784	0.959542	857	3
Chtf8	3	0.015498	0.038788	0.959542	858	2
Oc90	3	0.015516	0.038826	0.959542	859	3
Gpr15	3	0.015542	0.038887	0.959542	860	3
Tarsl2	3	0.015547	0.038899	0.959542	861	2
Sipa1l3	3	0.015551	0.038906	0.959542	862	3
Ttc9	3	0.015565	0.038936	0.959542	863	2
Nuak1	3	0.015578	0.038968	0.959542	864	3
Trim30d	3	0.015596	0.039011	0.959542	865	1
Krt4	3	0.015599	0.039019	0.959542	866	2
Chrnb2	3	0.015644	0.039126	0.959542	867	1
Olfr122	3	0.015658	0.039162	0.959542	868	3
NonTargetingControlGuideForMouse_0889	1	0.015677	0.039211	0.959542	869	1
Tmem51	3	0.01568	0.039214	0.959542	870	2
Ddit3	3	0.015693	0.03924	0.959542	871	1
Ppp2r2b	3	0.015707	0.039277	0.959542	872	3
Atp6v0e	3	0.015741	0.039338	0.959542	873	2
Idh2	3	0.01579	0.039459	0.959542	874	1
Agtpbp1	3	0.015815	0.039525	0.959542	875	3
Iars	3	0.015838	0.039576	0.959542	876	2
Mgat5	3	0.015868	0.039651	0.959542	877	3
Apol7b	3	0.015887	0.039691	0.959542	878	2
Tmem67	3	0.015903	0.039722	0.959542	879	2
Ncstn	3	0.015909	0.03974	0.959542	880	2
Gnat3	3	0.015935	0.039805	0.959542	881	1
3632451O06Rik	3	0.015964	0.039878	0.959542	882	3
Sh3gl3	3	0.015967	0.039887	0.959542	883	3
Cant1	3	0.015976	0.039912	0.959542	884	3
Sdhc	3	0.015984	0.039929	0.959542	885	2
Notum	3	0.016004	0.039986	0.959542	886	3
Agl	3	0.016022	0.04003	0.959542	887	3
Lmna	3	0.016032	0.04006	0.959542	888	2
Wdr93	3	0.016052	0.040114	0.959542	889	3
Gfm1	3	0.016081	0.040192	0.959542	890	2
Olfr1046	3	0.01613	0.040311	0.959542	891	1
Fignl1	3	0.016148	0.040354	0.959542	892	2
Rbm10	3	0.016155	0.040373	0.959542	893	2
NonTargetingControlGuideForMouse_0957	1	0.016168	0.040404	0.959542	894	1
Ptdss1	3	0.016178	0.040428	0.959542	895	2
Irgc1	3	0.016227	0.040535	0.959542	896	2
Spaca4	3	0.01623	0.040541	0.959542	897	3
Irf2bp1	3	0.016236	0.040556	0.959542	898	3
Lhx8	3	0.016275	0.04065	0.959542	899	2
Slc24a2	3	0.016324	0.040755	0.959542	900	2
Tmem147	3	0.016367	0.040863	0.959542	902	3
Fzd3	3	0.016367	0.040863	0.959542	901	3
Lama4	3	0.016374	0.040878	0.959542	903	2
Ccdc54	3	0.016394	0.040923	0.959542	904	3
Soga3	3	0.016435	0.041024	0.959542	905	3
Alpi	3	0.016449	0.041055	0.959542	906	3
Btf3l4	3	0.016469	0.041099	0.959542	907	2
Nhlrc2	3	0.01648	0.041122	0.959542	908	3
Ints10	3	0.016499	0.041172	0.959542	909	3
Olfr312	3	0.016505	0.041181	0.959542	910	2
Bex4	3	0.016518	0.041207	0.959542	911	1
Mrvi1	3	0.016553	0.041287	0.959542	912	3
Srfbp1	3	0.016566	0.041318	0.959542	913	1
Plxnb2	3	0.016575	0.041339	0.959542	914	3
Cd72	3	0.016582	0.041356	0.959542	915	3
Trmu	3	0.016588	0.041368	0.959542	916	2
Nudt3	3	0.016595	0.041386	0.959542	917	3
Pcm1	3	0.016608	0.041417	0.959542	918	2
Ndufb3	3	0.016615	0.041439	0.959542	919	2
Dusp26	3	0.016617	0.041442	0.959542	920	3
Lgr4	3	0.016639	0.041492	0.959542	921	3
Rbm38	3	0.016652	0.041516	0.959542	922	3
Pgk2	3	0.016706	0.041651	0.959988	923	2
Ntrk2	3	0.016712	0.041668	0.959988	924	2
Atf7ip2	3	0.016726	0.0417	0.959988	925	2
Drg2	3	0.016735	0.041721	0.959988	926	3
Ackr4	3	0.016803	0.041881	0.959988	927	3
Tcp1	3	0.016809	0.041895	0.959988	928	1
Aldh4a1	3	0.016852	0.04199	0.959988	929	2
Bcl2l14	3	0.016858	0.042005	0.959988	930	2
Tmem154	3	0.016873	0.042041	0.959988	931	2
Olfr211	3	0.016877	0.042049	0.959988	932	3
Prss23	3	0.016886	0.042069	0.959988	933	2
Pcdhga8	2	0.016889	0.042078	0.959988	934	1
Pik3cg	3	0.016906	0.042121	0.959988	935	1
Cdc42	3	0.016955	0.042233	0.961523	936	2
Zc3h4	3	0.016988	0.042321	0.962101	937	3
F12	3	0.017003	0.042349	0.962101	938	1
Fbxw4	3	0.017052	0.042458	0.963565	939	2
Arhgap20	3	0.017096	0.042565	0.963981	940	3
Smim5	3	0.0171	0.042578	0.963981	941	1
Cnrip1	3	0.017149	0.042688	0.963981	942	2
Ppp2r1b	3	0.017197	0.042795	0.963981	943	2
Pfkfb3	3	0.017202	0.042803	0.963981	944	2
Olfr448	3	0.017237	0.042897	0.963981	945	2
Gm9	3	0.017244	0.042908	0.963981	946	3
Shq1	3	0.017246	0.042912	0.963981	947	2
Ugcg	3	0.01729	0.043018	0.963981	948	3
Fermt2	3	0.017294	0.043032	0.963981	949	1
Hr	3	0.017336	0.043131	0.963981	950	2
Alg11	3	0.017343	0.043149	0.963981	951	1
Ubxn8	3	0.017353	0.043175	0.963981	952	3
Tbx22	3	0.017364	0.0432	0.963981	953	2
Gm6289	3	0.017391	0.043258	0.963981	954	2
Mum1l1	3	0.017428	0.043343	0.963981	955	3
Tspan10	3	0.01744	0.043365	0.963981	956	1
Nostrin	3	0.017484	0.043484	0.963981	957	3
Cage1	3	0.017488	0.04349	0.963981	958	2
Vangl2	3	0.017506	0.043528	0.963981	959	3
Sike1	3	0.017534	0.043602	0.963981	960	2
Tnfrsf25	3	0.017537	0.043607	0.963981	961	2
Fra10ac1	3	0.017555	0.043649	0.963981	962	2
Asic2	3	0.017564	0.043672	0.963981	963	3
Lysmd3	3	0.017585	0.043718	0.963981	964	2
Scgb1b30	3	0.017619	0.043787	0.963981	965	3
Dera	3	0.017634	0.043821	0.963981	966	2
Ebi3	3	0.017682	0.04394	0.963981	967	3
Fam26f	3	0.017687	0.04395	0.963981	968	3
Rundc3b	3	0.017731	0.044054	0.963981	969	1
Col6a2	3	0.017741	0.044071	0.963981	970	2
Suv420h2	3	0.017779	0.044152	0.963981	971	2
Tas2r122	3	0.017794	0.044181	0.963981	972	3
Epha2	3	0.017826	0.044255	0.963981	973	2
Gm14151	3	0.017828	0.044257	0.963981	974	1
Arx	3	0.017862	0.044342	0.963981	975	2
Srp68	3	0.017876	0.044368	0.963981	976	2
Gskip	3	0.017881	0.044377	0.963981	977	3
Ecel1	3	0.017884	0.044383	0.963981	978	3
Calcrl	3	0.017888	0.044389	0.963981	979	3
Krt79	3	0.017905	0.044432	0.963981	980	2
Spint1	3	0.017908	0.044437	0.963981	981	3
Cyp3a41b	1	0.017918	0.044457	0.963981	982	1
Aars	3	0.017925	0.044472	0.963981	983	2
Fgfr3	3	0.017973	0.044583	0.963981	984	2
Ntsr1	3	0.018021	0.044699	0.963981	985	2
1110008P14Rik	3	0.018025	0.044708	0.963981	986	3
Fars2	3	0.018056	0.044772	0.963981	987	3
Pou1f1	3	0.018063	0.044794	0.963981	988	3
Rundc3a	3	0.01807	0.044808	0.963981	989	3
1700021F05Rik	3	0.018078	0.044822	0.963981	990	2
B3gnt9	3	0.018093	0.044864	0.963981	991	3
Nyap2	3	0.018114	0.044909	0.963981	992	2
Tgs1	3	0.018118	0.044919	0.963981	993	2
Casd1	3	0.018154	0.044997	0.964262	994	3
Olfr288	3	0.018167	0.045023	0.964262	995	1
Gtsf1l	3	0.018186	0.045071	0.9643	996	2
Tmem131	3	0.018215	0.045143	0.9643	997	3
Pcdhb2	3	0.018224	0.045161	0.9643	998	3
Hrct1	3	0.018251	0.045231	0.964831	999	2
2410004P03Rik	3	0.018285	0.045306	0.96547	1000	3
Cd200r3	3	0.018312	0.045369	0.965841	1001	2
Tbc1d12	3	0.018411	0.045601	0.968206	1002	3
Cdk5	3	0.018428	0.045639	0.968206	1003	3
Ang3	3	0.01844	0.045663	0.968206	1004	3
Srpk2	3	0.018458	0.0457	0.968206	1005	2
Itga4	3	0.018461	0.045707	0.968206	1006	2
Asb14	3	0.018505	0.045811	0.969447	1007	3
Oprd1	3	0.018536	0.045879	0.969929	1008	3
Efhd1	3	0.018555	0.045928	0.969998	1009	2
Mast4	3	0.018603	0.046039	0.971142	1010	1
Agfg1	3	0.018629	0.046105	0.971142	1011	3
Klk6	3	0.018652	0.04616	0.971142	1012	3
Pkd1l3	3	0.018666	0.04619	0.971142	1013	3
Ubqlnl	3	0.018672	0.04621	0.971142	1014	3
Ercc6l	3	0.0187	0.04628	0.971289	1015	2
Wipi2	3	0.018736	0.046359	0.971289	1016	3
Cubn	3	0.018748	0.046381	0.971289	1017	1
Dmc1	3	0.018767	0.046429	0.971289	1018	3
Prmt6	3	0.018776	0.046454	0.971289	1019	2
Mapkapk2	3	0.018823	0.046566	0.971289	1020	3
Mef2d	3	0.018844	0.04662	0.971289	1021	3
Fam19a2	3	0.018845	0.046625	0.971289	1022	2
Trpm1	3	0.018856	0.046647	0.971289	1023	3
H2-M2	3	0.018885	0.046713	0.971289	1024	3
C2cd2l	3	0.018915	0.046784	0.971289	1025	2
Hnf4a	3	0.018923	0.046805	0.971289	1026	2
Dtwd2	3	0.018942	0.046849	0.971289	1027	2
Caap1	3	0.018945	0.046855	0.971289	1028	2
Setd3	3	0.018991	0.046965	0.971994	1029	1
Arid3a	3	0.018997	0.04698	0.971994	1030	3
Wnt5b	3	0.019039	0.047067	0.972837	1031	1
Usf1	3	0.019127	0.047262	0.973571	1032	3
Tmprss15	3	0.019136	0.047285	0.973571	1033	1
Ythdf1	3	0.019137	0.047286	0.973571	1034	2
Shank3	3	0.019184	0.047389	0.973571	1035	1
Pmch	3	0.019233	0.047503	0.973571	1036	2
AI429214	3	0.019281	0.047623	0.973571	1037	1
Gm17455	3	0.019352	0.047777	0.973571	1038	2
Ifi204	2	0.019363	0.047801	0.973571	1039	2
Nxph4	3	0.019374	0.047825	0.973571	1040	2
Cp	3	0.019378	0.047836	0.973571	1041	1
Rnf10	3	0.019381	0.047843	0.973571	1042	2
Pcdh11x	3	0.019411	0.047911	0.973571	1043	3
Elavl4	3	0.019493	0.048107	0.973571	1044	2
Nphs1	3	0.019501	0.048132	0.973571	1045	3
Ski	3	0.019526	0.048176	0.973571	1046	3
Gabarap	3	0.019529	0.048186	0.973571	1047	3
Hcn4	3	0.019583	0.048301	0.973571	1048	2
Kdm4c	3	0.01959	0.04832	0.973571	1049	3
Synrg	3	0.019613	0.048374	0.973571	1050	2
Mettl14	3	0.01962	0.048396	0.973571	1051	1
Krt9	3	0.019624	0.048406	0.973571	1052	3
Fchsd1	3	0.019633	0.048426	0.973571	1053	3
Dhfr	3	0.019669	0.048516	0.973571	1054	1
Orm3	3	0.019673	0.048524	0.973571	1055	2
Cadps	3	0.019676	0.04853	0.973571	1056	3
Cxxc5	3	0.019717	0.048625	0.973571	1057	3
Ift140	3	0.019718	0.048626	0.973571	1058	2
Pnma2	3	0.019731	0.048654	0.973571	1059	3
AU022751	3	0.019733	0.04866	0.973571	1060	2
Nrarp	3	0.019862	0.048951	0.973571	1061	1
Cc2d1b	3	0.019876	0.048976	0.973571	1062	2
Apob	3	0.019911	0.049061	0.973571	1063	2
Ncoa2	3	0.019959	0.049164	0.973571	1064	2
Gnas	3	0.019966	0.049183	0.973571	1065	2
Ube4a	3	0.019974	0.049204	0.973571	1066	3
Vill	3	0.019989	0.049232	0.973571	1067	2
Zfp810	3	0.020027	0.049308	0.973571	1068	2
Jmjd4	3	0.020034	0.049325	0.973571	1069	2
4930579F01Rik	3	0.020105	0.049481	0.973571	1070	2
Tas2r131	3	0.020117	0.049517	0.973571	1071	2
Trerf1	3	0.020144	0.049571	0.973571	1072	3
Nfs1	3	0.020148	0.049578	0.973571	1073	2
Odam	3	0.020153	0.049592	0.973571	1074	2
Ffar1	3	0.020155	0.049596	0.973571	1075	2
Krt40	3	0.020166	0.049626	0.973571	1076	3
Olfr770	3	0.020199	0.0497	0.973571	1077	3
Ttc21a	3	0.020201	0.049706	0.973571	1078	2
Gca	3	0.020224	0.049768	0.973571	1079	3
Slc25a3	3	0.02025	0.049834	0.973571	1080	2
H2-Bl	3	0.020279	0.049906	0.973571	1081	3
Btbd16	3	0.020298	0.049951	0.973571	1082	2
NonTargetingControlGuideForMouse_0210	1	0.020355	0.050085	0.973571	1083	1
Sec23a	3	0.020378	0.050139	0.973571	1084	3
Ccdc142	3	0.020395	0.050182	0.973571	1085	2
Polr1e	3	0.020406	0.050203	0.973571	1086	2
Smdt1	3	0.020421	0.050243	0.973571	1087	3
Spic	3	0.020443	0.050285	0.973571	1088	2
Commd6	3	0.020486	0.050375	0.973571	1089	3
Pcsk5	3	0.020524	0.050471	0.973571	1090	3
L2hgdh	3	0.020589	0.050613	0.973571	1091	2
Tcerg1l	3	0.020606	0.050661	0.973571	1092	3
Dydc1	3	0.020636	0.050723	0.973571	1093	2
Myof	3	0.020637	0.050726	0.973571	1094	1
Orm1	3	0.020641	0.050736	0.973571	1095	3
Prr7	3	0.020666	0.05079	0.973571	1096	2
Olfr1031	3	0.020674	0.050812	0.973571	1097	2
Ptprh	3	0.020685	0.050839	0.973571	1098	1
Yaf2	3	0.020697	0.050861	0.973571	1099	2
Olfr1499	3	0.020705	0.050874	0.973571	1100	2
Pcbp4	3	0.020753	0.050977	0.973571	1101	3
Sccpdh	3	0.020761	0.050993	0.973571	1102	3
Tmprss7	3	0.020782	0.051048	0.973571	1103	2
Bgn	3	0.02082	0.05113	0.973571	1104	3
Sbsn	3	0.02083	0.051157	0.973571	1105	1
Dsc3	3	0.020835	0.051169	0.973571	1106	2
Anxa9	3	0.020879	0.05128	0.973571	1107	1
Caskin1	3	0.020887	0.051298	0.973571	1108	3
Cdc42ep2	3	0.020912	0.051364	0.973571	1109	3
Zpbp	3	0.020927	0.051393	0.973571	1110	1
Slc39a5	3	0.020976	0.051502	0.973571	1111	2
Tspan13	3	0.021024	0.051611	0.973571	1112	1
Rpl22l1	3	0.021029	0.051621	0.973571	1113	3
Lgi3	3	0.021062	0.051695	0.973571	1114	3
Speg	3	0.021072	0.051716	0.973571	1115	3
Peg10	3	0.021075	0.051721	0.973571	1116	2
Gm7102	3	0.021098	0.051773	0.973571	1117	3
Mcm10	3	0.021115	0.05181	0.973571	1118	3
Tspyl5	3	0.021121	0.051823	0.973571	1119	1
Phb	3	0.021184	0.051963	0.973571	1120	3
Olfr374	3	0.021216	0.05204	0.973571	1121	3
Usp19	3	0.021217	0.052044	0.973571	1122	1
Dnajc1	3	0.02122	0.052046	0.973571	1123	3
Tab3	3	0.021314	0.052257	0.973571	1124	3
Tmem143	3	0.021331	0.052291	0.973571	1125	3
Ncf1	3	0.021339	0.052307	0.973571	1126	3
Pip5k1c	3	0.021363	0.052358	0.973571	1127	2
Cds1	3	0.021411	0.052478	0.973571	1128	1
Gpihbp1	3	0.021417	0.052488	0.973571	1129	3
Ncf4	3	0.021459	0.052592	0.973571	1130	2
Olfr247	3	0.021508	0.052705	0.973571	1131	1
Pramef17	3	0.021547	0.052804	0.973571	1132	3
Aco2	3	0.021556	0.052826	0.973571	1133	1
Gja3	3	0.021604	0.052926	0.973571	1134	2
Spg20	3	0.021625	0.052971	0.973571	1135	3
NonTargetingControlGuideForMouse_0009	1	0.021664	0.053052	0.973571	1136	1
Oas1e	3	0.021675	0.053074	0.973571	1137	2
Ppapdc2	3	0.021701	0.053126	0.973571	1138	1
Zmat3	3	0.02173	0.053184	0.973571	1139	2
Mrps5	3	0.021737	0.053203	0.973571	1140	2
Zfp869	3	0.021774	0.053287	0.973571	1141	2
Prelid2	3	0.021774	0.053287	0.973571	1142	3
Hfm1	3	0.021792	0.053331	0.973571	1143	2
Meox1	3	0.021812	0.053373	0.973571	1144	3
Gm10767	3	0.021816	0.05338	0.973571	1145	3
Eif4e	3	0.021846	0.053449	0.973571	1146	1
NonTargetingControlGuideForMouse_0757	1	0.021876	0.053518	0.973571	1147	1
2310007L24Rik	3	0.021891	0.053555	0.973571	1148	3
Ppp1r35	3	0.021895	0.053562	0.973571	1149	1
Tnnc1	3	0.0219	0.053577	0.973571	1150	3
4930513O06Rik	3	0.02192	0.053619	0.973571	1151	3
Cox8c	3	0.021927	0.053638	0.973571	1152	3
Scml4	3	0.021939	0.05366	0.973571	1153	3
Cnot8	3	0.021943	0.053668	0.973571	1154	2
Aasdhppt	3	0.021964	0.053721	0.973571	1155	3
2700081O15Rik	3	0.021991	0.053777	0.973571	1156	2
Sim1	3	0.022008	0.053815	0.973571	1157	3
Cel	3	0.022009	0.053816	0.973571	1158	2
4930433I11Rik	3	0.02204	0.053884	0.973571	1159	1
Nmrk1	3	0.022081	0.053981	0.973571	1160	3
Lpar5	3	0.022088	0.053992	0.973571	1161	2
Dhodh	3	0.022108	0.054035	0.973571	1162	3
Olfr969	3	0.022116	0.054056	0.973571	1163	2
Smim12	3	0.022136	0.054108	0.973571	1164	2
Caln1	3	0.02214	0.054117	0.973571	1165	2
Dppa1	3	0.022159	0.054152	0.973571	1166	3
Olfr1215	3	0.022185	0.054219	0.973571	1167	2
Iqsec2	3	0.022205	0.054267	0.973571	1168	3
Amfr	3	0.022211	0.054274	0.973571	1169	2
Sdpr	3	0.022223	0.054303	0.973571	1170	3
Vezf1	3	0.022233	0.054328	0.973571	1171	1
Snap47	3	0.022244	0.054352	0.973571	1172	3
Rab11fip1	3	0.022267	0.054405	0.973571	1173	3
Pcdhb10	3	0.022281	0.054437	0.973571	1174	1
Rnf157	3	0.022314	0.054511	0.973571	1175	2
Cdk18	3	0.022326	0.054534	0.973571	1176	3
Dkk1	3	0.02233	0.054546	0.973571	1178	2
Shh	3	0.02233	0.054546	0.973571	1177	1
Wwp2	3	0.022361	0.05461	0.973571	1179	3
Smc6	3	0.022378	0.054647	0.973571	1180	2
Slc47a1	3	0.022426	0.054763	0.973571	1181	2
Wnt6	3	0.022482	0.054882	0.973571	1182	2
Hils1	3	0.02249	0.054902	0.973571	1183	3
Lcmt2	3	0.022545	0.055031	0.973571	1184	2
Sftpd	3	0.022571	0.05509	0.973571	1185	1
Gzmb	3	0.022599	0.055154	0.973571	1186	3
Nat10	3	0.02262	0.055206	0.973571	1187	1
Tchh	3	0.022627	0.055223	0.973571	1188	3
Gm1553	3	0.02266	0.055287	0.973571	1189	3
Pdxk	3	0.022668	0.05531	0.973571	1190	2
Hoxc8	3	0.022709	0.0554	0.973571	1191	3
BC030336	3	0.022716	0.055417	0.973571	1192	2
Ccdc88a	3	0.022756	0.055508	0.973571	1193	3
Dpf3	3	0.02276	0.055519	0.973571	1194	3
Nat14	3	0.022765	0.055529	0.973571	1195	1
Serpine1	3	0.02281	0.05564	0.973571	1196	2
Olfr1148	3	0.022813	0.05565	0.973571	1197	3
Sfrs18	3	0.022845	0.055719	0.973571	1198	3
Xndr-trpc2	2	0.022848	0.055728	0.973571	1199	2
Skida1	3	0.02285	0.055732	0.973571	1200	2
Olfr1264	3	0.022861	0.055752	0.973571	1201	1
Adamtsl2	3	0.022866	0.055765	0.973571	1202	2
Pramel3	2	0.022888	0.055811	0.973571	1203	2
Olfr750	3	0.02291	0.055864	0.973571	1204	1
Ephx2	3	0.022918	0.055883	0.973571	1205	3
Bcl2l2	3	0.022958	0.055973	0.973571	1206	2
Foxj1	3	0.022971	0.056005	0.973571	1207	2
Dixdc1	3	0.022978	0.056022	0.973571	1208	3
AY761185	3	0.023006	0.056088	0.973571	1209	1
Gpr52	3	0.023054	0.056216	0.973571	1210	1
Sdha	3	0.023057	0.05622	0.973571	1211	3
Magi3	3	0.023067	0.056248	0.973571	1212	2
NonTargetingControlGuideForMouse_0304	1	0.02307	0.056251	0.973571	1213	1
Tnrc6a	3	0.023076	0.056261	0.973571	1214	2
L3mbtl2	3	0.023089	0.056287	0.973571	1215	3
Olfr1417	3	0.023093	0.056298	0.973571	1216	3
Nphp4	3	0.023108	0.056331	0.973571	1217	2
Abcd4	3	0.023132	0.056389	0.973571	1218	2
Ptrh1	3	0.023151	0.056436	0.973571	1219	2
Olfr143	3	0.023167	0.056476	0.973571	1220	3
Tmem95	3	0.023173	0.056486	0.973571	1221	3
Crb2	3	0.023199	0.056547	0.973571	1222	2
Clec2f	3	0.023236	0.05663	0.973571	1223	3
Vmn1r179	3	0.023244	0.056654	0.973571	1224	3
Grk1	3	0.023248	0.056663	0.973571	1225	2
Lap3	3	0.023254	0.056675	0.973571	1226	2
Dnajc12	3	0.023294	0.056772	0.973571	1227	2
Olfr898	3	0.023296	0.05678	0.973571	1228	2
Hs3st6	3	0.023336	0.056868	0.973571	1229	3
Ncoa4	3	0.023344	0.056881	0.973571	1230	2
Upk1a	3	0.023367	0.056946	0.973571	1231	2
Mc2r	3	0.023389	0.056985	0.973571	1232	3
Nedd9	3	0.023399	0.057012	0.973571	1233	3
Nit1	3	0.0234	0.057013	0.973571	1234	2
Nphp1	3	0.023461	0.057157	0.973571	1235	3
Thoc1	3	0.023473	0.057185	0.973571	1236	2
Slc15a3	3	0.023497	0.057239	0.973571	1237	2
Slc2a13	3	0.023514	0.05727	0.973571	1238	3
Barx2	3	0.023515	0.057277	0.973571	1239	3
Dpagt1	3	0.02353	0.057307	0.973571	1240	2
Slc25a33	3	0.023533	0.057313	0.973571	1241	3
Mnt	3	0.023538	0.057326	0.973571	1242	1
Elovl6	3	0.023586	0.057426	0.973571	1243	2
Slc7a14	3	0.023602	0.057463	0.973571	1244	3
Rnf146	3	0.023634	0.057544	0.973571	1245	1
Nkx2-4	3	0.023682	0.057655	0.973571	1246	2
Hyal2	3	0.023683	0.057656	0.973571	1247	3
C1qtnf2	3	0.023701	0.057701	0.973571	1248	2
Bpifa2	3	0.023735	0.057789	0.973571	1249	3
Spdya	3	0.02375	0.057823	0.973571	1250	2
Gm4951	3	0.02376	0.057843	0.973571	1251	3
Prg4	3	0.023764	0.057857	0.973571	1252	3
Bhmt2	3	0.023767	0.057865	0.973571	1253	2
Nudt15	3	0.023827	0.058003	0.973571	1254	1
Syn3	3	0.023847	0.058046	0.973571	1255	3
Olfr890	3	0.023876	0.058117	0.973571	1256	2
Psme3	3	0.023924	0.058219	0.973571	1257	1
Tmem259	3	0.023931	0.058241	0.973571	1258	3
Gm4884	3	0.023955	0.058303	0.973571	1259	2
Gm11541	3	0.023972	0.058349	0.973571	1260	1
Snx4	3	0.023977	0.058361	0.973571	1261	3
Rasgef1c	3	0.023992	0.058396	0.973571	1262	2
Map3k1	3	0.02402	0.058465	0.973571	1263	2
Ciita	3	0.024069	0.05857	0.973571	1264	1
Ces4a	3	0.024086	0.05862	0.973571	1265	3
Katnal2	3	0.02411	0.058674	0.973571	1266	3
Olfr205	3	0.024117	0.058689	0.973571	1267	1
Naa35	3	0.024143	0.058742	0.973571	1268	3
Fis1	3	0.024164	0.058792	0.973571	1269	3
Wdr27	3	0.024165	0.058794	0.973571	1270	2
Zfp653	3	0.024186	0.058837	0.973571	1271	2
Txnip	3	0.024194	0.058858	0.973571	1272	2
Ms4a6b	3	0.0242	0.058872	0.973571	1273	3
Atad5	3	0.024213	0.058894	0.973571	1274	2
Smad2	3	0.024233	0.058938	0.973571	1275	3
Trank1	3	0.024262	0.059001	0.973571	1276	2
Npy6r	3	0.024277	0.059032	0.973571	1277	2
Ttc7b	3	0.024293	0.059072	0.973571	1278	2
Nufip2	3	0.02431	0.059118	0.973571	1279	1
Rfesd	3	0.024335	0.05916	0.973571	1280	2
Hcn1	3	0.02436	0.059223	0.973571	1281	2
Retsat	3	0.024407	0.059343	0.973571	1282	2
Ap1s2	3	0.024431	0.059387	0.973571	1283	3
Olfr908	3	0.024459	0.05946	0.973571	1284	2
Neurl4	3	0.024487	0.059512	0.973571	1285	3
Ino80b	3	0.024503	0.059552	0.973571	1286	1
Rasgrp4	3	0.024575	0.059725	0.973571	1287	2
Epb4.1l4a	3	0.0246	0.059774	0.973571	1288	1
Senp1	3	0.024603	0.059782	0.973571	1289	3
Smco3	3	0.02465	0.059885	0.973571	1290	2
Arpc1b	3	0.024657	0.059897	0.973571	1291	3
Hspb8	3	0.024663	0.059909	0.973571	1292	3
Stx18	3	0.024696	0.059979	0.973571	1293	2
Onecut1	3	0.024744	0.06009	0.973571	1294	1
Trim62	3	0.024775	0.060151	0.973571	1295	3
N28178	3	0.024793	0.060191	0.973571	1296	2
Mrpl36	3	0.024796	0.060197	0.973571	1297	3
P2rx2	3	0.02483	0.06027	0.973571	1298	2
Draxin	3	0.024841	0.060295	0.973571	1299	2
Il6ra	3	0.02488	0.060374	0.973571	1300	3
Smlr1	3	0.024884	0.060382	0.973571	1301	2
Col16a1	3	0.024889	0.060393	0.973571	1302	2
Olfr16	3	0.024917	0.060456	0.973571	1303	2
Exoc3l4	3	0.024926	0.060477	0.973571	1304	2
Cers6	3	0.024932	0.060492	0.973571	1305	3
Dhx8	3	0.024937	0.060506	0.973571	1306	1
Hltf	3	0.02501	0.060673	0.973571	1307	3
NonTargetingControlGuideForMouse_0150	1	0.025017	0.060689	0.973571	1308	1
Tnpo1	3	0.02506	0.060788	0.973571	1309	2
4930426D05Rik	3	0.025117	0.060925	0.973571	1310	3
Tmem159	3	0.02513	0.060957	0.973571	1311	2
Sptbn2	3	0.025136	0.060972	0.973571	1312	3
Cxcl9	3	0.025184	0.061089	0.973571	1313	3
Tlr5	3	0.02527	0.061288	0.973571	1314	2
Slc44a5	3	0.025275	0.061299	0.973571	1315	1
S100g	3	0.025284	0.061315	0.973571	1316	3
Zdhhc25	3	0.025372	0.061516	0.973571	1317	1
Apba1	3	0.025398	0.061581	0.973571	1318	3
Wls	3	0.02542	0.061631	0.973571	1319	2
Islr2	3	0.025423	0.061638	0.973571	1320	3
Sdk2	3	0.025462	0.061724	0.973571	1321	3
Wbscr16	3	0.025468	0.061736	0.973571	1322	1
Uchl3	3	0.025474	0.061758	0.973571	1323	3
Adamts6	3	0.025498	0.061816	0.973571	1324	3
St3gal2	3	0.025513	0.061849	0.973571	1325	3
Izumo3	3	0.025532	0.061885	0.973571	1326	2
Golt1a	3	0.025553	0.061928	0.973571	1327	3
Gsc2	3	0.025565	0.061954	0.973571	1328	1
Bmp6	3	0.025574	0.061978	0.973571	1329	2
Olfr1450	3	0.025583	0.061997	0.973571	1330	2
Ednrb	3	0.025615	0.062081	0.973571	1331	3
Lilra6	3	0.025638	0.06213	0.973571	1332	2
Cd200r4	3	0.025661	0.062179	0.973571	1333	2
Tbc1d13	3	0.025709	0.062302	0.973571	1334	2
Cdadc1	3	0.025735	0.06237	0.973571	1335	2
Cav1	3	0.025743	0.062385	0.973571	1336	3
Gm5635	3	0.025744	0.062387	0.973571	1337	2
Sycp3	3	0.025747	0.062392	0.973571	1338	3
Strada	3	0.025752	0.062406	0.973571	1339	3
Usp4	3	0.025782	0.062474	0.973571	1340	1
Bnc1	3	0.025809	0.062545	0.973571	1341	3
Ppp1r1c	3	0.025824	0.062574	0.973571	1342	3
Wipf3	3	0.025829	0.062586	0.973571	1343	2
Tcf7l1	3	0.025854	0.062645	0.973571	1344	1
Sh3glb1	3	0.025871	0.062688	0.973571	1345	2
F10	3	0.02595	0.06286	0.973571	1346	1
1110059M19Rik	3	0.025965	0.062891	0.973571	1347	2
Sele	3	0.025987	0.062948	0.973571	1348	3
Cox15	3	0.026025	0.063029	0.973571	1349	2
Olfr145	3	0.026047	0.063075	0.973571	1350	1
Gdpgp1	3	0.02608	0.063151	0.973571	1351	3
Mterfd3	3	0.026085	0.063161	0.973571	1352	2
Lmbrd1	3	0.026095	0.063183	0.973571	1353	1
Fam168b	3	0.026113	0.063234	0.973571	1354	3
Vps11	3	0.026143	0.063291	0.973571	1355	3
4930557A04Rik	3	0.026164	0.063333	0.973571	1356	3
Nup54	3	0.026191	0.063387	0.973571	1357	1
Iqgap1	3	0.02624	0.063498	0.973571	1358	2
Plek	3	0.026242	0.063503	0.973571	1359	3
D1Ertd622e	3	0.026273	0.063585	0.973571	1360	2
Nxf3	3	0.026282	0.063608	0.973571	1361	2
Chmp5	3	0.026288	0.063623	0.973571	1362	3
Mfsd10	3	0.026307	0.063665	0.973571	1363	3
Fam227b	3	0.026312	0.063674	0.973571	1364	2
Hba-x	3	0.02632	0.063692	0.973571	1365	3
1300002K09Rik	3	0.026355	0.063773	0.973571	1366	2
Neto1	3	0.026381	0.063828	0.973571	1367	3
Arhgap42	3	0.026384	0.063832	0.973571	1368	2
Rbm41	3	0.02641	0.063889	0.973571	1369	3
Pisd	3	0.026432	0.063939	0.973571	1370	1
Vwa9	3	0.026481	0.064044	0.973571	1371	1
Arv1	3	0.026488	0.064062	0.973571	1372	2
NonTargetingControlGuideForMouse_0161	1	0.026489	0.064063	0.973571	1373	1
Zfp655	3	0.026496	0.064075	0.973571	1374	2
Olfr633	3	0.026503	0.064084	0.973571	1375	3
Sntb2	3	0.026527	0.064144	0.973571	1376	3
Gm6710	3	0.026538	0.064173	0.973571	1377	3
Dctn3	3	0.026557	0.064208	0.973571	1378	2
Smgc	3	0.026577	0.064251	0.973571	1379	2
Ahcyl1	3	0.026588	0.064276	0.973571	1380	3
Upk3a	3	0.026608	0.064326	0.973571	1381	2
Eif3i	3	0.026625	0.064354	0.973571	1382	1
Ormdl3	3	0.026673	0.064473	0.973571	1383	2
Rab11b	3	0.026713	0.064556	0.973571	1384	3
Oard1	3	0.026722	0.064576	0.973571	1385	2
Ptpn1	3	0.026753	0.064639	0.973571	1386	3
9930013L23Rik	3	0.026755	0.064647	0.973571	1387	2
Cyp3a59	2	0.026766	0.064665	0.973571	1388	2
Ipo9	3	0.026799	0.06473	0.973571	1389	3
Tm2d3	3	0.026818	0.064774	0.973571	1390	1
Cox5a	3	0.026851	0.064845	0.973571	1391	2
Lsmd1	3	0.026859	0.064861	0.973571	1392	3
Zfp831	3	0.026866	0.064876	0.973571	1393	1
Tas2r118	3	0.026871	0.064883	0.973571	1394	3
Ppap2b	3	0.026914	0.064981	0.973571	1395	2
Msh6	3	0.026944	0.065046	0.973571	1396	3
Hddc2	3	0.026962	0.065086	0.973571	1397	1
Slc15a5	3	0.027011	0.065193	0.973571	1398	3
Hint3	3	0.027023	0.065228	0.973571	1399	3
Scamp2	3	0.027059	0.065301	0.973571	1400	2
NonTargetingControlGuideForMouse_0046	1	0.027061	0.065309	0.973571	1401	1
Olfr406	3	0.027092	0.06537	0.973571	1402	3
Ssmem1	3	0.027107	0.065403	0.973571	1403	2
Polr3d	3	0.027128	0.065463	0.973571	1404	2
Mrpl30	3	0.027155	0.065531	0.973571	1405	2
Kif27	3	0.027189	0.065604	0.973571	1406	3
Mob3a	3	0.027194	0.065613	0.973571	1407	3
Ahrr	3	0.027203	0.065636	0.973571	1408	1
Lcn11	3	0.027252	0.065742	0.973571	1409	2
Fgr	3	0.027265	0.065773	0.973571	1410	3
Gipc2	3	0.027289	0.065826	0.973571	1411	3
Ino80e	3	0.0273	0.065848	0.973571	1412	2
H2-Q1	3	0.027303	0.065854	0.973571	1413	3
Adrb2	3	0.027329	0.065909	0.973571	1414	2
Acot13	3	0.027338	0.065933	0.973571	1415	3
Ly6g5c	3	0.027348	0.065952	0.973571	1416	2
Atp10a	3	0.027355	0.065964	0.973571	1417	3
Rarb	3	0.027385	0.06604	0.973571	1418	3
Mrpl41	3	0.027444	0.066171	0.973571	1419	1
Atg12	3	0.027479	0.066243	0.973571	1420	3
Txnl4a	3	0.027486	0.066263	0.973571	1421	2
Hsd3b4	3	0.027492	0.066277	0.973571	1422	2
Lpcat2	3	0.027541	0.066392	0.973571	1423	1
Olfr457	3	0.027556	0.066424	0.973571	1424	2
Bivm	3	0.027583	0.066485	0.973571	1425	2
LOC100504608	3	0.027589	0.066499	0.973571	1426	2
Olfr1251	3	0.027591	0.066502	0.973571	1427	3
Galntl5	3	0.027618	0.066553	0.973571	1428	3
Antxrl	3	0.027637	0.066588	0.973571	1429	1
Lrrc8c	3	0.027651	0.06662	0.973571	1430	3
Plekhn1	3	0.02768	0.06669	0.973571	1431	3
Mettl3	3	0.027685	0.066704	0.973571	1432	1
Pdzd9	3	0.027697	0.066735	0.973571	1433	2
Tmem178b	3	0.027712	0.06677	0.973571	1434	3
NonTargetingControlGuideForMouse_0103	1	0.027716	0.066776	0.973571	1435	1
Gnptab	3	0.027719	0.066785	0.973571	1436	3
Ptbp2	3	0.027725	0.066796	0.973571	1437	3
Pla2g7	3	0.027733	0.066817	0.973571	1438	2
Sez6l2	3	0.027767	0.066902	0.973571	1439	2
Rnf214	3	0.02777	0.066909	0.973571	1440	3
Olfr1204	3	0.027779	0.066924	0.973571	1441	3
Gyk	3	0.027781	0.066925	0.973571	1442	2
Prl7a2	3	0.02784	0.067052	0.973571	1443	3
Zkscan14	3	0.027854	0.067083	0.973571	1444	2
Trim65	3	0.027854	0.067083	0.973571	1445	1
Tuba8	3	0.027897	0.067173	0.973571	1446	3
Rbm46	3	0.027926	0.067242	0.973571	1447	3
Unc13c	3	0.02793	0.067252	0.973571	1448	2
Frmd6	3	0.027944	0.067285	0.973571	1449	3
Plscr4	3	0.027952	0.067304	0.973571	1450	2
Bcl3	3	0.027955	0.067308	0.973571	1451	3
Tppp2	3	0.02797	0.067345	0.973571	1452	2
Rgs1	3	0.027971	0.067346	0.973571	1453	3
Tmem134	3	0.027974	0.067357	0.973571	1454	1
Ssbp2	3	0.027978	0.067366	0.973571	1455	3
Zfp191	3	0.028005	0.067435	0.973571	1456	2
Mgst3	3	0.028014	0.06746	0.973571	1457	3
Syt6	3	0.028022	0.067477	0.973571	1458	2
Htr2c	3	0.028048	0.06754	0.973571	1459	3
Ndrg4	3	0.028105	0.067669	0.973571	1460	3
Nrf1	3	0.02812	0.067707	0.973571	1461	2
Defb22	3	0.028121	0.067707	0.973571	1463	3
Bmp2	3	0.028121	0.067707	0.973571	1462	3
Gm572	3	0.028173	0.067831	0.973571	1464	2
Ctdsp1	3	0.028191	0.067866	0.973571	1465	1
Vmn1r88	3	0.028191	0.067866	0.973571	1466	2
St6galnac1	3	0.028209	0.067904	0.973571	1467	2
Slco6b1	3	0.028216	0.067923	0.973571	1468	3
Mrpl16	3	0.028235	0.067967	0.973571	1469	2
Rbms3	3	0.028236	0.067968	0.973571	1470	3
Slc35d2	3	0.028268	0.068038	0.973571	1471	3
Rps20	3	0.028311	0.068133	0.973571	1472	1
Rassf3	3	0.028395	0.068326	0.973571	1473	2
Osbpl11	3	0.028407	0.068352	0.973571	1474	2
Olfr212	3	0.028449	0.068449	0.973571	1475	2
Sly	3	0.028455	0.068463	0.973571	1476	1
Gm13889	3	0.028457	0.068468	0.973571	1477	2
Aldh18a1	3	0.028475	0.068503	0.973571	1478	2
BC107364	3	0.028503	0.068567	0.973571	1479	2
Ndufb11	3	0.028582	0.068743	0.973571	1480	2
NonTargetingControlGuideForMouse_0870	1	0.028599	0.068779	0.973571	1481	1
Olfr502	3	0.0286	0.068781	0.973571	1482	1
Vmn2r44	2	0.028605	0.068796	0.973571	1483	2
E230019M04Rik	3	0.028634	0.068854	0.973571	1484	3
Aff4	3	0.028636	0.068856	0.973571	1485	2
Sgol2	3	0.028648	0.068891	0.973571	1486	2
Cnot3	3	0.02868	0.068966	0.973571	1487	3
Nat3	3	0.028696	0.06901	0.973571	1488	1
Slc1a6	3	0.028698	0.069019	0.973571	1489	2
Rpl4	3	0.028744	0.06912	0.973571	1490	1
Tdgf1	3	0.028779	0.069191	0.973571	1491	2
Nap1l3	3	0.028792	0.069224	0.973571	1492	1
Gucy1b2	3	0.028795	0.069228	0.973571	1493	3
Capn6	3	0.028814	0.069263	0.973571	1494	2
Smco1	3	0.02883	0.069299	0.973571	1495	3
Prmt1	3	0.02884	0.069322	0.973571	1496	1
Zfp759	3	0.028846	0.069331	0.973571	1497	3
Hint2	3	0.028859	0.069363	0.973571	1498	3
Epb4.2	3	0.02886	0.069364	0.973571	1499	3
H2-L	3	0.028888	0.069425	0.973571	1500	2
Dmrtc1c1	3	0.028892	0.069431	0.973571	1501	3
Fbxl21	3	0.028937	0.069531	0.973571	1502	2
Gpt2	3	0.028985	0.069646	0.973571	1503	1
Gm7534	3	0.028998	0.069674	0.973571	1504	3
Nubp2	3	0.029003	0.069681	0.973571	1505	2
Atl2	3	0.029005	0.069688	0.973571	1506	3
Glipr1l2	3	0.029026	0.069728	0.973571	1507	3
Gstcd	3	0.029049	0.069775	0.973571	1508	3
Mia3	3	0.029066	0.069812	0.973571	1509	2
Fam47c	3	0.029092	0.069876	0.973571	1510	2
Tfpi	3	0.029114	0.069915	0.973571	1511	3
Wdfy2	3	0.029126	0.069944	0.973571	1512	3
Abcb9	3	0.029129	0.069954	0.973571	1513	1
Pgm2l1	3	0.029142	0.069991	0.973571	1514	3
Colec11	3	0.029177	0.070068	0.973571	1515	3
Mta2	3	0.029203	0.070126	0.973571	1516	3
Vmn2r116	3	0.029225	0.070186	0.973571	1517	1
Nlrp1a	3	0.029236	0.070215	0.973571	1518	2
Cacnb4	3	0.029249	0.070244	0.973571	1519	3
Olfr606	3	0.029273	0.070298	0.973571	1520	1
Upf2	3	0.029291	0.070336	0.973571	1521	3
Cpne3	3	0.029296	0.070347	0.973571	1522	3
Wdfy3	3	0.029305	0.070364	0.973571	1523	3
Snapc3	3	0.029322	0.070399	0.973571	1524	1
Zfp260	3	0.029327	0.070414	0.973571	1525	2
Apbb1ip	3	0.029345	0.070454	0.973571	1526	3
Olfr872	3	0.029354	0.070479	0.973571	1527	3
Ubxn1	3	0.029357	0.070485	0.973571	1528	3
Xpnpep1	3	0.02937	0.070514	0.973571	1529	1
Defb42	3	0.029392	0.070571	0.973571	1531	3
Ctsb	3	0.029392	0.070571	0.973571	1530	3
Elac1	3	0.029418	0.070629	0.973571	1532	1
Tas2r137	3	0.029539	0.070899	0.973571	1533	3
Pgm3	3	0.029562	0.070944	0.973571	1534	1
Pabpc5	3	0.029567	0.070961	0.973571	1535	3
Hoxc6	3	0.02961	0.071055	0.973571	1536	1
Ofcc1	3	0.029625	0.071087	0.973571	1537	2
NonTargetingControlGuideForMouse_0270	1	0.029629	0.071097	0.973571	1538	1
Prpf39	3	0.029658	0.071169	0.973571	1539	1
Zfp651	3	0.029685	0.071233	0.973571	1540	3
Pdilt	3	0.029706	0.071279	0.973571	1541	2
Wfdc10	3	0.029741	0.071354	0.973571	1542	3
Tubgcp2	3	0.029754	0.071385	0.973571	1543	1
4833403I15Rik	3	0.029802	0.071487	0.973571	1544	1
Sp9	3	0.029816	0.07152	0.973571	1545	2
Plcl1	3	0.029851	0.071597	0.973571	1546	1
Gabra5	3	0.029879	0.071668	0.973571	1547	2
Dysf	3	0.029898	0.071707	0.973571	1548	2
Alb	3	0.029899	0.07171	0.973571	1549	2
Zfp131	3	0.029947	0.071817	0.973571	1550	1
Gatsl2	3	0.029954	0.071834	0.973571	1551	3
D3Ertd254e	3	0.02997	0.071866	0.973571	1552	2
Dusp8	3	0.029989	0.071909	0.973571	1553	2
Thap3	3	0.029989	0.071909	0.973571	1554	3
Pef1	3	0.029995	0.071921	0.973571	1555	1
Rnls	3	0.030015	0.071976	0.973571	1556	3
Olfr378	3	0.030016	0.071977	0.973571	1557	2
Ghr	3	0.030043	0.072036	0.973571	1558	2
Olfr774	3	0.030072	0.072107	0.973571	1559	3
Prr19	3	0.030101	0.072176	0.973571	1560	3
Hdgf	3	0.030126	0.072231	0.973571	1561	2
Tbcd	3	0.030139	0.072265	0.973571	1562	1
Srrm1	3	0.030187	0.072369	0.973571	1563	1
Nek1	3	0.030224	0.072448	0.973571	1564	3
Nt5c1b	3	0.030257	0.072523	0.973571	1565	3
Meis3	3	0.030276	0.07257	0.973571	1566	2
Zfp957	3	0.030276	0.07257	0.973571	1567	2
Vmn1r19	3	0.030305	0.072628	0.973571	1568	3
Srrm3	3	0.030309	0.072638	0.973571	1569	2
Cyp2b23	3	0.030331	0.072684	0.973571	1570	2
Atp2b3	3	0.030336	0.072695	0.973571	1571	2
Cyp2c69	3	0.030382	0.072802	0.973571	1572	3
Flywch2	3	0.03041	0.07287	0.973571	1573	3
Mdh2	3	0.030427	0.07291	0.973571	1574	2
Vmn1r206	3	0.030441	0.072943	0.973571	1575	2
Wsb1	3	0.0305	0.073065	0.973571	1577	2
Olfr1167	3	0.0305	0.073065	0.973571	1576	3
Sp3	3	0.03052	0.073106	0.973571	1578	3
Osgin2	3	0.030532	0.073136	0.973571	1579	3
Olfr1302	3	0.030554	0.073189	0.973571	1580	3
Gprc6a	3	0.030572	0.073222	0.973571	1581	2
Ghrh	3	0.03058	0.073238	0.973571	1582	3
Arl5c	3	0.030595	0.073269	0.973571	1584	3
Rce1	3	0.030595	0.073269	0.973571	1583	3
Aoc1	3	0.03062	0.07333	0.973571	1585	2
Atxn2	3	0.030668	0.073437	0.973571	1586	1
Arf3	3	0.030727	0.073567	0.973571	1587	3
Rbm24	3	0.030751	0.073616	0.973571	1588	3
AI597479	3	0.030764	0.073638	0.973571	1589	2
Pabpc1	3	0.030812	0.073748	0.973571	1590	1
Fam72a	3	0.030826	0.07378	0.973571	1591	3
Akna	3	0.030842	0.073814	0.973571	1592	2
Itih1	3	0.030851	0.073836	0.973571	1593	2
Eps8	3	0.030852	0.073838	0.973571	1594	3
Zfp106	3	0.03086	0.073857	0.973571	1595	1
Zdhhc21	3	0.03087	0.073876	0.973571	1596	2
Olfr600	3	0.030908	0.073964	0.973571	1597	2
Spink4	3	0.03091	0.073967	0.973571	1598	3
Rnf150	3	0.030925	0.074	0.973571	1599	2
Nfkbib	3	0.030929	0.07401	0.973571	1600	3
Gm12789	3	0.030942	0.074031	0.973571	1601	3
Scgb2b12	2	0.030948	0.074044	0.973571	1602	1
Vmn2r2	3	0.030953	0.074053	0.973571	1603	2
Bex2	3	0.031004	0.074161	0.973571	1604	1
Utp20	3	0.031027	0.07421	0.973571	1605	2
Adcy1	3	0.031031	0.074221	0.973571	1606	3
Olfr149	3	0.031045	0.074247	0.973571	1607	2
Smtnl2	3	0.031052	0.074264	0.973571	1608	2
Olfr1463	3	0.031082	0.074333	0.973571	1609	2
Ankfn1	3	0.0311	0.074374	0.973571	1610	2
Mrgbp	3	0.031147	0.074474	0.973571	1611	2
G6pc	3	0.031148	0.074476	0.973571	1612	2
Ctsq	3	0.031157	0.074496	0.973571	1613	3
Mturn	3	0.031184	0.074564	0.973571	1614	3
Slc25a14	3	0.031244	0.074688	0.973571	1615	3
Tomm6	3	0.031268	0.074741	0.973571	1616	2
Dhrs1	3	0.031292	0.074793	0.973571	1617	2
Phf7	3	0.031324	0.074862	0.973571	1618	2
Taar7f	3	0.031333	0.074882	0.973571	1619	2
Chtf18	3	0.031352	0.074921	0.973571	1620	2
4933427D06Rik	3	0.031389	0.075002	0.973571	1621	1
Sntg1	3	0.031389	0.075005	0.973571	1622	2
Vmn2r122	3	0.03145	0.075162	0.973571	1623	3
Pwp1	3	0.031454	0.075172	0.973571	1624	2
Smarcc1	3	0.031462	0.075189	0.973571	1625	3
Rgs8	3	0.031479	0.075226	0.973571	1626	3
Bcr	3	0.031533	0.075344	0.973571	1627	2
Vmn2r1	3	0.031597	0.075494	0.973571	1628	3
Tmem5	3	0.031603	0.07551	0.973571	1629	2
Ern1	3	0.031629	0.075556	0.973571	1630	2
Cmtm6	3	0.031678	0.075665	0.973571	1631	2
Myo7a	3	0.031725	0.075764	0.973571	1632	2
Lrrc61	3	0.031749	0.07582	0.973571	1633	3
Spag8	3	0.031768	0.075866	0.973571	1634	3
Olfr1330	3	0.031773	0.075875	0.973571	1635	1
Ushbp1	3	0.031781	0.07589	0.973571	1636	2
Cep135	3	0.031815	0.075967	0.973571	1637	3
Tubb2a	3	0.031821	0.07598	0.973571	1638	2
Prdm11	3	0.031869	0.076084	0.973571	1639	2
Daam2	3	0.031884	0.076118	0.973571	1640	2
Gata5	3	0.031893	0.076139	0.973571	1641	2
Gzf1	3	0.031917	0.076195	0.973571	1642	2
Gpr98	3	0.03199	0.076354	0.973571	1643	3
BC016579	3	0.031997	0.076371	0.973571	1644	2
Zfp442	2	0.03201	0.076401	0.973571	1645	1
Nedd4	3	0.032061	0.076518	0.973571	1646	1
Fli1	3	0.032072	0.07655	0.973571	1647	2
Cdyl	3	0.032075	0.076553	0.973571	1648	3
Paqr6	3	0.032122	0.076641	0.973571	1649	3
Rhpn2	3	0.032157	0.076706	0.973571	1650	2
Map9	3	0.032194	0.07679	0.973571	1651	2
Wnt10b	3	0.032205	0.076816	0.973571	1652	2
NonTargetingControlGuideForMouse_0350	1	0.032213	0.076841	0.973571	1653	1
Scnn1b	3	0.032223	0.076859	0.973571	1654	3
Abcd2	3	0.032253	0.076932	0.973571	1655	3
Ndufaf5	3	0.032269	0.076966	0.973571	1656	3
Gm904	3	0.032325	0.077099	0.973571	1658	1
4930578I06Rik	3	0.032325	0.077099	0.973571	1657	2
Crybb2	3	0.032326	0.077099	0.973571	1659	2
Ptplad1	3	0.032333	0.077116	0.973571	1660	3
Cdkn1b	3	0.032345	0.077136	0.973571	1661	2
Lhfpl2	3	0.032388	0.077228	0.973571	1662	3
Vmn1r195	3	0.032392	0.077238	0.973571	1663	2
Zbtb11	3	0.032397	0.077247	0.973571	1664	1
Cgrrf1	3	0.032438	0.077343	0.973571	1665	3
Zfp488	3	0.032448	0.077362	0.973571	1666	3
Usp44	3	0.032469	0.077413	0.973571	1668	2
Uqcr11	3	0.032469	0.077413	0.973571	1667	2
Gm14393	1	0.032508	0.077504	0.973571	1669	1
Proc	3	0.0326	0.077696	0.973571	1670	3
Angptl2	3	0.032637	0.077763	0.973571	1671	2
Krt16	3	0.03268	0.077863	0.973571	1672	3
Ube2ql1	3	0.032685	0.077874	0.973571	1673	1
Olfr1305	3	0.032685	0.077876	0.973571	1674	2
Stx12	3	0.032723	0.077964	0.973571	1675	2
Itpr1	3	0.032733	0.077987	0.973571	1676	2
Atp5e	3	0.032781	0.078085	0.973571	1677	1
Tmod2	3	0.032808	0.078151	0.973571	1678	3
Il22ra2	3	0.032829	0.07819	0.973571	1679	2
Ptges3	3	0.032877	0.078304	0.973571	1680	2
Leng8	3	0.032894	0.078337	0.973571	1681	3
Zfp142	3	0.032924	0.078403	0.973571	1682	3
Slc32a1	3	0.032925	0.078403	0.973571	1683	1
Epha4	3	0.032961	0.078481	0.973571	1684	2
Olfr1323	3	0.032969	0.078503	0.973571	1685	3
Ubac1	3	0.032973	0.078508	0.973571	1686	2
Rasgef1a	3	0.03299	0.078554	0.973571	1687	2
Rwdd1	3	0.03299	0.078554	0.973571	1688	3
Wdr63	3	0.032999	0.078585	0.973571	1689	2
Gars	3	0.033009	0.078604	0.973571	1690	2
Plod3	3	0.033021	0.078631	0.973571	1691	2
Brwd1	3	0.033066	0.078733	0.973571	1692	2
Foxa3	3	0.033069	0.078739	0.973571	1693	2
Sdr39u1	3	0.033085	0.078776	0.973571	1694	2
Slc4a1ap	3	0.033117	0.078851	0.973571	1695	1
Acadvl	3	0.033165	0.07897	0.973571	1696	1
Hist1h4i	3	0.033213	0.079082	0.973571	1697	1
Tbc1d22b	3	0.033228	0.079117	0.973571	1698	2
Kdelc1	3	0.033261	0.079196	0.973571	1699	2
Tmem167b	3	0.033306	0.079309	0.973571	1700	3
Tcp10a	3	0.033309	0.079313	0.973571	1701	3
Megf9	3	0.033324	0.079343	0.973571	1702	2
1700065I17Rik	3	0.033324	0.079343	0.973571	1703	3
Cplx2	3	0.033357	0.079417	0.973571	1704	3
2810006K23Rik	3	0.033365	0.079431	0.973571	1705	3
Agr2	3	0.033371	0.079445	0.973571	1706	2
Tmem260	3	0.0334	0.079506	0.973571	1707	2
Mbip	3	0.033405	0.079514	0.973571	1708	1
Fhit	3	0.033405	0.079515	0.973571	1709	3
H2-Eb2	3	0.033439	0.079594	0.973571	1710	3
Pdc	3	0.033446	0.07961	0.973571	1711	3
Slc25a43	3	0.033453	0.079625	0.973571	1712	1
Dab2ip	3	0.033471	0.07967	0.973571	1713	3
Dmtf1	3	0.033501	0.079725	0.973571	1714	2
Gins2	3	0.033549	0.079838	0.973571	1715	1
Vmn1r178	3	0.033553	0.079845	0.973571	1716	3
Rhox12	3	0.033558	0.079853	0.973571	1717	3
Gm13157	3	0.033582	0.079906	0.973571	1718	3
Leprot	3	0.033592	0.079926	0.973571	1719	2
Cyp2j5	3	0.033597	0.079941	0.973571	1720	1
Bbs1	3	0.033644	0.080062	0.973571	1721	3
Ldb1	3	0.03365	0.08007	0.973571	1722	2
C6	3	0.033671	0.080118	0.973571	1723	3
Rabgef1	3	0.033683	0.080138	0.973571	1724	3
Omt2a	3	0.033692	0.080163	0.973571	1725	2
Spdl1	3	0.033698	0.080178	0.973571	1726	3
Nrgn	3	0.03374	0.080273	0.973571	1727	1
Itfg1	3	0.033747	0.08029	0.973571	1728	3
Fbxo11	3	0.033773	0.080355	0.973571	1729	3
Dars2	3	0.033788	0.080389	0.973571	1730	3
C030039L03Rik	3	0.033794	0.0804	0.973571	1731	2
Ppp1r9b	3	0.033804	0.080415	0.973571	1732	2
Rab15	3	0.033832	0.080477	0.973571	1733	2
Anpep	3	0.033863	0.080541	0.973571	1734	3
Sun3	3	0.033884	0.080588	0.973571	1735	2
Fam163b	3	0.03389	0.080601	0.973571	1736	2
Dpy19l1	3	0.03391	0.080648	0.973571	1737	2
Asic5	3	0.033932	0.080686	0.973571	1738	2
Pfkm	3	0.033973	0.080788	0.973571	1739	3
Pfpl	3	0.03398	0.080798	0.973571	1740	1
Vmn1r215	3	0.034009	0.080858	0.973571	1741	3
Mga	3	0.03402	0.080878	0.973571	1742	3
Casp1	3	0.034025	0.080893	0.973571	1743	3
Abcg2	3	0.034069	0.080995	0.973571	1744	3
Pnpla2	3	0.034074	0.081003	0.973571	1745	2
Klrb1a	3	0.034124	0.081105	0.973571	1746	3
Hcn3	3	0.034169	0.081197	0.973571	1747	3
2010109A12Rik	3	0.034185	0.081227	0.973571	1748	3
Fam13b	3	0.034199	0.081264	0.973571	1749	2
Adcy5	3	0.034226	0.081328	0.973571	1750	3
Olfr225	3	0.034244	0.081371	0.973571	1751	3
Coch	3	0.034268	0.08142	0.973571	1752	1
Sox8	3	0.034287	0.081458	0.973571	1753	2
Slc22a17	3	0.034316	0.081522	0.973571	1754	1
NonTargetingControlGuideForMouse_0891	1	0.034323	0.081536	0.973571	1755	1
Chrna1	3	0.034354	0.081599	0.973571	1756	3
2010107G12Rik	3	0.034364	0.081621	0.973571	1757	2
Ccl1	3	0.034379	0.081653	0.973571	1759	3
Sdr16c5	3	0.034379	0.081653	0.973571	1758	3
Mypn	3	0.034384	0.081665	0.973571	1760	2
Rps15a	3	0.034412	0.081723	0.973571	1761	1
Bfsp1	3	0.034413	0.081725	0.973571	1762	3
Mrgprb4	3	0.034451	0.081809	0.973571	1763	2
Bcl2a1c	3	0.034486	0.081882	0.973571	1764	3
Syne2	3	0.034501	0.081922	0.973571	1765	3
Dopey1	3	0.034506	0.081931	0.973571	1766	3
Olfr655	3	0.034508	0.081935	0.973571	1767	1
1700019A02Rik	3	0.034525	0.08197	0.973571	1768	3
Slc34a3	3	0.034584	0.082093	0.973571	1769	3
Calcb	3	0.034588	0.082098	0.973571	1770	2
Hist1h2br	1	0.034593	0.082105	0.973571	1771	1
Adam26b	3	0.034617	0.082154	0.973571	1772	2
Olfr1387	3	0.034651	0.082232	0.973571	1773	3
Atp11c	3	0.034668	0.082261	0.973571	1774	3
Ptx3	3	0.034681	0.082295	0.973571	1776	3
1700129C05Rik	3	0.034681	0.082295	0.973571	1775	3
Nxph1	3	0.034697	0.082335	0.973571	1777	3
AA467197	3	0.034699	0.082343	0.973571	1778	1
Calu	3	0.034747	0.082445	0.973571	1779	1
Esf1	3	0.034767	0.082484	0.973571	1780	3
Chmp3	3	0.034793	0.082537	0.973571	1781	3
Inpp5b	3	0.034798	0.082551	0.973571	1782	3
Clcn5	3	0.034802	0.082556	0.973571	1783	2
Satl1	3	0.034856	0.082683	0.973571	1784	3
Fancl	3	0.034869	0.082705	0.973571	1785	3
Usp21	3	0.034891	0.082745	0.973571	1786	1
Agtr1b	3	0.034935	0.082849	0.973571	1787	3
Cmtm5	3	0.034939	0.082861	0.973571	1788	1
Niacr1	3	0.034948	0.082887	0.973571	1789	2
Chd6	3	0.03499	0.082975	0.973571	1790	3
Gbp2	3	0.035007	0.083015	0.973571	1791	2
Vmn1r213	3	0.035035	0.08308	0.973571	1792	2
Olfr1265	3	0.035076	0.083178	0.973571	1793	2
B4galnt3	3	0.035083	0.083195	0.973571	1794	1
Krt83	3	0.035095	0.083219	0.973571	1795	2
Capg	3	0.035118	0.083281	0.973571	1796	3
Gtf2h1	3	0.035131	0.083315	0.973571	1797	2
Olfr608	3	0.035174	0.083408	0.973571	1798	2
Mamld1	3	0.035192	0.083452	0.973571	1799	3
Rars2	3	0.035193	0.083453	0.973571	1800	2
Ccdc37	3	0.0352	0.083466	0.973571	1801	3
1700018F24Rik	3	0.035226	0.083531	0.973571	1802	3
Irak1bp1	3	0.035242	0.083561	0.973571	1803	2
Defb12	3	0.035272	0.083616	0.973571	1804	3
Senp6	3	0.035274	0.083619	0.973571	1805	2
Ptprq	3	0.035291	0.083662	0.973571	1806	2
Ank	3	0.035298	0.083676	0.973571	1807	3
Mms19	3	0.035322	0.083722	0.973571	1808	2
Git1	3	0.035356	0.083798	0.973571	1809	3
Acot6	3	0.035361	0.083809	0.973571	1810	3
Wnt7b	3	0.03537	0.083831	0.973571	1811	2
Kifc3	3	0.035375	0.083837	0.973571	1812	2
Mgst1	3	0.035409	0.083921	0.973571	1813	2
Muc15	3	0.035418	0.08394	0.973571	1814	1
Dlg1	3	0.035466	0.084039	0.973571	1815	2
Ccdc28a	3	0.035475	0.084054	0.973571	1816	3
Olfr342	3	0.035517	0.084143	0.973571	1817	3
Atp13a1	3	0.035544	0.084198	0.973571	1818	3
Atp2c2	3	0.035547	0.084206	0.973571	1819	2
Cebpz	3	0.035577	0.084268	0.973571	1820	2
Nkx2-5	3	0.035578	0.084277	0.973571	1821	3
Zfp276	3	0.035591	0.084304	0.973571	1822	3
Gtf2a2	3	0.03561	0.084335	0.973571	1823	1
Vmn1r9	3	0.035642	0.084412	0.973571	1824	3
Hmha1	3	0.035657	0.084441	0.973571	1825	1
Hook1	3	0.035695	0.084528	0.973571	1826	3
Grik2	3	0.035705	0.084556	0.973571	1827	1
Adamts14	3	0.035753	0.084662	0.973571	1828	2
Rab36	3	0.035784	0.084729	0.973571	1829	2
Olfr1016	3	0.035814	0.084791	0.973571	1830	2
3110009E18Rik	3	0.03582	0.084806	0.973571	1831	3
Aif1l	3	0.035849	0.084869	0.973571	1832	1
Olfr961	3	0.035883	0.084948	0.973571	1833	2
Top1	3	0.035897	0.084977	0.973571	1834	2
Anxa6	3	0.035898	0.084978	0.973571	1835	3
Kcnd3	3	0.035903	0.084992	0.973571	1836	2
Otub2	3	0.035932	0.085046	0.973571	1837	2
Slc16a2	3	0.035945	0.085068	0.973571	1838	2
Fam24a	3	0.035967	0.085116	0.973571	1839	3
Il5ra	3	0.035988	0.085162	0.973571	1840	3
E2f5	3	0.035993	0.085171	0.973571	1841	1
Tmem120b	3	0.036021	0.085232	0.973571	1842	3
Zfp445	3	0.036041	0.085278	0.973571	1843	3
Cuedc2	3	0.036079	0.085356	0.973571	1844	3
Gsk3b	3	0.036088	0.085371	0.973571	1845	1
Tcf21	3	0.036109	0.085405	0.973571	1846	3
2610008E11Rik	3	0.036111	0.085409	0.973571	1847	2
Nfkbid	3	0.036136	0.085465	0.973571	1848	2
Tuba3b	3	0.036138	0.085468	0.973571	1849	3
Uba3	3	0.036168	0.085531	0.973571	1850	3
Cecr6	3	0.036181	0.085562	0.973571	1851	3
Pla2g12a	3	0.036184	0.085568	0.973571	1852	2
Vmn2r113	3	0.03619	0.085581	0.973571	1853	3
Tmem205	3	0.0362	0.0856	0.973571	1854	2
Fgf13	3	0.036219	0.085648	0.973571	1855	3
Supt5	3	0.036232	0.085677	0.973571	1856	1
Lxn	3	0.03628	0.085787	0.973571	1857	2
Amica1	3	0.0363	0.085828	0.973571	1858	3
Ms4a6c	3	0.036328	0.08589	0.973571	1859	1
Ucma	3	0.036353	0.085945	0.973571	1860	3
Lamp3	3	0.036376	0.086008	0.973571	1861	2
Bcs1l	3	0.03638	0.086024	0.973571	1862	3
Obscn	3	0.036413	0.086091	0.973571	1863	3
Zmat5	3	0.036459	0.086188	0.973571	1864	2
Sptb	3	0.036471	0.086216	0.973571	1865	1
Hmces	3	0.036496	0.086269	0.973571	1866	3
2017-03-11	3	0.036499	0.086276	0.973571	1867	2
Naa60	3	0.036564	0.086429	0.973571	1868	3
Fahd2a	3	0.036567	0.086433	0.973571	1869	2
Ndufc2	3	0.036615	0.086531	0.973571	1870	3
Camk1d	3	0.036618	0.08654	0.973571	1871	2
Olfr1298	3	0.036631	0.086564	0.973571	1872	3
Mpeg1	3	0.036631	0.086564	0.973571	1873	3
Stra6	3	0.036663	0.086611	0.973571	1874	1
Hist1h3e	3	0.036664	0.086613	0.973571	1875	3
Tssc4	3	0.036686	0.086662	0.973571	1876	3
Helq	3	0.036698	0.086693	0.973571	1877	2
Triqk	3	0.036707	0.086707	0.973571	1878	3
Cdhr1	3	0.036711	0.08671	0.973571	1879	2
Olfr1197	3	0.036721	0.086726	0.973571	1880	3
Ccnjl	3	0.036758	0.086813	0.973571	1881	3
Dppa4	3	0.036759	0.086814	0.973571	1882	1
Il13ra1	3	0.036761	0.086821	0.973571	1883	3
Rnf182	3	0.036788	0.086872	0.973571	1884	2
F830045P16Rik	3	0.036794	0.08688	0.973571	1885	3
Mllt10	3	0.036806	0.086912	0.973571	1886	1
Fam19a4	3	0.036854	0.087012	0.973571	1887	2
Brip1	3	0.036878	0.087063	0.973571	1888	2
Bloc1s5	3	0.036908	0.08713	0.973571	1889	3
Slc6a13	3	0.036939	0.087199	0.973571	1890	2
Vmn1r235	3	0.03695	0.087218	0.973571	1891	2
Arel1	3	0.036965	0.087245	0.973571	1892	3
Trim13	3	0.037031	0.087397	0.973571	1893	3
Cxcl1	3	0.037046	0.087426	0.973571	1894	1
Hnmt	3	0.037059	0.08746	0.973571	1895	2
4930522H14Rik	3	0.037099	0.087552	0.973571	1896	2
Cyp2b19	3	0.037141	0.087635	0.973571	1897	2
Ppp3ca	3	0.037189	0.087741	0.973571	1898	2
Snw1	3	0.037237	0.087846	0.973571	1899	1
St6gal2	3	0.037271	0.087915	0.973571	1900	3
Cnih2	3	0.037285	0.087949	0.973571	1901	2
Gpr139	3	0.0373	0.087982	0.973571	1902	2
Pbrm1	3	0.037348	0.088084	0.973571	1903	3
Tmbim6	3	0.037351	0.088088	0.973571	1904	2
Rhoj	3	0.037371	0.088133	0.973571	1905	2
Olfr741	3	0.037381	0.088149	0.973571	1906	2
Vmn1r151	1	0.037398	0.088197	0.973571	1907	1
Ppp1r32	3	0.037429	0.088261	0.973571	1908	2
Ebf3	3	0.037476	0.088361	0.973571	1909	2
Ppp1r3e	3	0.037515	0.088443	0.973571	1910	3
Trpm5	3	0.03754	0.088499	0.973571	1911	3
Tmem161a	3	0.037572	0.088568	0.973571	1912	1
Fsd1l	3	0.037593	0.08861	0.973571	1913	2
Sult2a4	3	0.03762	0.088664	0.973571	1915	2
Olfr329-ps	3	0.03762	0.088664	0.973571	1914	3
Itga2	3	0.037668	0.088766	0.973571	1916	2
Pdzd4	3	0.037716	0.088861	0.973571	1917	3
Olfr111	3	0.037722	0.088875	0.973571	1918	3
Rbm3	3	0.037734	0.088905	0.973571	1919	2
Olfr494	3	0.037744	0.088923	0.973571	1920	3
Thbs2	3	0.037758	0.088951	0.973571	1921	3
Zdhhc4	3	0.037783	0.089021	0.973571	1922	3
Rps11	3	0.037811	0.089073	0.973571	1923	1
Rnpep	3	0.037816	0.089081	0.973571	1924	3
Cypt8	3	0.037832	0.089121	0.973571	1925	3
Prrxl1	3	0.037836	0.089132	0.973571	1926	2
Sec14l1	3	0.037859	0.08919	0.973571	1927	1
Chst7	3	0.037865	0.0892	0.973571	1928	3
Hif3a	3	0.037926	0.089339	0.973571	1929	3
Tmem229b	3	0.037957	0.089407	0.973571	1930	2
Lztr1	3	0.037987	0.089469	0.973571	1931	3
Rdh8	3	0.037998	0.089493	0.973571	1932	3
Rbms2	3	0.038002	0.089501	0.973571	1933	1
2310035C23Rik	3	0.038015	0.08953	0.973571	1934	3
Ptpn21	3	0.03805	0.08961	0.973571	1935	2
Tpsg1	3	0.038098	0.089727	0.973571	1936	2
Proser2	3	0.038115	0.089761	0.973571	1937	3
Zfp72	3	0.03814	0.089818	0.973571	1938	3
Fhad1	3	0.038146	0.089829	0.973571	1939	3
Gje1	3	0.038146	0.08983	0.973571	1940	1
Clec4f	3	0.038181	0.089909	0.973571	1941	2
P2ry13	3	0.038194	0.089929	0.973571	1942	1
Haus8	3	0.038241	0.090039	0.973571	1943	2
Cep97	3	0.038283	0.090133	0.973571	1944	2
Ear6	1	0.038298	0.090168	0.973571	1945	1
Polr2j	3	0.038313	0.090199	0.973571	1946	2
Sh3bp4	3	0.038337	0.090253	0.973571	1947	2
Podxl	3	0.038385	0.090361	0.973571	1948	2
2310030G06Rik	3	0.038385	0.090361	0.973571	1949	1
Alx3	3	0.038419	0.090444	0.973571	1950	3
Zfp516	3	0.038467	0.090544	0.973571	1951	2
Ppapdc3	3	0.038538	0.090684	0.973571	1952	2
Sgcb	3	0.038576	0.090766	0.973571	1953	1
Olfr868	3	0.038624	0.090868	0.973571	1954	2
Tfg	3	0.038651	0.090927	0.973571	1955	2
Heatr6	3	0.038672	0.090964	0.973571	1956	1
Fkrp	3	0.038681	0.090983	0.973571	1957	2
Dner	3	0.038691	0.091009	0.973571	1958	2
Ptpru	3	0.038712	0.091052	0.973571	1959	2
Actn3	3	0.038767	0.091183	0.973571	1960	1
Pitpnm2	3	0.038775	0.091194	0.973571	1961	3
Atp6v0d1	3	0.038815	0.091283	0.973571	1962	2
D730048I06Rik	3	0.038848	0.091355	0.973571	1963	3
Hjurp	3	0.038863	0.091388	0.973571	1964	2
Foxq1	3	0.038866	0.091393	0.973571	1965	2
Pet112	3	0.038911	0.091486	0.973571	1966	1
NonTargetingControlGuideForMouse_0338	1	0.038936	0.091539	0.973571	1967	1
Clpx	3	0.038938	0.091542	0.973571	1968	3
NonTargetingControlGuideForMouse_0424	1	0.038952	0.091576	0.973571	1969	1
Olfr1042	3	0.038958	0.09159	0.973571	1970	3
Defb14	3	0.039006	0.091688	0.973571	1971	2
Cox6a2	3	0.039011	0.091696	0.973571	1972	3
Pebp4	3	0.039054	0.091791	0.973571	1973	2
Fah	3	0.039062	0.091811	0.973571	1974	3
Cyp2d22	3	0.039081	0.091858	0.973571	1975	2
Pml	3	0.039096	0.091887	0.973571	1976	3
Fos	3	0.039102	0.091902	0.973571	1977	1
Cntrob	3	0.039141	0.091995	0.973571	1978	3
Trim42	3	0.039141	0.091995	0.973571	1979	3
Samd4b	3	0.039143	0.091999	0.973571	1980	2
Pcdhb4	3	0.039153	0.092024	0.973571	1981	2
Camkk1	3	0.039158	0.092034	0.973571	1982	3
4931409K22Rik	3	0.039175	0.092073	0.973571	1983	3
Apba3	3	0.039197	0.092115	0.973571	1984	3
Zfp444	3	0.039241	0.092205	0.973571	1985	2
Lrdd	3	0.039245	0.09221	0.973571	1986	1
Olfr616	3	0.039249	0.092215	0.973571	1987	3
Neurl3	3	0.039256	0.092233	0.973571	1988	2
Prss42	3	0.03926	0.092239	0.973571	1989	3
8430408G22Rik	3	0.039286	0.092298	0.973571	1991	3
Adcy2	3	0.039286	0.092298	0.973571	1990	3
Fbxl22	3	0.039293	0.092312	0.973571	1992	1
Olfr172	3	0.039294	0.092313	0.973571	1993	3
Tktl1	3	0.039322	0.092377	0.973571	1994	3
NonTargetingControlGuideForMouse_0503	1	0.039377	0.092492	0.973571	1995	1
Poglut1	3	0.03938	0.092498	0.973571	1996	2
Relt	3	0.039388	0.092514	0.973571	1997	2
Kif16b	3	0.039411	0.092569	0.973571	1998	2
Xcr1	3	0.039413	0.092574	0.973571	1999	3
[truncated: 19,311 more rows]
